# Supplementary material for: Mechanochemical synthesis of aromatic sulfonamides
Source: Royal Society of Chemistry journal article supplement (doi:10.1039/d1cc03224k), 2021-01-01
Supplement: d1cc03224k1.pdf [file d1cc03224k1.pdf]

# Mechanochemical synthesis of aromatic sulfonamides.

Satenik Mkrtchyan,<sup>a</sup> Viktor O. Iaroshenko.<sup>a,b,c\*</sup>

<sup>a</sup>Laboratory of Homogeneous Catalysis and Molecular Design at the Centre of Molecular and Macromolecular Studies, Polish Academy of Sciences, Sienkiewicza 112, PL-90-363 Łódź, Poland.

<sup>b</sup>Department of Chemistry, University of Helsinki, A.I. Virtasen aukio 1, 00014 Helsinki, Finland.

<https://researchportal.helsinki.fi/en/persons/viktor-iaroshenko>

E-mail: [iva108@gmail.com](mailto:iva108@gmail.com)

<sup>c</sup>Department of Chemistry, Faculty of Natural Sciences, Matej Bel University, Tajovského 40, 97401 Banská Bystrica, Slovakia.

## Table of Contents

|                                                               |     |
|---------------------------------------------------------------|-----|
| (A) Experimental Section .....                                | S3  |
| (A-1) Scope of reagents used .....                            | S3  |
| (A-2) Reaction condition screening .....                      | S5  |
| (B) Characterization of products .....                        | S17 |
| (C) Copies $^1\text{H}$ and $^{13}\text{C}$ NMR spectra ..... | S44 |

## (A) Experimental Section.

Commercially available starting materials, reagents, catalysts, anhydrous and degassed solvents were used without further purification. Flash column chromatography was performed with Merck Silica gel 60 (230-400 mesh). The solvents for column chromatography were distilled before the use. Thin layer chromatography was carried out using Merck TLC Silica gel 60 F<sub>254</sub> and visualized by short-wavelength ultraviolet light or by treatment with potassium permanganate (KMnO<sub>4</sub>) stain. <sup>1</sup>H, <sup>13</sup>C and <sup>19</sup>F NMR spectra were recorded on a Bruker 250, 400 and 500 MHz at 20°C. All <sup>1</sup>H NMR spectra are reported in parts per million (ppm) downfield of TMS and were measured relative to the signals for CHCl<sub>3</sub> (7.26 ppm) and DMSO (2.50 ppm). All <sup>13</sup>C{<sup>1</sup>H} NMR spectra were reported in ppm relative to residual CHCl<sub>3</sub> (77.00 ppm) or DMSO (39.70 ppm) and were obtained with <sup>1</sup>H decoupling. Coupling constants, *J*, are reported in Hertz (Hz). Gas chromatographic analyses was performed on Gas Chromatograph Mass Spectrometer GCMS-QP2010 Ultra instrument. Mechanochemical synthesis was performed using the Retsch MM400 mill using the standard kit. Liquid chemicals were dosed using gas tight micro syringes. Isolation of obtained compounds was achieved by column chromatography on Silica gel. All commercially available compounds were purchased from appropriate vendors.

### A-1. Scope of the reagents used.

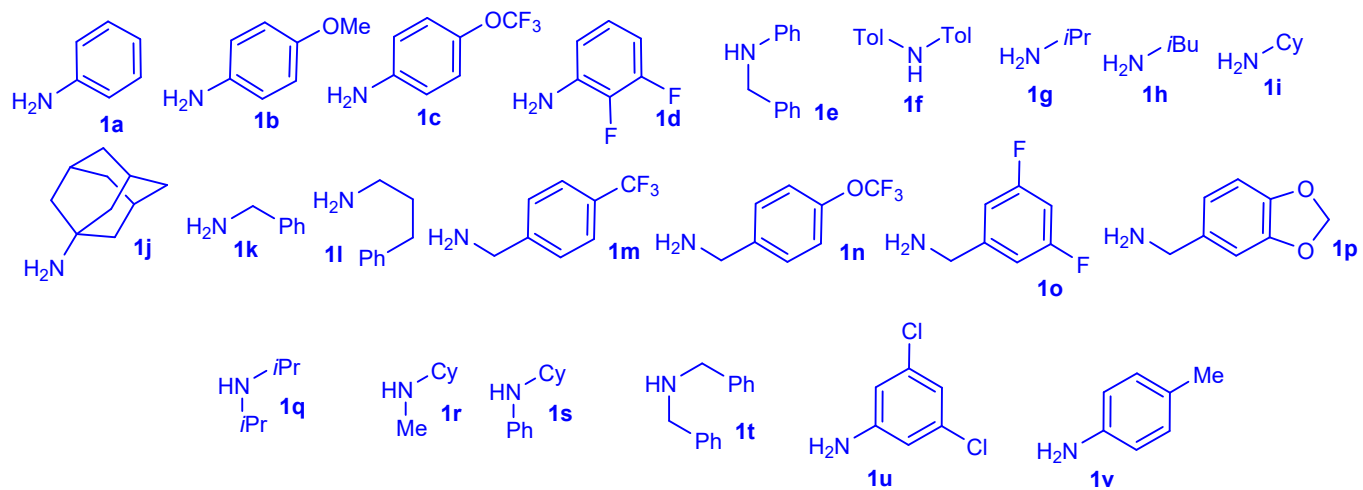

**Scheme S1.** List of amines.

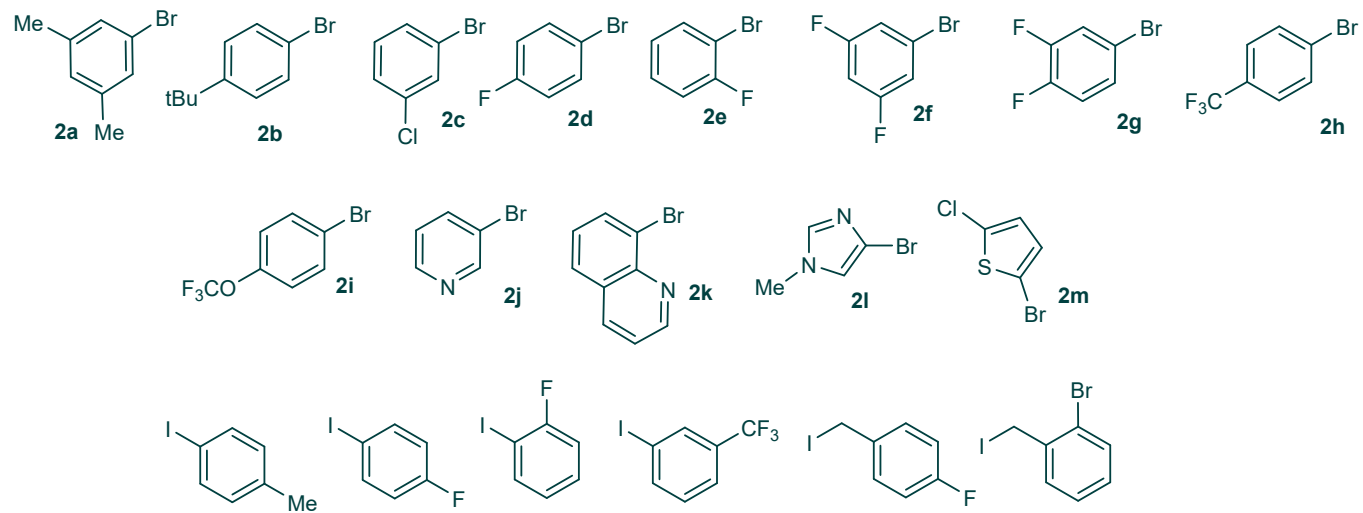

**Scheme S2.** List of aryl bromides and aryl iodides.

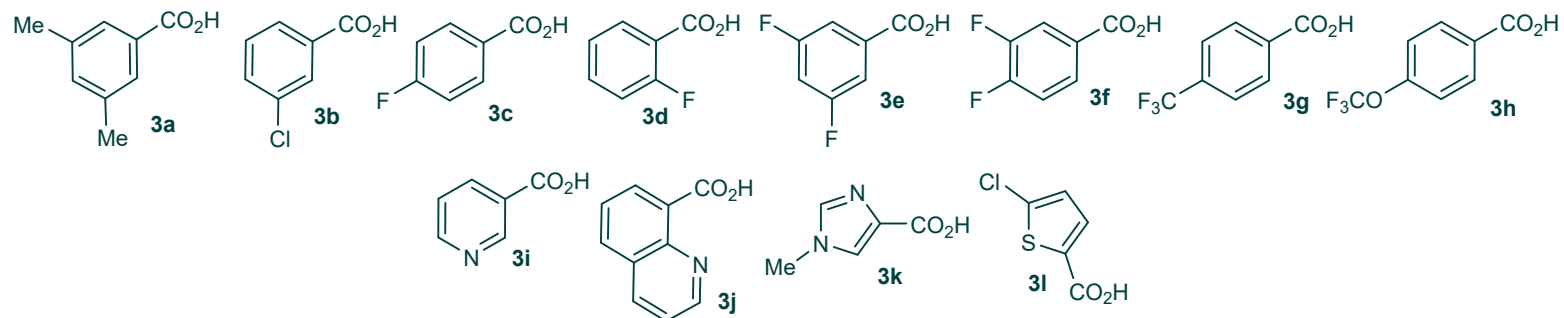

**Scheme S3.** List of aromatic carboxylic acids.

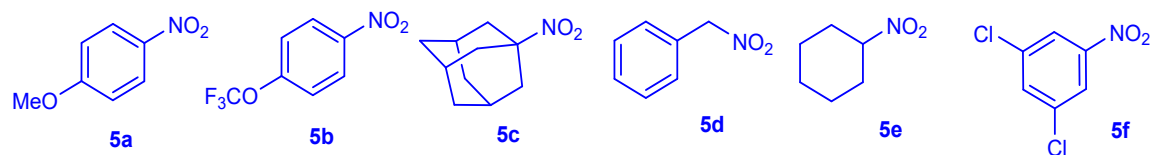

**Scheme S4.** List of nitro compounds.

## A-2. Reaction condition screening for arylation of *ortho*-hydroxyarylenaminones.

**Table S1.** Optimization of the reaction conditions.

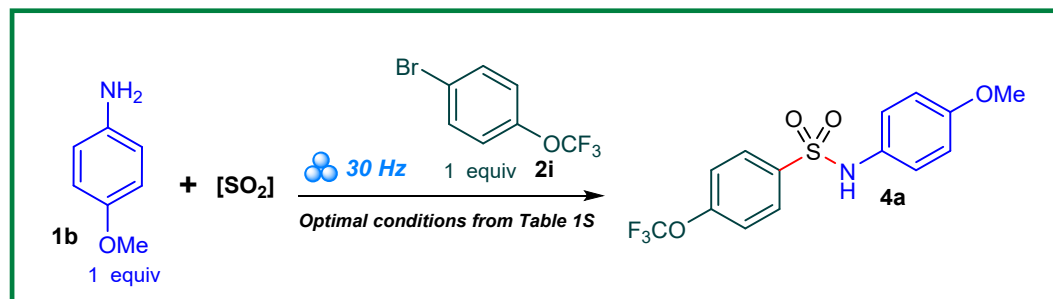

Reaction (a)

| entry                        | reaction components                                                                                                                                                                                              | frequency/time    | yield (%) <b>4a<sup>a</sup></b> |
|------------------------------|------------------------------------------------------------------------------------------------------------------------------------------------------------------------------------------------------------------|-------------------|---------------------------------|
| 1                            | K <sub>2</sub> S <sub>2</sub> O <sub>5</sub> (1.2 equiv.), cucurbit[7]uril (0.05 equiv.), CuBr <sub>2</sub> (0.1 equiv.), r.t.                                                                                   | 30Hz/60min        | 0                               |
| 2                            | K <sub>2</sub> S <sub>2</sub> O <sub>5</sub> (1.2 equiv.), cucurbit[7]uril (0.05 equiv.), CuI (0.1 equiv.), r.t.                                                                                                 | 30Hz/60min        | 0                               |
| 3                            | K <sub>2</sub> S <sub>2</sub> O <sub>5</sub> (1.2 equiv.), cucurbit[7]uril (0.05 equiv.), [RuCl <sub>2</sub> (p-cymene)] <sub>2</sub> (0.1 equiv.), r.t.                                                         | 30Hz/60min        | 20                              |
| 4                            | K <sub>2</sub> S <sub>2</sub> O <sub>5</sub> (1.2 equiv.), cucurbit[7]uril (0.05 equiv.), RuCl <sub>2</sub> (PPh <sub>3</sub> ) <sub>4</sub> (0.1 equiv.), r.t.                                                  | 30Hz/60min        | 35                              |
| 5                            | K <sub>2</sub> S <sub>2</sub> O <sub>5</sub> (1.2 equiv.), cucurbit[7]uril (0.05 equiv.), [Ir(1,5-cod)Cl] <sub>2</sub> (0.03 equiv.), r.t., under Ar.                                                            | 30Hz/60min        | 0                               |
| 6                            | K <sub>2</sub> S <sub>2</sub> O <sub>5</sub> (1.2 equiv.), RhCl(PPh <sub>3</sub> ) <sub>3</sub> (0.05 equiv.), r.t., under Ar.                                                                                   | 30Hz/60min        | 34                              |
| 7                            | K <sub>2</sub> S <sub>2</sub> O <sub>5</sub> (1.2 equiv.), Pd(OAc) <sub>2</sub> (0.05 equiv.), P <sup>t</sup> Bu <sub>3</sub> (0.1 equiv.), r.t., under Ar.                                                      | 30Hz/60min        | 31                              |
| 8                            | K <sub>2</sub> S <sub>2</sub> O <sub>5</sub> (1.2 equiv.), Pd(OAc) <sub>2</sub> (0.05 equiv.), S-Phos (0.1 equiv.), r.t., under Ar.                                                                              | 30Hz/60min        | 37                              |
| 9                            | K <sub>2</sub> S <sub>2</sub> O <sub>5</sub> (1.2 equiv.), Pd <sub>2</sub> (dba) <sub>3</sub> (0.05 equiv.), Xantphos (0.05 equiv.), r.t., under Ar.                                                             | 30Hz/60min        | 44                              |
| 10                           | K <sub>2</sub> S <sub>2</sub> O <sub>5</sub> (1.2 equiv.), PdBr <sub>2</sub> (0.05 equiv.), Xantphos (0.05 equiv.), r.t., under Ar.                                                                              | 30Hz/60min        | 37                              |
| 11                           | K <sub>2</sub> S <sub>2</sub> O <sub>5</sub> (1.2 equiv.), (PPh <sub>3</sub> ) <sub>2</sub> PdCl <sub>2</sub> (0.03 equiv.), r.t.                                                                                | 30Hz/60min        | 43                              |
| 12                           | K <sub>2</sub> S <sub>2</sub> O <sub>5</sub> (1.2 equiv.), cucurbit[7]uril (0.05 equiv.), (PPh <sub>3</sub> ) <sub>2</sub> PdCl <sub>2</sub> (0.03 equiv.), r.t.                                                 | 30Hz/60min        | 81                              |
| <b>13</b>                    | <b>K<sub>2</sub>S<sub>2</sub>O<sub>5</sub> (1.2 equiv.), cucurbit[6]uril (0.05 equiv.), (PPh<sub>3</sub>)<sub>2</sub>PdCl<sub>2</sub> (0.03 equiv.), r.t.</b>                                                    | <b>30Hz/60min</b> | <b>80</b>                       |
| 14                           | DABSO (1.1 equiv.), cucurbit[6]uril (0.05 equiv.), (PPh <sub>3</sub> ) <sub>2</sub> PdCl <sub>2</sub> (0.03 equiv.), r.t.                                                                                        | 30Hz/60min        | 82                              |
| 15                           | K <sub>2</sub> S <sub>2</sub> O <sub>5</sub> (1.2 equiv.), cucurbit[6]uril (0.05 equiv.), RuCl <sub>2</sub> (PPh <sub>3</sub> ) <sub>2</sub> (0.03 equiv.), r.t.                                                 | 30Hz/60min        | 53                              |
| 16                           | K <sub>2</sub> S <sub>2</sub> O <sub>5</sub> (1.2 equiv.), cucurbit[6]uril (0.05 equiv.), (PPh <sub>3</sub> ) <sub>2</sub> NiBr <sub>2</sub> (0.05 equiv.), r.t.                                                 | 30Hz/60min        | 0                               |
| 17                           | K <sub>2</sub> S <sub>2</sub> O <sub>5</sub> (1.2 equiv.), cucurbit[6]uril (0.05 equiv.), (PPh <sub>3</sub> ) <sub>2</sub> NiI <sub>2</sub> (0.05 equiv.), r.t.                                                  | 30Hz/60min        | 0                               |
| 18                           | K <sub>2</sub> S <sub>2</sub> O <sub>5</sub> (1.2 equiv.), cucurbit[6]uril (0.05 equiv.), (PPh <sub>3</sub> ) <sub>2</sub> CoCl <sub>2</sub> (0.05 equiv.), r.t.                                                 | 30Hz/60min        | 0                               |
| <b>Reactions in solution</b> |                                                                                                                                                                                                                  |                   |                                 |
| 19                           | K <sub>2</sub> S <sub>2</sub> O <sub>5</sub> (1.2 equiv.), cucurbit[6]uril (0.05 equiv.), (PPh <sub>3</sub> ) <sub>2</sub> PdCl <sub>2</sub> (0.03 equiv.), r.t., in 1,4-dioxane under Ar.                       | -----/10h         | 0                               |
| 20                           | K <sub>2</sub> S <sub>2</sub> O <sub>5</sub> (1.2 equiv.), cucurbit[6]uril (0.05 equiv.), (PPh <sub>3</sub> ) <sub>2</sub> PdCl <sub>2</sub> (0.03 equiv.), reflux, in 1,4-dioxane under Ar.                     | -----/10h         | 17                              |
| 21                           | K <sub>2</sub> S <sub>2</sub> O <sub>5</sub> (1.2 equiv.), cucurbit[6]uril (0.05 equiv.), (PPh <sub>3</sub> ) <sub>2</sub> PdCl <sub>2</sub> (0.03 equiv.), r.t., in DMF under Ar.                               | -----/10h         | 0                               |
| 22                           | K <sub>2</sub> S <sub>2</sub> O <sub>5</sub> (1.2 equiv.), cucurbit[6]uril (0.05 equiv.), (PPh <sub>3</sub> ) <sub>2</sub> PdCl <sub>2</sub> (0.03 equiv.), 100 °C, in DMF under Ar.                             | -----/10h         | 13                              |
| 23                           | K <sub>2</sub> S <sub>2</sub> O <sub>5</sub> (1.2 equiv.), cucurbit[6]uril (0.05 equiv.), (PPh <sub>3</sub> ) <sub>2</sub> PdCl <sub>2</sub> (0.03 equiv.), r.t., in EtOH under Ar.                              | -----/10h         | 0                               |
| 24                           | K <sub>2</sub> S <sub>2</sub> O <sub>5</sub> (1.2 equiv.), cucurbit[6]uril (0.05 equiv.), (PPh <sub>3</sub> ) <sub>2</sub> PdCl <sub>2</sub> (0.03 equiv.), reflux, in EtOH under Ar.                            | -----/10h         | 31                              |
| 25                           | K <sub>2</sub> S <sub>2</sub> O <sub>5</sub> (1.2 equiv.), cucurbit[6]uril (0.05 equiv.), (PPh <sub>3</sub> ) <sub>2</sub> PdCl <sub>2</sub> (0.03 equiv.), r.t., in CH <sub>2</sub> Cl <sub>2</sub> under Ar.   | -----/10h         | 0                               |
| 26                           | K <sub>2</sub> S <sub>2</sub> O <sub>5</sub> (1.2 equiv.), cucurbit[6]uril (0.05 equiv.), (PPh <sub>3</sub> ) <sub>2</sub> PdCl <sub>2</sub> (0.03 equiv.), reflux, in CH <sub>2</sub> Cl <sub>2</sub> under Ar. | -----/10h         | 0                               |
| 27                           | K <sub>2</sub> S <sub>2</sub> O <sub>5</sub> (1.2 equiv.), cucurbit[6]uril (0.05 equiv.), (PPh <sub>3</sub> ) <sub>2</sub> PdCl <sub>2</sub> (0.03 equiv.), r.t., in NEt <sub>3</sub> under Ar.                  | -----/10h         | 0                               |
| 28                           | K <sub>2</sub> S <sub>2</sub> O <sub>5</sub> (1.2 equiv.), cucurbit[6]uril (0.05 equiv.), (PPh <sub>3</sub> ) <sub>2</sub> PdCl <sub>2</sub> (0.03 equiv.), reflux, in NEt <sub>3</sub> under Ar.                | -----/10h         | 0                               |

<sup>a</sup> Isolated yield.

**Table S2.** Optimization of the reaction conditions.

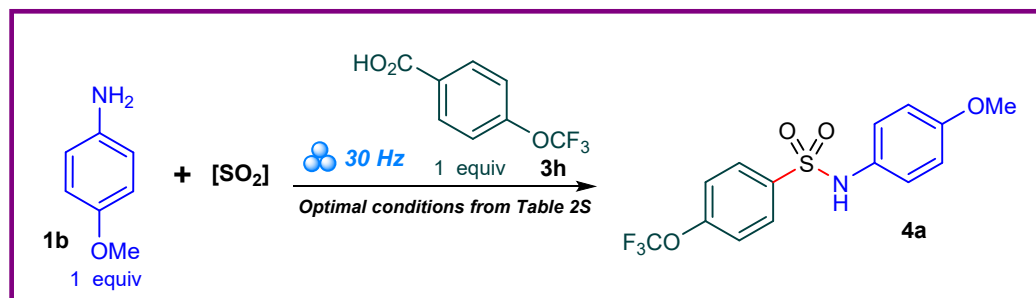

| Reaction (b)          |                                                                                                                                                                                                                                                  |                   |                           |
|-----------------------|--------------------------------------------------------------------------------------------------------------------------------------------------------------------------------------------------------------------------------------------------|-------------------|---------------------------|
| entry                 | reaction components                                                                                                                                                                                                                              | frequency/time    | yield (%) 4a <sup>a</sup> |
| 1                     | K <sub>2</sub> S <sub>2</sub> O <sub>5</sub> (1.2 equiv.), cucurbit[6]uril (0.05 equiv.), (PPh <sub>3</sub> ) <sub>2</sub> PdCl <sub>2</sub> (0.03 equiv.), r.t.                                                                                 | 30Hz/60min        | 17                        |
| 2                     | K <sub>2</sub> S <sub>2</sub> O <sub>5</sub> (1.2 equiv.), cucurbit[6]uril (0.05 equiv.), (PPh <sub>3</sub> ) <sub>2</sub> PdCl <sub>2</sub> (0.03 equiv.), CuI (1.4 equiv.), r.t.                                                               | 30Hz/60min        | 31                        |
| 3                     | K <sub>2</sub> S <sub>2</sub> O <sub>5</sub> (1.2 equiv.), cucurbit[6]uril (0.05 equiv.), (PPh <sub>3</sub> ) <sub>2</sub> PdCl <sub>2</sub> (0.03 equiv.), CuCl <sub>2</sub> (1.4 equiv.), r.t.                                                 | 30Hz/60min        | 37                        |
| 4                     | K <sub>2</sub> S <sub>2</sub> O <sub>5</sub> (1.2 equiv.), cucurbit[6]uril (0.05 equiv.), (PPh <sub>3</sub> ) <sub>2</sub> PdCl <sub>2</sub> (0.03 equiv.), CuO (1.4 equiv.), r.t.                                                               | 30Hz/60min        | 60                        |
| 5                     | <b>K<sub>2</sub>S<sub>2</sub>O<sub>5</sub> (1.2 equiv.), cucurbit[6]uril (0.05 equiv.), (PPh<sub>3</sub>)<sub>2</sub>PdCl<sub>2</sub> (0.03 equiv.), CuBr<sub>2</sub> (1.4 equiv.), r.t.</b>                                                     | <b>30Hz/60min</b> | <b>79</b>                 |
| 6                     | DABSO (1.1 equiv.), cucurbit[6]uril (0.05 equiv.), (PPh <sub>3</sub> ) <sub>2</sub> PdCl <sub>2</sub> (0.03 equiv.), CuBr <sub>2</sub> (1.4 equiv.), r.t.                                                                                        | 30Hz/60min        | 83                        |
| Reactions in solution |                                                                                                                                                                                                                                                  |                   |                           |
| 7                     | K <sub>2</sub> S <sub>2</sub> O <sub>5</sub> (1.2 equiv.), cucurbit[6]uril (0.05 equiv.), (PPh <sub>3</sub> ) <sub>2</sub> PdCl <sub>2</sub> (0.03 equiv.), CuBr <sub>2</sub> (1.4 equiv.), reflux, in 1,4-dioxane under Ar.                     | -----/10h         | 0                         |
| 8                     | K <sub>2</sub> S <sub>2</sub> O <sub>5</sub> (1.2 equiv.), cucurbit[6]uril (0.05 equiv.), (PPh <sub>3</sub> ) <sub>2</sub> PdCl <sub>2</sub> (0.03 equiv.), CuBr <sub>2</sub> (1.4 equiv.), 130 °C, in DMF under Ar.                             | -----/10h         | 19                        |
| 9                     | K <sub>2</sub> S <sub>2</sub> O <sub>5</sub> (1.2 equiv.), cucurbit[6]uril (0.05 equiv.), (PPh <sub>3</sub> ) <sub>2</sub> PdCl <sub>2</sub> (0.03 equiv.), CuBr <sub>2</sub> (1.4 equiv.), reflux, in EtOH under Ar.                            | -----/10h         | 0                         |
| 10                    | K <sub>2</sub> S <sub>2</sub> O <sub>5</sub> (1.2 equiv.), cucurbit[6]uril (0.05 equiv.), (PPh <sub>3</sub> ) <sub>2</sub> PdCl <sub>2</sub> (0.03 equiv.), CuBr <sub>2</sub> (1.4 equiv.), reflux, in CH <sub>2</sub> Cl <sub>2</sub> under Ar. | -----/10h         | 0                         |
| 11                    | K <sub>2</sub> S <sub>2</sub> O <sub>5</sub> (1.2 equiv.), cucurbit[6]uril (0.05 equiv.), (PPh <sub>3</sub> ) <sub>2</sub> PdCl <sub>2</sub> (0.03 equiv.), CuBr <sub>2</sub> (1.4 equiv.), reflux, in NEt <sub>3</sub> under Ar.                | -----/10h         | 0                         |

<sup>a</sup> Isolated yield.

**Table S3.** Optimization of the reaction conditions.

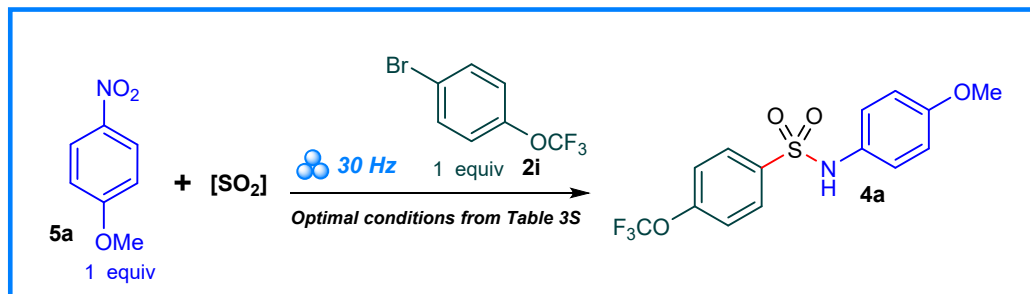

| Reaction (c)          |                                                                                                                                                                                                                  |                   |                           |
|-----------------------|------------------------------------------------------------------------------------------------------------------------------------------------------------------------------------------------------------------|-------------------|---------------------------|
| entry                 | reaction components                                                                                                                                                                                              | frequency/time    | yield (%) 4a <sup>a</sup> |
| 1                     | K <sub>2</sub> S <sub>2</sub> O <sub>5</sub> (1.2 equiv.), cucurbit[6]uril (0.05 equiv.), (PPh <sub>3</sub> ) <sub>2</sub> PdCl <sub>2</sub> (0.03 equiv.), r.t.                                                 | 30Hz/60min        | 21                        |
| 2                     | <b>K<sub>2</sub>S<sub>2</sub>O<sub>5</sub> (4.8 equiv.), cucurbit[6]uril (0.05 equiv.), (PPh<sub>3</sub>)<sub>2</sub>PdCl<sub>2</sub> (0.03 equiv.), r.t.</b>                                                    | <b>30Hz/60min</b> | <b>68</b>                 |
| Reactions in solution |                                                                                                                                                                                                                  |                   |                           |
| 3                     | K <sub>2</sub> S <sub>2</sub> O <sub>5</sub> (4.8 equiv.), cucurbit[6]uril (0.05 equiv.), (PPh <sub>3</sub> ) <sub>2</sub> PdCl <sub>2</sub> (0.03 equiv.), reflux, in 1,4-dioxane under Ar.                     | -----/10h         | 0                         |
| 4                     | K <sub>2</sub> S <sub>2</sub> O <sub>5</sub> (4.8 equiv.), cucurbit[6]uril (0.05 equiv.), (PPh <sub>3</sub> ) <sub>2</sub> PdCl <sub>2</sub> (0.03 equiv.), 130 °C, in DMF under Ar.                             | -----/10h         | 17                        |
| 5                     | K <sub>2</sub> S <sub>2</sub> O <sub>5</sub> (4.8 equiv.), cucurbit[6]uril (0.05 equiv.), (PPh <sub>3</sub> ) <sub>2</sub> PdCl <sub>2</sub> (0.03 equiv.), reflux, in EtOH under Ar.                            | -----/10h         | 33                        |
| 6                     | K <sub>2</sub> S <sub>2</sub> O <sub>5</sub> (4.8 equiv.), cucurbit[6]uril (0.05 equiv.), (PPh <sub>3</sub> ) <sub>2</sub> PdCl <sub>2</sub> (0.03 equiv.), reflux, in CH <sub>2</sub> Cl <sub>2</sub> under Ar. | -----/10h         | 0                         |
| 7                     | K <sub>2</sub> S <sub>2</sub> O <sub>5</sub> (4.8 equiv.), cucurbit[6]uril (0.05 equiv.), (PPh <sub>3</sub> ) <sub>2</sub> PdCl <sub>2</sub> (0.03 equiv.), reflux, in NEt <sub>3</sub> under Ar.                | -----/10h         | 0                         |

<sup>a</sup> Isolated yield.

**Table S4.** Optimization of the reaction conditions.

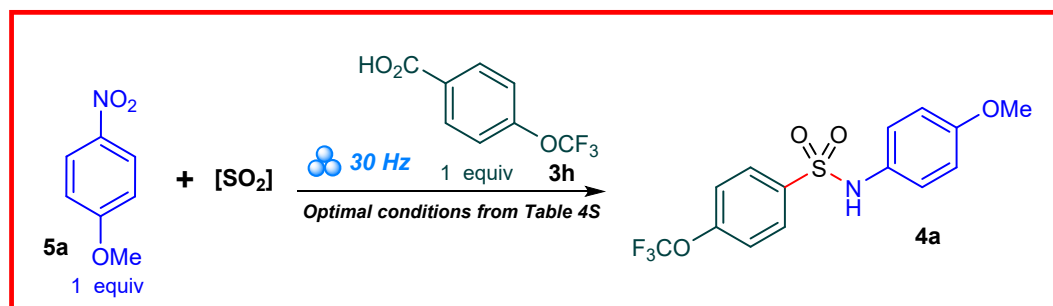

Reaction (d)



| entry                        | reaction components                                                                                                                                                                                                               | frequency/time    | yield (%) <b>4a</b> <sup>a</sup> |
|------------------------------|-----------------------------------------------------------------------------------------------------------------------------------------------------------------------------------------------------------------------------------|-------------------|----------------------------------|
| 1                            | K <sub>2</sub> S <sub>2</sub> O <sub>5</sub> (1.2 equiv.), cucurbit[6]uril (0.05 equiv.), (PPh <sub>3</sub> ) <sub>2</sub> PdCl <sub>2</sub> (0.03 equiv.), CuBr <sub>2</sub> (1.4 equiv.), r.t.                                  | 30Hz/60min        | 17                               |
| 2                            | <b>K<sub>2</sub>S<sub>2</sub>O<sub>5</sub> (4.8 equiv.), cucurbit[6]uril (0.05 equiv.), (PPh<sub>3</sub>)<sub>2</sub>PdCl<sub>2</sub> (0.03 equiv.), CuBr<sub>2</sub> (1.4 equiv.), r.t.</b>                                      | <b>30Hz/60min</b> | <b>61</b>                        |
| <b>Reactions in solution</b> |                                                                                                                                                                                                                                   |                   |                                  |
| 3                            | K <sub>2</sub> S <sub>2</sub> O <sub>5</sub> (4.8 equiv.), cucurbit[6]uril (0.05 equiv.), (PPh <sub>3</sub> ) <sub>2</sub> PdCl <sub>2</sub> (0.03 equiv.), CuBr <sub>2</sub> (1.4 equiv.), reflux, in 1,4-dioxane under Ar.      | -----/10h         | 0                                |
| 4                            | K <sub>2</sub> S <sub>2</sub> O <sub>5</sub> (4.8 equiv.), cucurbit[6]uril (0.05 equiv.), (PPh <sub>3</sub> ) <sub>2</sub> PdCl <sub>2</sub> (0.03 equiv.), CuBr <sub>2</sub> (1.4 equiv.), 130 °C, in DMF under Ar.              | -----/10h         | 21                               |
| 5                            | K <sub>2</sub> S <sub>2</sub> O <sub>5</sub> (4.8 equiv.), cucurbit[6]uril (0.05 equiv.), (PPh <sub>3</sub> ) <sub>2</sub> PdCl <sub>2</sub> (0.03 equiv.), CuBr <sub>2</sub> (1.4 equiv.), reflux, in EtOH under Ar.             | -----/10h         | 0                                |
| 6                            | K <sub>2</sub> S <sub>2</sub> O <sub>5</sub> (4.8 equiv.), cucurbit[6]uril (0.05 equiv.), (PPh <sub>3</sub> ) <sub>2</sub> PdCl <sub>2</sub> (0.03 equiv.), CuBr <sub>2</sub> (1.4 equiv.), reflux, in NEt <sub>3</sub> under Ar. | -----/10h         | 0                                |

<sup>a</sup> Isolated yield.

## Reaction procedures with optimised reaction conditions.

### **General procedure for the synthesis of sulfonamides 4 by the reaction between amines 1, aryl bromides 2 and K<sub>2</sub>S<sub>2</sub>O<sub>5</sub>.**

In air, to 5 mL grinding vessel (made of stainless) equipped with three balls (made of stainless, diameter: 5 mm) was placed consequently an appropriate aryl bromide (1.0 mmol, 1.0 equiv.), K<sub>2</sub>S<sub>2</sub>O<sub>5</sub> (267 mg, 1.2 mmol, 1.2 equiv.), cucurbit[6]uril (50 mg, 0.05 mmol, 0.05 equiv.), (PPh<sub>3</sub>)<sub>2</sub>PdCl<sub>2</sub> (21 mg, 0.03 mmol, 0.03 equiv.); then an appropriate amine (1.0 mmol, 1.0 equiv.) was added and the reaction vessel was properly capped. Finally, the reaction vessel was installed on the mill and subjected to milling at 30 Hz for 60 minutes. After completion of the reaction, the content of the vessel was generously treated with distilled water, filtered and washed two times with distilled water and finally properly dried in vacuum. The resulted crude was directly subjected to gradient flash chromatography on silica gel to isolate the desired compound.

The gram scale synthesis was performed on 10 mmol of the starting amine in 25 mL grinding vessel using three 10 mm balls.

### **General procedure for the synthesis of sulfonamides 4 by the reaction between amines 1, aromatic carboxylic acids 3 and K<sub>2</sub>S<sub>2</sub>O<sub>5</sub>.**

In air, to 5 mL grinding vessel (made of stainless) equipped with three balls (made of stainless, diameter: 5 mm) was placed consequently an appropriate aromatic carboxylic acid (1.0 mmol, 1.0 equiv.), K<sub>2</sub>S<sub>2</sub>O<sub>5</sub> (267 mg, 1.2 mmol, 1.2 equiv.), cucurbit[6]uril (50 mg, 0.05 mmol, 0.05 equiv.), (PPh<sub>3</sub>)<sub>2</sub>PdCl<sub>2</sub> (21 mg, 0.03 mmol, 0.03 equiv.); CuBr<sub>2</sub> (313 mg, 1.4 mmol, 1.4 equiv.); then an appropriate amine (1.0 mmol, 1.0 equiv.) was added

and the reaction vessel was properly capped. Finally, the reaction vessel was installed on the mill and subjected to milling at 30 Hz for 60 minutes. After completion of the reaction, the content of the vessel was generously treated with distilled water, filtered and washed two times with distilled water and finally properly dried in vacuum. The resulted crude was directly subjected to gradient flash chromatography on silica gel to isolate the desired compound.

The gram scale synthesis was performed on 10 mmol of the starting amine in 25 mL grinding vessel using three 10 mm balls.

***General procedure for the synthesis of sulfonamides 4 by the reaction between amines 1, aryl bromides 2 and DABSO.***

In air, to 5 mL grinding vessel (made of stainless) equipped with three balls (made of stainless, diameter: 5 mm) was placed consequently an appropriate aryl bromide (1.0 mmol, 1.0 equiv.), DABSO (264 mg, 1.1 mmol, 1.1 equiv.), cucurbit[6]uril (50 mg, 0.05 mmol, 0.05 equiv.),  $(\text{PPh}_3)_2\text{PdCl}_2$  (21 mg, 0.03 mmol, 0.03 equiv.); then an appropriate amine (1.0 mmol, 1.0 equiv.) was added and the reaction vessel was properly capped. Finally, the reaction vessel was installed on the mill and subjected to milling at 30 Hz for 60 minutes. After completion of the reaction, the content of the vessel was generously treated with distilled water, filtered and washed two times with distilled water and finally properly dried in vacuum. The resulted crude was directly subjected to gradient flash chromatography on silica gel to isolate the desired compound.

The gram scale synthesis was performed on 10 mmol of the starting amine in 25 mL grinding vessel using three 10 mm balls.

***General procedure for the synthesis of sulfonamides 4 by the reaction between amines 1, aromatic carboxylic acids 3 and DABSO.***

In air, to 5 mL grinding vessel (made of stainless) equipped with three balls (made of stainless, diameter: 5 mm) was placed consequently an appropriate aromatic carboxylic acid (1.0 mmol, 1.0 equiv.), DABSO (264 mg, 1.1 mmol, 1.1 equiv.), cucurbit[6]uril (50 mg, 0.05 mmol, 0.05 equiv.),  $(\text{PPh}_3)_2\text{PdCl}_2$  (21 mg, 0.03 mmol, 0.03 equiv.);  $\text{CuBr}_2$  (313 mg, 1.4 mmol, 1.4 equiv.); then an appropriate amine (1.0 mmol, 1.0 equiv.) was added and the reaction vessel was properly capped. Finally, the reaction vessel was installed on the mill and subjected to milling at 30 Hz for 60 minutes. After completion of the reaction, the content of the vessel was generously treated with distilled water, filtered and washed two times with distilled water and finally properly dried in vacuum. The resulted crude was directly subjected to gradient flash chromatography on silica to isolate the desired compound.

The gram scale synthesis was performed on 10 mmol of the starting amine in 25 mL grinding vessel using three 10 mm balls.

***General procedure for the synthesis of sulfonamides 4 by the reaction between nitro compounds 5, aryl bromides 2 and  $K_2S_2O_5$ .***

In air, to 10 mL grinding vessel (made of stainless) equipped with three balls (made of stainless, diameter: 5 mm) was placed consequently an appropriate aryl bromide (1.0 mmol, 1.0 equiv.),  $K_2S_2O_5$  (1.068 g, 4.8 mmol, 4.8 equiv.), cucurbit[6]uril (50 mg, 0.05 mmol, 0.05 equiv.),  $(PPh_3)_2PdCl_2$  (21 mg, 0.03 mmol, 0.03 equiv.); then an appropriate nitro compound (1.0 mmol, 1.0 equiv.) was added and the reaction vessel was properly capped. Finally, the reaction vessel was installed on the mill and subjected to milling at 30 Hz for 60 minutes. After completion of the reaction, the content of the vessel was generously treated with distilled water, filtered and washed two times with distilled water and finally properly dried in vacuum. The resulted crude was directly subjected to gradient flash chromatography on silica to isolate the desired compound. The gram scale synthesis was performed on 10 mmol of the starting amine in 25 mL grinding vessel using three 10 mm balls.

***General procedure for the synthesis of sulfonamides 4 by the reaction between nitro compounds 5, aromatic carboxylic acids 3 and  $K_2S_2O_5$ .***

In air, to 10 mL grinding vessel (made of stainless) equipped with three balls (made of stainless, diameter: 5 mm) was placed consequently an appropriate aromatic carboxylic acid (1.0 mmol, 1.0 equiv.),  $K_2S_2O_5$  (1.068 g, 4.8 mmol, 4.8 equiv.), cucurbit[6]uril (50 mg, 0.05 mmol, 0.05 equiv.),  $(PPh_3)_2PdCl_2$  (21 mg, 0.03 mmol, 0.03 equiv.);  $CuBr_2$  (313 mg, 1.4 mmol, 1.4 equiv.); then an appropriate nitro compound (1.0 mmol, 1.0 equiv.) was added and the reaction vessel was properly capped. Finally, the reaction vessel was installed on the mill and subjected to milling at 30 Hz for 60 minutes. After completion of the reaction, the content of the vessel was generously treated with distilled water, filtered and washed two times with distilled water and finally properly dried in vacuum. The resulted crude was directly subjected to gradient flash chromatography on silica gel to isolate the desired compound.

The gram scale synthesis was performed on 10 mmol of the starting amine in 25 mL grinding vessel using three 10 mm balls.

***General procedure for the synthesis of sulfonamides 4 by the reaction between amines 1, aryl iodides and  $K_2S_2O_5$ .***

In air, to 5 mL grinding vessel (made of stainless) equipped with three balls (made of stainless, diameter: 5 mm) was placed consequently an appropriate aryl iodide (1.0 mmol, 1.0 equiv.),  $K_2S_2O_5$  (267 mg, 1.2 mmol, 1.2 equiv.), cucurbit[6]uril (50 mg, 0.05 mmol, 0.05 equiv.),  $(PPh_3)_2PdCl_2$  (21 mg, 0.03 mmol, 0.03 equiv.); then an appropriate amine (1.0 mmol, 1.0 equiv.) was added and the reaction vessel was properly capped. Finally, the reaction vessel was installed on the mill and subjected to milling at 30 Hz for 60 minutes. After completion of the reaction, the content of the vessel was generously treated with distilled water, filtered and washed two times with distilled water and finally properly dried in vacuum. The resulted crude was directly subjected to gradient flash chromatography on silica gel to isolate the desired compound.

***Procedure for the synthesis of sulfonamide 4aa by the reaction between amine 1t, corresponding aryl palladium bromide intermediate 9 and  $K_2S_2O_5$  (Scheme S6a).***

In air, to 5 mL grinding vessel (made of stainless) equipped with three balls (made of stainless, diameter: 5 mm) was placed consequently the freshly prepared  $CF_3Ph-Pd(PPh_3)_2-Br$  **9** (428 mg, 0.5 mmol, 1.0 equiv.),  $K_2S_2O_5$  (134 mg, 0.6 mmol, 1.2 equiv.), cucurbit[6]uril (25 mg, 0.025 mmol, 0.05 equiv.); then an appropriate amine (99 mg, 0.5 mmol, 1.0 equiv.) was added and the reaction vessel was properly capped. Finally, the reaction vessel was installed on the mill and subjected to milling at 30 Hz for 60 minutes. After completion of the reaction, the content of the vessel was generously treated with distilled water, subsequently extracted two times by dichloromethane. The organic layers were combined washed with water and brine and then dried over  $MgSO_4$ . The dichloromethane solution was concentrated in vacuum and the resulted crude was directly subjected to gradient flash chromatography on silica to isolate the desired compound.

***Procedure for the arylation of p-tolylamine by 1-bromo-4-methylbenzene (Scheme S6b).***

In dry box, to 5 mL grinding vessel (made of stainless) equipped with three balls (made of stainless, diameter: 5 mm) was placed consequently 1-bromo-4-methylbenzene (171 mg, 1.0 mmol, 1.0 equiv.),  $K_2CO_3$  (166 mg, 1.2 mmol, 1.2 equiv.), cucurbit[6]uril (50 mg, 0.05 mmol, 0.05 equiv.),  $(PPh_3)_2PdCl_2$  (21 mg, 0.03 mmol, 0.03 equiv.); then p-tolylamine (107 mg, 1.0 mmol, 1.0 equiv.) was added and the reaction vessel was properly capped. Finally, the reaction vessel was installed on the mill and subjected to milling at 30 Hz for 60 minutes. After completion of the reaction,

the content of the vessel was generously treated with distilled water, subsequently extracted two times by dichloromethane. The organic layers were combined washed with water and brine and then dried over  $\text{MgSO}_4$ . The dichloromethane solution was concentrated in vacuum and the resulted crude was directly subjected to gradient flash chromatography on silica to isolate the desired compound.

***Procedure for the arylation of p-tolylamine by 4-methylbenzoic acid (Scheme S6c).***

In dry box, to 5 mL grinding vessel (made of stainless) equipped with three balls (made of stainless, diameter: 5 mm) was placed consequently an 4-methylbenzoic acid (136 mg, 1.0 mmol, 1.0 equiv.),  $\text{K}_2\text{CO}_3$  (166 mg, 1.2 mmol, 1.2 equiv.), cucurbit[6]uril (50 mg, 0.05 mmol, 0.05 equiv.),  $(\text{PPh}_3)_2\text{PdCl}_2$  (21 mg, 0.03 mmol, 0.03 equiv.);  $\text{CuBr}_2$  (313 mg, 1.4 mmol, 1.4 equiv.); then p-tolylamine (107 mg, 1.0 mmol, 1.0 equiv.) was added and the reaction vessel was properly capped. Finally, the reaction vessel was installed on the mill and subjected to milling at 30 Hz for 60 minutes. After completion of the reaction, the content of the vessel was generously treated with distilled water, filtered and washed two times with distilled water and finally properly dried in vacuum. The resulted crude was directly subjected to gradient flash chromatography on silica gel to isolate the desired compound.

***Procedure for the preparation of 1-(methylsulfonyl)-4-(trifluoromethoxy)benzene 11 by a reaction between 1-bromo-4-(trifluoromethoxy)benzene 10, MeI and  $\text{K}_2\text{S}_2\text{O}_5$  (Scheme S6d).***

In dry box, to 5 mL grinding vessel (made of stainless) equipped with three balls (made of stainless, diameter: 5 mm) was placed consequently 1-bromo-4-(trifluoromethoxy)benzene **10** (241 mg, 1.0 mmol, 1.0 equiv.),  $\text{K}_2\text{S}_2\text{O}_5$  (267 mg, 1.2 mmol, 1.2 equiv.), cucurbit[6]uril (50 mg, 0.05 mmol, 0.05 equiv.),  $(\text{PPh}_3)_2\text{PdCl}_2$  (21 mg, 0.03 mmol, 0.03 equiv.); then MeI (426 mg, 3.0 mmol, 3.0 equiv.) was added and the reaction vessel was properly capped. Finally, the reaction vessel was installed on the mill and subjected to milling at 30 Hz for 60 minutes. After completion of the reaction, the content of the vessel was generously treated with distilled water, subsequently extracted two times by dichloromethane. The organic layers were combined washed with water and brine and then dried over  $\text{MgSO}_4$ . The dichloromethane solution was concentrated in vacuum and the resulted crude was directly subjected to gradient flash chromatography on silica to isolate the desired compound.

***Procedure for the preparation of sulfonyldibenzene 13 by a reaction between bromobenzene 12, phenyl boronic acid and K<sub>2</sub>S<sub>2</sub>O<sub>5</sub> (Scheme S6e).***

In dry box, to 5 mL grinding vessel (made of stainless) equipped with three balls (made of stainless, diameter: 5 mm) was placed consequently bromobenzene **12** (157 mg, 1.0 mmol, 1.0 equiv.), K<sub>2</sub>S<sub>2</sub>O<sub>5</sub> (267 mg, 1.2 mmol, 1.2 equiv.), cucurbit[6]uril (50 mg, 0.05 mmol, 0.05 equiv.), (PPh<sub>3</sub>)<sub>2</sub>PdCl<sub>2</sub> (21 mg, 0.03 mmol, 0.03 equiv.); then phenyl boronic acid (122 mg, 1.0 mmol, 1.0 equiv.) was added and the reaction vessel was properly capped. Finally, the reaction vessel was installed on the mill and subjected to milling at 30 Hz for 60 minutes. After completion of the reaction, the content of the vessel was generously treated with distilled water, subsequently extracted two times by dichloromethane. The organic layers were combined washed with water and brine and then dried over MgSO<sub>4</sub>. The dichloromethane solution was concentrated in vacuum and the resulted crude was directly subjected to gradient flash chromatography on silica to isolate the desired compound.

***Procedure for the synthesis of 3,5-dichloroaniline 1u from nitro compound 5f (Scheme S6f).***

In air, to 10 mL grinding vessel (made of stainless) equipped with three balls (made of stainless, diameter: 5 mm) was placed consequently nitro compound **5f** (192 mg, 1.0 mmol, 1.0 equiv.), K<sub>2</sub>S<sub>2</sub>O<sub>5</sub> (1.068 g, 4.8 mmol, 4.8 equiv.), (PPh<sub>3</sub>)<sub>2</sub>PdCl<sub>2</sub> (21 mg, 0.03 mmol, 0.03 equiv.); then distilled water (0.036 mL, 2.0 mmol, 2.0 equiv.) was added and the reaction vessel was properly capped. Finally, the reaction vessel was installed on the mill and subjected to milling at 30 Hz for 35 minutes. After completion of the reaction, the content of the vessel was generously treated with distilled water and small portion of dichloromethane, subsequently extracted two times by dichloromethane. The organic layers were combined washed with water and brine and then dried over MgSO<sub>4</sub>. The dichloromethane solution was concentrated in vacuum and the resulted crude was directly subjected to gradient flash chromatography on silica to isolate the desired compound.

***Procedure for the synthesis of p-toluidine 1v from 1,2-di-p-tolyldiazene 14 (Scheme S6g).***

In air, to 10 mL grinding vessel (made of stainless) equipped with three balls (made of stainless, diameter: 5 mm) was placed consequently 1,2-di-*p*-tolylidiazene **14** (210 mg, 1.0 mmol, 1.0 equiv.),  $K_2S_2O_5$  (0.53 g, 2.4 mmol, 2.4 equiv.),  $(PPh_3)_2PdCl_2$  (21 mg, 0.03 mmol, 0.03 equiv.); then distilled water (0.036 mL, 2.0 mmol, 2.0 equiv.) was added and the reaction vessel was properly capped. Finally, the reaction vessel was installed on the mill and subjected to milling at 30 Hz for 35 minutes. After completion of the reaction, the content of the vessel was generously treated with distilled water, subsequently extracted two times by dichloromethane. The organic layers were combined washed with water and brine and then dried over  $MgSO_4$ . The dichloromethane solution was concentrated in vacuum and the resulted crude was directly subjected to gradient flash chromatography on silica to isolate the desired compound.

### The reaction mechanisms for the developed synthetic protocols.

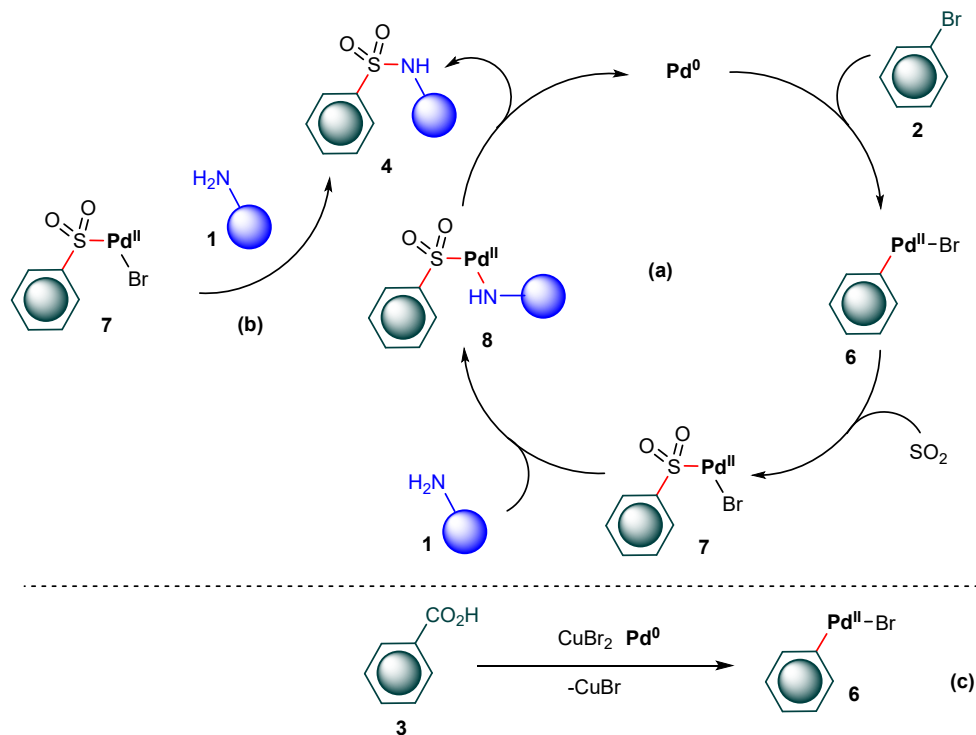

**Scheme S5.** Putative reaction mechanisms for the developed synthetic protocols.

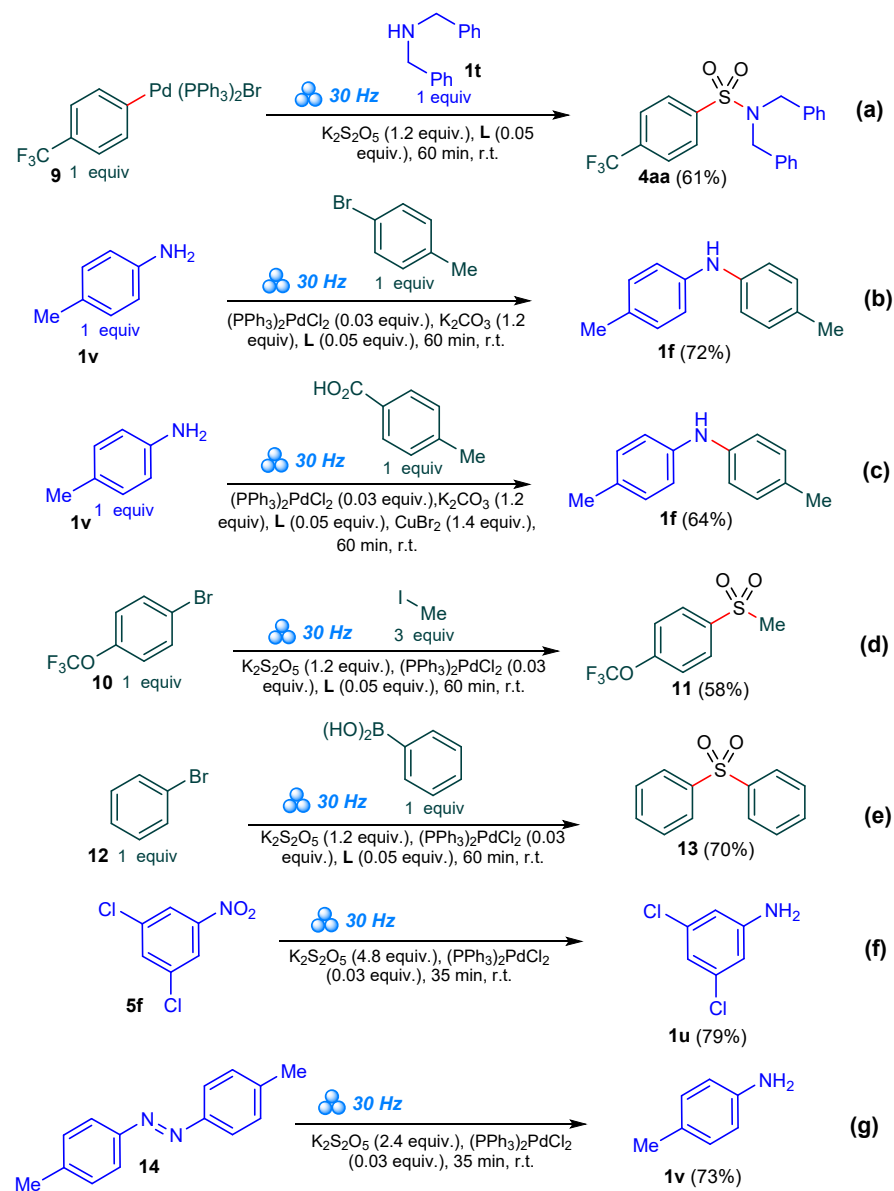

Scheme S6. Control experiments.



**(B) Characterization of products.**

**di-p-tolylamine 1f.**

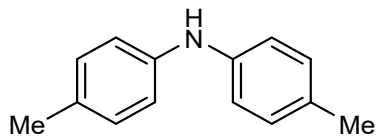

This compound was prepared starting from 1-bromo-4-methylbenzene (171 mg, 1.0 mmol, 1.0 equiv.),  $K_2CO_3$  (166 mg, 1.2 mmol, 1.2 equiv.), cucurbit[6]uril (50 mg, 0.05 mmol, 0.05 equiv.),  $(PPh_3)_2PdCl_2$  (21 mg, 0.03 mmol, 0.03 equiv.) and p-tolylamine **1v** (107 mg, 1.0 mmol, 1.0 equiv.) The purification was performed by column chromatography on silica gel to provide the desired compound **1f** (142 mg, 0.72 mmol, 72%).

Alternatively, the title compound was prepared starting from 4-methylbenzoic acid (136 mg, 1.0 mmol, 1.0 equiv.),  $K_2CO_3$  (166 mg, 1.2 mmol, 1.2 equiv.), cucurbit[6]uril (50 mg, 0.05 mmol, 0.05 equiv.),  $(PPh_3)_2PdCl_2$  (21 mg, 0.03 mmol, 0.03 equiv.);  $CuBr_2$  (313 mg, 1.4 mmol, 1.4 equiv.) and p-tolylamine **1v** (107 mg, 1.0 mmol, 1.0 equiv.). The purification was performed by column chromatography on silica gel to provide the desired compound **1f** (126 mg, 0.64 mmol, 64%).

Colorless solid, mp 79-80 °C.  $^1H$  NMR (500 MHz,  $CDCl_3$ ):  $\delta$  2.44 (s, 6H, 2xMe), 4.46 (br. s, H, NH), 7.08 (d, 4H,  $^3J = 8.4$  Hz,  $CH_{Ar}$ ), 7.21 (d, 4H,  $^3J = 8.4$  Hz,  $CH_{Ar}$ ).

$^{13}C\{^1H\}$  NMR (126 MHz,  $CDCl_3$ ):  $\delta$  20.6, 117.8, 129.7, 129.9, 141.0.

MS (GC, 70eV): m/z (%) = 197 ( $M^+$ , 100), 180 (16), 91 (18).

Anal. calcd. for  $C_{14}H_{15}N$ : C, 85.24; H, 7.66; N, 7.10. Found: C, 85.19; H, 7.48, N, 7.33.

**3,5-dichloroaniline 1u.**

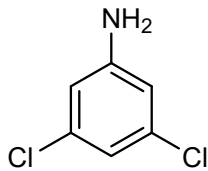

This compound was prepared starting from nitro compound **5f** (192 mg, 1.0 mmol, 1.0 equiv.),  $K_2S_2O_5$  (1.068 g, 4.8 mmol, 4.8 equiv.),  $(PPh_3)_2PdCl_2$  (21 mg, 0.03 mmol, 0.03 equiv.) and distilled water (0.036 mL, 2.0 mmol, 2.0 equiv.). The purification was performed by column chromatography on silica gel to provide the desired compound **1u** (128 mg, 0.79 mmol, 79%).

Colorless solid, mp 49-50 °C.  $^1H$  NMR (500 MHz,  $DMSO-d_6$ ):  $\delta$  3.76 (s, 2H,  $NH_2$ ), 6.52 (d, 2H,  $^4J = 1.7$  Hz,  $CH_{Ar}$ ), 6.72 (t, 1H,  $^4J = 1.7$  Hz,  $CH_{Ar}$ ).

$^{13}C\{^1H\}$  NMR (126 MHz,  $CDCl_3$ ):  $\delta$  113.1, 118.2, 135.3, 148.2.

MS (GC, 70eV):  $m/z$  (%) = 161 ( $M^+$ , 100), 126 (18), 90 (22).

#### *p*-toluidine **1v**.

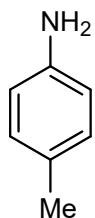

This compound was prepared starting from 1,2-di-*p*-tolylidiazene **14** (210 mg, 1.0 mmol, 1.0 equiv.),  $K_2S_2O_5$  (0.53 g, 2.4 mmol, 2.4 equiv.),  $(PPh_3)_2PdCl_2$  (21 mg, 0.03 mmol, 0.03 equiv.) and distilled water (0.036 mL, 2.0 mmol, 2.0 equiv.). The purification was performed by column chromatography on silica gel to provide the desired compound **1v** (78 mg, 0.73 mmol, 73%).

Colorless solid, mp 41-42 °C.  $^1H$  NMR (500 MHz,  $DMSO-d_6$ ):  $\delta$  2.13 (s, 3H, Me), 4.77 (s, 2H,  $NH_2$ ), 6.47 (d, 2H,  $^3J = 7.7$  Hz,  $CH_{Ar}$ ), 6.81 (d, 2H,  $^3J = 8.4$  Hz,  $CH_{Ar}$ ).

$^{13}C\{^1H\}$  NMR (126 MHz,  $CDCl_3$ ):  $\delta$  20.1, 114.1, 124.0, 129.3, 146.1.

#### *N*-(4-methoxyphenyl)-4-(trifluoromethoxy)benzenesulfonamide **4a**.

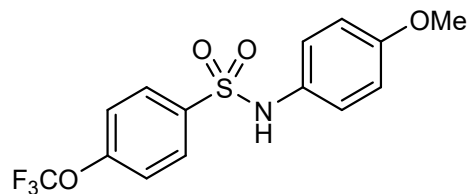

This compound was prepared starting from aryl bromide **2i** (240 mg, 1.0 mmol, 1.0 equiv.),  $K_2S_2O_5$  (267 mg, 1.2 mmol, 1.2 equiv.), cucurbit[6]uril (50 mg, 0.05 mmol, 0.05 equiv.),  $(PPh_3)_2PdCl_2$  (21 mg, 0.03 mmol, 0.03 equiv.) and amine **1b** (123 mg, 1.0 mmol, 1.0 equiv.). The purification was performed by column chromatography on silica gel to provide the desired compound **4a** (278 mg, 0.80 mmol, 80%). The gram scale synthesis was performed on 10 mmol of the starting amine in 25 mL grinding vessel using three 10 mm balls and desired **4a** was prepared in 77% (2.67 g, 7.7 mmol) yield.

Alternatively, the title compound was prepared starting from aromatic carboxylic acid **3h** (206 mg, 1.0 mmol, 1.0 equiv.),  $K_2S_2O_5$  (267 mg, 1.2 mmol, 1.2 equiv.), cucurbit[6]uril (50 mg, 0.05 mmol, 0.05 equiv.),  $(PPh_3)_2PdCl_2$  (21 mg, 0.03 mmol, 0.03 equiv.);  $CuBr_2$  (313 mg, 1.4 mmol, 1.4 equiv.) and amine **1b** (123 mg, 1.0 mmol, 1.0 equiv.). The purification was performed by column chromatography on silica gel to provide the desired compound **4a** (274 mg, 0.79 mmol, 79%). The gram scale synthesis was performed on 10 mmol of the starting amine in 25 mL grinding vessel using three 10 mm balls and desired **4a** was prepared in 72% (2.50 g, 7.2 mmol) yield.

Alternatively, the title compound was prepared starting from aryl bromide **2i** (240 mg, 1.0 mmol, 1.0 equiv.), DABSO (264 mg, 1.1 mmol, 1.1 equiv.), cucurbit[6]uril (50 mg, 0.05 mmol, 0.05 equiv.),  $(PPh_3)_2PdCl_2$  (21 mg, 0.03 mmol, 0.03 equiv.) and amine **1b** (123 mg, 1.0 mmol, 1.0 equiv.). The purification was performed by column chromatography on silica gel to provide the desired compound **4a** (284 mg, 0.82 mmol, 82%). The gram scale synthesis was performed on 10 mmol of the starting amine in 25 mL grinding vessel using three 10 mm balls and desired **4a** was prepared in 74% (2.57 g, 7.4 mmol) yield.

Alternatively, the title compound was prepared starting from aromatic carboxylic acid **3h** (206 mg, 1.0 mmol, 1.0 equiv.), DABSO (264 mg, 1.1 mmol, 1.1 equiv.), cucurbit[6]uril (50 mg, 0.05 mmol, 0.05 equiv.),  $(PPh_3)_2PdCl_2$  (21 mg, 0.03 mmol, 0.03 equiv.);  $CuBr_2$  (313 mg, 1.4 mmol, 1.4 equiv.) and amine **1b** (123 mg, 1.0 mmol, 1.0 equiv.). The purification was performed by column chromatography on silica gel to provide

the desired compound **4a** (288 mg, 0.83 mmol, 83%). The gram scale synthesis was performed on 10 mmol of the starting amine in 25 mL grinding vessel using three 10 mm balls and desired **4a** was prepared in 69% (2.39 g, 6.9 mmol) yield.

Alternatively, the title compound was prepared starting from aryl bromide **2i** (240 mg, 1.0 mmol, 1.0 equiv.),  $K_2S_2O_5$  (1.068 g, 4.8 mmol, 1.2 equiv.), cucurbit[6]uril (50 mg, 0.05 mmol, 0.05 equiv.),  $(PPh_3)_2PdCl_2$  (21 mg, 0.03 mmol, 0.03 equiv.) and nitro compound **5a** (153 mg, 1.0 mmol, 1.0 equiv.). The purification was performed by column chromatography on silica gel to provide the desired compound **4a** (236 mg, 0.68 mmol, 68%).

Alternatively, the title compound was prepared starting from aromatic carboxylic acid **3h** (206 mg, 1.0 equiv.),  $K_2S_2O_5$  (1.068 g, 4.8 mmol, 1.2 equiv.), cucurbit[6]uril (50 mg, 0.05 mmol, 0.05 equiv.),  $(PPh_3)_2PdCl_2$  (21 mg, 0.03 mmol, 0.03 equiv.);  $CuBr_2$  (313 mg, 1.4 mmol, 1.4 equiv.) and nitro compound **5a** (153 mg, 1.0 mmol, 1.0 equiv.). The purification was performed by column chromatography on silica gel to provide the desired compound **4a** (212 mg, 0.61 mmol, 61%).

Yellow solid, mp 99 - 100 °C.  $^1H$  NMR (500 MHz,  $CDCl_3$ ):  $\delta$  3.84 (s, 3H, OMe), 6.88 (d, 2H,  $^3J = 8.8$  Hz,  $CH_{Ar}$ ), 6.92 (d, 2H,  $^3J = 8.8$  Hz,  $CH_{Ar}$ ), 7.54 (d, 2H,  $^3J = 7.5$  Hz,  $CH_{Ar}$ ), 7.64 (t, 2H,  $^3J = 7.9$  Hz,  $CH_{Ar}$ ), 7.76 (s, 2H,  $CH_{Ar}$ ), 7.94 (d, 2H,  $^3J = 7.5$  Hz,  $CH_{Ar}$ ).

$^{13}C\{^1H\}$  NMR (126 MHz,  $CDCl_3$ ):  $\delta$  55.5, 114.8, 120.3 (q,  $^1J_{CF} = 256.2$  Hz), 121.3, 125.7, 126.6, 126.9, 130.8, 132.4, 141.0, 149.0, 161.3.

HRMS (TOF MS ES+) m/z:  $[M - H]^+$ : Calcd for  $C_{14}H_{11}NO_4SF_3$  346.0363. Found 346.0361.

#### ***N,N*-di-*p*-tolylpyridine-3-sulfonamide **4b**.**

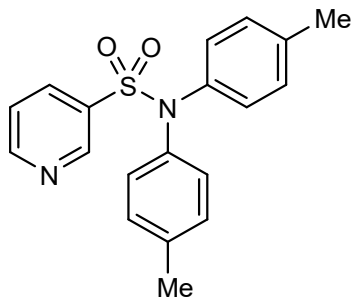

This compound was prepared starting from aryl bromide **2j** (157 mg, 1.0 mmol, 1.0 equiv.),  $K_2S_2O_5$  (267 mg, 1.2 mmol, 1.2 equiv.), cucurbit[6]uril (50 mg, 0.05 mmol, 0.05 equiv.),  $(PPh_3)_2PdCl_2$  (21 mg, 0.03 mmol, 0.03 equiv.) and amine **1f** (197 mg, 1.0 mmol, 1.0 equiv.). The purification was

performed by column chromatography on silica gel to provide the desired compound **4b** (274 mg, 0.81 mmol, 81%). The gram scale synthesis was performed on 10 mmol of the starting amine in 25 mL grinding vessel using three 10 mm balls and desired **4b** was prepared in 80% (3.10 g, 8.0 mmol) yield.

Alternatively, the title compound was prepared starting from aromatic carboxylic acid **3i** (123 mg, 1.0 mmol, 1.0 equiv.),  $K_2S_2O_5$  (267 mg, 1.2 mmol, 1.2 equiv.), cucurbit[6]uril (50 mg, 0.05 mmol, 0.05 equiv.),  $(PPh_3)_2PdCl_2$  (21 mg, 0.03 mmol, 0.03 equiv.);  $CuBr_2$  (313 mg, 1.4 mmol, 1.4 equiv.) and amine **1f** (197 mg, 1.0 mmol, 1.0 equiv.). The purification was performed by column chromatography on silica gel to provide the desired compound **4b** (294 mg, 0.87 mmol, 87%). The gram scale synthesis was performed on 10 mmol of the starting amine in 25 mL grinding vessel using three 10 mm balls and desired **4b** was prepared in 80% (3.10 g, 8.0 mmol) yield.

Yellowish solid, mp 118 - 120 °C.  $^1H$  NMR (500 MHz,  $DMSO-d_6$ ):  $\delta$  2.32 (s, 6H, 2xMe), 7.11 – 7.16 (m, 8H,  $CH_{Ar}$ ), 7.41 – 7.44 (m, 1H,  $CH_{Ar}$ ), 7.95 (dt, 1H,  $^3J = 8.0$  Hz,  $^4J = 1.8$  Hz,  $CH_{Ar}$ ), 8.80 (d, 1H,  $^3J = 4.6$  Hz,  $CH_{Ar}$ ), 8.91 (dd, 1H,  $^4J = 2.0$  Hz,  $CH_{Ar}$ ).

$^{13}C\{^1H\}$  NMR (126 MHz,  $DMSO-d_6$ ):  $\delta$  21.0, 123.5, 128.1, 130.1, 135.3, 137.0, 138.0, 138.3, 148.5, 153.1.

HRMS (TOF MS ES+) m/z:  $[M + H]^+$ : Calcd for  $C_{19}H_{19}N_2O_2S$  339.1175. Found 339.1167.

#### *N*-benzyl-*N*-phenylquinoline-8-sulfonamide **4c**.

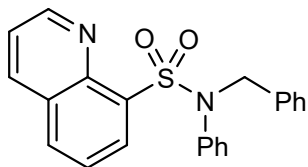

This compound was prepared starting from aryl bromide **2k** (207 mg, 1.0 mmol, 1.0 equiv.),  $K_2S_2O_5$  (267 mg, 1.2 mmol, 1.2 equiv.), cucurbit[6]uril (50 mg, 0.05 mmol, 0.05 equiv.),  $(PPh_3)_2PdCl_2$  (21 mg, 0.03 mmol, 0.03 equiv.) and amine **1e** (183 mg, 1.0 mmol, 1.0 equiv.). The purification was performed by column chromatography on silica gel to provide the desired compound **4c** (337 mg, 0.90 mmol, 90%).

Alternatively, the title compound was prepared starting from aromatic carboxylic acid **3j** (173 mg, 1.0 mmol, 1.0 equiv.),  $K_2S_2O_5$  (267 mg, 1.2 mmol, 1.2 equiv.), cucurbit[6]uril (50 mg, 0.05 mmol, 0.05 equiv.),  $(PPh_3)_2PdCl_2$  (21 mg, 0.03 mmol, 0.03 equiv.);  $CuBr_2$  (313 mg, 1.4 mmol, 1.4

equiv.) and amine **1e** (183 mg, 1.0 mmol, 1.0 equiv.). The purification was performed by column chromatography on silica gel to provide the desired compound **4c** (310 mg, 0.83 mmol, 83%).

Yellowish solid, mp 167 - 170 °C.  $^1\text{H NMR}$  (500 MHz, DMSO- $d_6$ ):  $\delta$  5.40 (s, 2H, CH<sub>2</sub>), 6.94 (d, 2H,  $^3J = 7.4$  Hz, CH<sub>Ar</sub>), 7.05 – 7.10 (m, 3H, CH<sub>Ar</sub>), 7.22 – 7.24 (m, 1H, CH<sub>Ar</sub>), 7.30 (t, 2H,  $^3J = 7.9$  Hz, CH<sub>Ar</sub>), 7.36 (d, 2H,  $^3J = 7.5$  Hz, CH<sub>Ar</sub>), 7.63 (t, 1H,  $^3J = 7.6$  Hz, CH<sub>Ar</sub>), 7.77 – 7.79 (m, 1H, CH<sub>Ar</sub>), 8.19 (dd, 1H,  $^3J = 7.4$  Hz,  $^4J = 1.2$  Hz, CH<sub>Ar</sub>), 8.28 (d, 1H,  $^3J = 7.8$  Hz, CH<sub>Ar</sub>), 8.58 (dd, 1H,  $^3J = 8.4$  Hz,  $^4J = 1.7$  Hz, CH<sub>Ar</sub>), 9.24 – 9.25 (m, 1H, CH<sub>Ar</sub>).

$^{13}\text{C}\{^1\text{H}\}$  NMR (126 MHz, DMSO- $d_6$ ):  $\delta$  56.4, 122.6, 125.6, 127.1, 127.2, 127.8, 127.9, 128.3, 128.6, 128.8, 133.0, 134.3, 136.2, 137.1, 138.1, 139.0, 143.2, 151.7.

HRMS (TOF MS ES+)  $m/z$ : [M + H]<sup>+</sup>: Calcd for C<sub>22</sub>H<sub>19</sub>N<sub>2</sub>O<sub>2</sub>S 375.1178. Found 375.1167.

#### **5-chloro-N-(2,3-difluorophenyl)thiophene-2-sulfonamide 4d.**

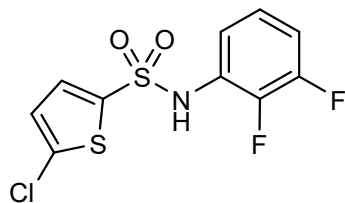

This compound was prepared starting from aryl bromide **2m** (196 mg, 1.0 mmol, 1.0 equiv.), K<sub>2</sub>S<sub>2</sub>O<sub>5</sub> (267 mg, 1.2 mmol, 1.2 equiv.), cucurbit[6]uril (50 mg, 0.05 mmol, 0.05 equiv.), (PPh<sub>3</sub>)<sub>2</sub>PdCl<sub>2</sub> (21 mg, 0.03 mmol, 0.03 equiv.) and amine **1d** (129 mg, 1.0 mmol, 1.0 equiv.). The purification was performed by column chromatography on silica gel to provide the desired compound **4d** (222 mg, 0.72 mmol, 72%).

Alternatively, the title compound was prepared starting from aromatic carboxylic acid **3l** (162 mg, 1.0 mmol, 1.0 equiv.), K<sub>2</sub>S<sub>2</sub>O<sub>5</sub> (267 mg, 1.2 mmol, 1.2 equiv.), cucurbit[6]uril (50 mg, 0.05 mmol, 0.05 equiv.), (PPh<sub>3</sub>)<sub>2</sub>PdCl<sub>2</sub> (21 mg, 0.03 mmol, 0.03 equiv.); CuBr<sub>2</sub> (313 mg, 1.4 mmol, 1.4 equiv.) and amine **1d** (129 mg, 1.0 mmol, 1.0 equiv.). The purification was performed by column chromatography on silica to provide the desired compound **4d** (229 mg, 0.74 mmol, 74%).

Light brown solid, mp 129- 130 °C.  $^1\text{H NMR}$  (500 MHz, CDCl<sub>3</sub>):  $\delta$  6.97 – 7.00 (m, 2H, NH, CH<sub>Ar</sub>), 7.15 (q, 1H,  $^3J = 5.4$  Hz, CH<sub>Ar</sub>), 7.33 (q, 1H,  $^3J = 8.1$  Hz, CH<sub>Ar</sub>), 7.59 (q, 2H,  $^4J = 3.7$  Hz, CH<sub>Ar</sub>).

$^{13}\text{C}\{^1\text{H}\}$  NMR (126 MHz,  $\text{CDCl}_3$ ):  $\delta$  120.3 (d,  $J_{\text{CF}} = 16.8$  Hz), 123.1 (d,  $J_{\text{CF}} = 9.9$  Hz), 124.0 (m), 127.0, 127.8, 135.6, 135.9, 141.1, 148.8 (dd,  $^1J_{\text{CF}} = 260.7$  Hz,  $J_{\text{CF}} = 12.8$  Hz), 151.0 (dd,  $^1J_{\text{CF}} = 254.3$  Hz,  $J_{\text{CF}} = 11.4$  Hz).

HRMS (TOF MS ES+)  $m/z$ :  $[\text{M} - \text{H}]^+$ : Calcd for  $\text{C}_{10}\text{H}_5\text{NO}_2\text{S}_2\text{F}_2\text{Cl}$  307.9426. Found 307.9418.

**5-chloro-N-(4-(trifluoromethoxy)phenyl)thiophene-2-sulfonamide 4e.**

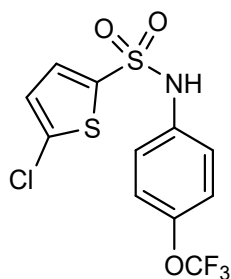

This compound was prepared starting from aryl bromide **2m** (196 mg, 1.0 mmol, 1.0 equiv.),  $\text{K}_2\text{S}_2\text{O}_5$  (267 mg, 1.2 mmol, 1.2 equiv.), cucurbit[6]uril (50 mg, 0.05 mmol, 0.05 equiv.),  $(\text{PPh}_3)_2\text{PdCl}_2$  (21 mg, 0.03 mmol, 0.03 equiv.) and amine **1c** (177 mg, 1.0 mmol, 1.0 equiv.). The purification was performed by column chromatography on silica gel to provide the desired compound **4e** (303 mg, 0.85 mmol, 85%).

Alternatively, the title compound was prepared starting from aromatic carboxylic acid **3l** (162 mg, 1.0 mmol, 1.0 equiv.),  $\text{K}_2\text{S}_2\text{O}_5$  (267 mg, 1.2 mmol, 1.2 equiv.), cucurbit[6]uril (50 mg, 0.05 mmol, 0.05 equiv.),  $(\text{PPh}_3)_2\text{PdCl}_2$  (21 mg, 0.03 mmol, 0.03 equiv.);  $\text{CuBr}_2$  (313 mg, 1.4 mmol, 1.4 equiv.) and amine **1c** (177 mg, 1.0 mmol, 1.0 equiv.). The purification was performed by column chromatography on silica gel to provide the desired compound **4e** (289 mg, 0.81 mmol, 81%).

Alternatively, the title compound was prepared starting from aryl bromide **2m** (196 mg, 1.0 mmol, 1.0 equiv.), DABSO (264 mg, 1.1 mmol, 1.1 equiv.), cucurbit[6]uril (50 mg, 0.05 mmol, 0.05 equiv.),  $(\text{PPh}_3)_2\text{PdCl}_2$  (21 mg, 0.03 mmol, 0.03 equiv.) and amine **1c** (177 mg, 1.0 mmol, 1.0 equiv.). The purification was performed by column chromatography on silica gel to provide the desired compound **4e** (260 mg, 0.73 mmol, 73%).

Alternatively, the title compound was prepared starting from aromatic carboxylic acid **3l** (162 mg, 1.0 mmol, 1.0 equiv.), DABSO (264 mg, 1.1 mmol, 1.1 equiv.), cucurbit[6]uril (50 mg, 0.05 mmol, 0.05 equiv.),  $(\text{PPh}_3)_2\text{PdCl}_2$  (21 mg, 0.03 mmol, 0.03 equiv.);  $\text{CuBr}_2$  (313 mg, 1.4 mmol, 1.4



equiv.) and amine **1c** (177 mg, 1.0 mmol, 1.0 equiv.). The purification was performed by column chromatography on silica gel to provide the desired compound **4e** (281 mg, 0.79 mmol, 79%).

Alternatively, the title compound was prepared starting from aryl bromide **2m** (196 mg, 1.0 mmol, 1.0 equiv.),  $K_2S_2O_5$  (1.068 g, 4.8 mmol, 4.8 equiv.), cucurbit[6]uril (50 mg, 0.05 mmol, 0.05 equiv.),  $(PPh_3)_2PdCl_2$  (21 mg, 0.03 mmol, 0.03 equiv.) and nitro compound **5b** (207 mg, 1.0 mmol, 1.0 equiv.). The purification was performed by column chromatography on silica gel to provide the desired compound **4e** (207 mg, 0.58 mmol, 58%).

Alternatively, the title compound was prepared starting from aromatic carboxylic acid **3l** (162 mg, 1.0 equiv.),  $K_2S_2O_5$  (1.068 g, 4.8 mmol, 4.8 equiv.), cucurbit[6]uril (50 mg, 0.05 mmol, 0.05 equiv.),  $(PPh_3)_2PdCl_2$  (21 mg, 0.03 mmol, 0.03 equiv.);  $CuBr_2$  (313 mg, 1.4 mmol, 1.4 equiv.) and nitro compound **5b** (207 mg, 1.0 mmol, 1.0 equiv.). The purification was performed by column chromatography on silica gel to provide the desired compound **4e** (225 mg, 0.63 mmol, 63%).

Yellow solid, mp 173 - 174 °C.  $^1H$  NMR (500 MHz,  $CDCl_3$ ):  $\delta$  7.00 (d, 2H,  $^4J = 3.2$  Hz,  $CH_{Ar}$ ), 7.18 (d, 2H,  $^3J = 8.3$  Hz,  $CH_{Ar}$ ), 7.25 (d, 2H,  $^3J = 8.3$  Hz,  $CH_{Ar}$ ), 7.56 (d, 2H,  $^4J = 3.2$  Hz,  $CH_{Ar}$ ).

$^{13}C\{^1H\}$  NMR (126 MHz,  $CDCl_3$ ):  $\delta$  120.2 (q,  $^1J_{CF} = 257.1$  Hz), 127.0, 131.7, 132.7, 135.4, 136.1, 140.8, 150.7.

MS (GC, 70eV):  $m/z$  (%) = 357 ( $M^+$ , 0.2), 298 (39), 292 (34), 257 (15), 183 (41), 181 (100), 133 (24), 105 (56).

Anal. calcd. for  $C_{11}H_7NO_3S_2F_3Cl$ : C, 36.93; H, 1.97; N, 3.92. Found: C, 36.99; H, 2.01, N, 3.92.

#### **1-methyl-N,N-di-p-tolyl-1H-imidazole-4-sulfonamide 4f.**

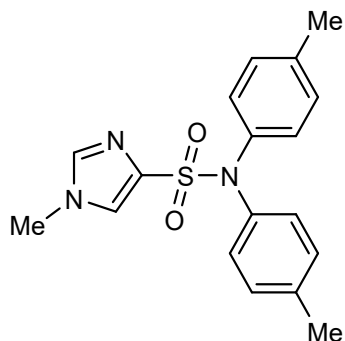

This compound was prepared starting from aryl bromide **2i** (160 mg, 1.0 mmol, 1.0 equiv.),  $K_2S_2O_5$  (267 mg, 1.2 mmol, 1.2 equiv.), cucurbit[6]uril (50 mg, 0.05 mmol, 0.05 equiv.),  $(PPh_3)_2PdCl_2$  (21 mg, 0.03 mmol, 0.03 equiv.) and amine **1f** (197 mg, 1.0 mmol, 1.0 equiv.). The purification was performed by column chromatography on silica gel to provide the desired compound **4f** (300 mg, 0.88 mmol, 88%).

Alternatively, the title compound was prepared starting from aromatic carboxylic acid **3k** (126 mg, 1.0 mmol, 1.0 equiv.),  $K_2S_2O_5$  (267 mg, 1.2 mmol, 1.2 equiv.), cucurbit[6]uril (50 mg, 0.05 mmol, 0.05 equiv.),  $(PPh_3)_2PdCl_2$  (21 mg, 0.03 mmol, 0.03 equiv.);  $CuBr_2$  (313 mg, 1.4 mmol, 1.4 equiv.) and amine **1f** (197 mg, 1.0 mmol, 1.0 equiv.). The purification was performed by column chromatography on silica gel to provide the desired compound **4f** (280 mg, 0.82 mmol, 82%).

Yellowish solid, mp 120 - 121 °C.  $^1H$  NMR (500 MHz,  $CDCl_3$ ):  $\delta$  2.29 (s, 6H, 2xMe), 3.60 (s, 3H, Me), 7.09 (d, 4H,  $^3J = 7.2$  Hz,  $CH_{Ar}$ ), 7.24 (s, 1H, Imidazole), 7.36 (dd, 4H,  $^3J = 8.4$  Hz,  $^4J = 1.8$  Hz,  $CH_{Ar}$ ), 7.50 (s, 1H, Imidazole).

$^{13}C\{^1H\}$  NMR (126 MHz,  $CDCl_3$ ):  $\delta$  20.9, 33.8, 117.8, 125.4, 128.1, 129.6, 136.7, 138.9, 139.1, 139.7.

MS (GC, 70eV):  $m/z$  (%) = 341 ( $M^+$ , 22), 197 (16), 196 (100), 181 (63).

Anal. calcd. for  $C_{18}H_{19}N_3O_2S$ : C, 63.32; H, 5.61; N, 12.31; Found: C, 63.18; H, 5.65; N, 12.37.

#### **1-methyl-N-phenyl-1H-imidazole-4-sulfonamide 4g.**

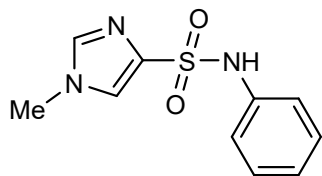

This compound was prepared starting from aryl bromide **2i** (160 mg, 1.0 mmol, 1.0 equiv.),  $K_2S_2O_5$  (267 mg, 1.2 mmol, 1.2 equiv.), cucurbit[6]uril (50 mg, 0.05 mmol, 0.05 equiv.),  $(PPh_3)_2PdCl_2$  (21 mg, 0.03 mmol, 0.03 equiv.) and amine **1a** (93 mg, 1.0 mmol, 1.0 equiv.). The purification was performed by column chromatography on silica gel to provide the desired compound **4g** (199 mg, 0.84 mmol, 84%).

White solid, mp 203 - 204 °C.  $^1H$  NMR (500 MHz,  $DMSO-d_6$ ):  $\delta$  3.67 (s, 3H, Me), 7.00 (t, 1H,  $^3J = 7.5$  Hz,  $CH_{Ar}$ ), 7.19 - 7.20 (m, 2H,  $CH_{Ar}$ ), 7.23 - 7.26 (m, 2H,  $CH_{Ar}$ ), 7.76 (d, 1H,  $^4J = 0.8$  Hz, Imidazole), 7.85 (d, 1H,  $^4J = 1.0$  Hz, Imidazole), 10.27 (s, 1H, NH).

$^{13}C\{^1H\}$  NMR (126 MHz,  $DMSO-d_6$ ):  $\delta$  33.5, 119.1, 123.2, 125.4, 128.9, 138.2, 138.5, 139.8.

MS (GC, 70eV): m/z (%) = 237 (M<sup>+</sup>, 96), 173 (39), 145 (72), 132 (69), 92 (52), 65 (70), 42 (100).

Anal. calcd. for C<sub>10</sub>H<sub>11</sub>N<sub>3</sub>O<sub>2</sub>S: C, 50.62; H, 4.67; N, 17.71; Found: C, 50.69; H, 4.73; N, 17.63.

**4-(tert-butyl)-N-(3,5-difluorobenzyl)benzenesulfonamide 4h.**

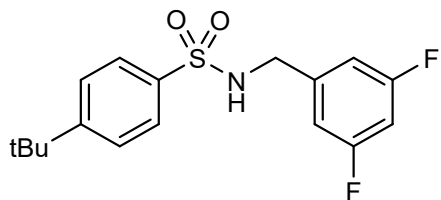

This compound was prepared starting from aryl bromide **2b** (212 mg, 1.0 mmol, 1.0 equiv.), K<sub>2</sub>S<sub>2</sub>O<sub>5</sub> (267 mg, 1.2 mmol, 1.2 equiv.), cucurbit[6]uril (50 mg, 0.05 mmol, 0.05 equiv.), (PPh<sub>3</sub>)<sub>2</sub>PdCl<sub>2</sub> (21 mg, 0.03 mmol, 0.03 equiv.) and amine **1o** (143 mg, 1.0 mmol, 1.0 equiv.). The purification was performed by column chromatography on silica gel to provide the desired compound **4h** (305 mg, 0.90 mmol, 90%).

White solid, mp 99- 100 °C. **<sup>1</sup>H NMR** (500 MHz, CDCl<sub>3</sub>): δ 1.31 (s, 9H, tBu), 4.17 (d, 2H, <sup>3</sup>J = 4.5 Hz, CH<sub>2</sub>), 5.43 (s, 1H, NH), 6.59 – 6.64 (m, 1H, CH<sub>Ar</sub>), 6.67 – 6.72 (m, 1H, CH<sub>Ar</sub>), 7.17 – 7.22 (m, 1H, CH<sub>Ar</sub>), 7.41 (d, 2H, <sup>3</sup>J = 8.5 Hz, CH<sub>Ar</sub>), 7.69 (d, 2H, <sup>3</sup>J = 8.5 Hz, CH<sub>Ar</sub>).

**<sup>13</sup>C{<sup>1</sup>H} NMR** (126 MHz, CDCl<sub>3</sub>): δ 31.0, 35.0, 40.7, 103.6 (t, J<sub>CF</sub> = 26.7 Hz), 111.1 (dd, J<sub>CF</sub> = 21.3 Hz, J<sub>CF</sub> = 3.8 Hz), 119.6 (m), 125.9, 126.8, 131.0 (m), 136.8, 156.4, 160.5 (dd, <sup>1</sup>J<sub>CF</sub> = 235.6 Hz, J<sub>CF</sub> = 12.2 Hz), 162.5 (dd, <sup>1</sup>J<sub>CF</sub> = 236.5 Hz, J<sub>CF</sub> = 12.2 Hz).

HRMS (TOF MS ES-) m/z: [M - H]<sup>+</sup>: Calcd for C<sub>17</sub>H<sub>18</sub>NO<sub>2</sub>SF<sub>2</sub> (M-H) 338.1026. Found 338.1026.

**3,5-dimethyl-N-(4-(trifluoromethyl)benzyl)benzenesulfonamide 4i.**

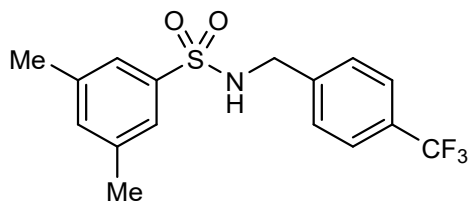

This compound was prepared starting from aryl bromide **2a** (184 mg, 1.0 mmol, 1.0 equiv.),  $K_2S_2O_5$  (267 mg, 1.2 mmol, 1.2 equiv.), cucurbit[6]uril (50 mg, 0.05 mmol, 0.05 equiv.),  $(PPh_3)_2PdCl_2$  (21 mg, 0.03 mmol, 0.03 equiv.) and amine **1m** (191 mg, 1.0 mmol, 1.0 equiv.). The purification was performed by column chromatography on silica gel to provide the desired compound **4i** (312 mg, 0.91 mmol, 91%).

Alternatively, the title compound was prepared starting from aromatic carboxylic acid **3a** (150 mg, 1.0 mmol, 1.0 equiv.),  $K_2S_2O_5$  (267 mg, 1.2 mmol, 1.2 equiv.), cucurbit[6]uril (50 mg, 0.05 mmol, 0.05 equiv.),  $(PPh_3)_2PdCl_2$  (21 mg, 0.03 mmol, 0.03 equiv.);  $CuBr_2$  (313 mg, 1.4 mmol, 1.4 equiv.) and amine **1m** (191 mg, 1.0 mmol, 1.0 equiv.). The purification was performed by column chromatography on silica gel to provide the desired compound **4i** (322 mg, 0.94 mmol, 94%).

White solid, mp 129- 130 °C.  $^1H$  NMR (500 MHz,  $CDCl_3$ ):  $\delta$  2.31 (s, 6H, 2xMe), 4.17 (d, 2H,  $^3J = 6.0$  Hz,  $CH_2$ ), 5.49 (s, 1H, NH), 7.16 (s, 1H,  $CH_{Ar}$ ), 7.31 (d, 2H,  $^3J = 7.9$  Hz,  $CH_{Ar}$ ), 7.42 (s, 2H,  $CH_{Ar}$ ), 7.48 (d, 2H,  $^3J = 7.7$  Hz,  $CH_{Ar}$ ).

$^{13}C\{^1H\}$  NMR (126 MHz,  $CDCl_3$ ):  $\delta$  21.1, 46.6, 123.9 (q,  $^1J_{CF} = 272.0$  Hz), 124.5, 125.3 (m), 128.0, 129.8 (q,  $^2J_{CF} = 32.2$  Hz), 134.4, 139.2, 139.3, 140.6. HRMS (TOF MS ES+) m/z:  $[M + H]^+$ : Calcd for  $C_{16}H_{17}NO_2SF_3$  (M+H) 344.0939. Found 344.0932.

### **3-chloro-N-(4-(trifluoromethoxy)benzyl)benzenesulfonamide 4j.**

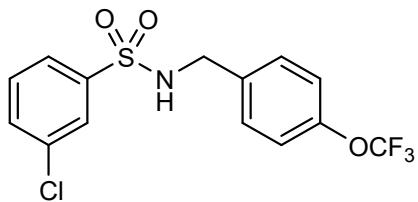

This compound was prepared starting from aryl bromide **2c** (190 mg, 1.0 mmol, 1.0 equiv.),  $K_2S_2O_5$  (267 mg, 1.2 mmol, 1.2 equiv.), cucurbit[6]uril (50 mg, 0.05 mmol, 0.05 equiv.),  $(PPh_3)_2PdCl_2$  (21 mg, 0.03 mmol, 0.03 equiv.) and amine **1n** (191 mg, 1.0 mmol, 1.0 equiv.). The purification was performed by column chromatography on silica gel to provide the desired compound **4j** (312 mg, 0.95 mmol, 95%).

Alternatively, the title compound was prepared starting from aromatic carboxylic acid **3b** (157 mg, 1.0 mmol, 1.0 equiv.),  $K_2S_2O_5$  (267 mg, 1.2 mmol, 1.2 equiv.), cucurbit[6]uril (50 mg, 0.05 mmol, 0.05 equiv.),  $(PPh_3)_2PdCl_2$  (21 mg, 0.03 mmol, 0.03 equiv.);  $CuBr_2$  (313 mg, 1.4 mmol, 1.4 equiv.) and amine **1n** (191 mg, 1.0 mmol, 1.0 equiv.). The purification was performed by column chromatography on silica gel to provide the desired compound **4j** (322 mg, 0.91 mmol, 91%).

Yellowish solid, mp 85 - 86 °C. **<sup>1</sup>H NMR** (500 MHz, CDCl<sub>3</sub>): δ 4.16 (d, 2H, <sup>3</sup>J = 6.3 Hz, NCH<sub>2</sub>), 5.34 (br. s, 1H, NH), 7.09 (d, 2H, <sup>3</sup>J = 8.1 Hz, CH<sub>Ar</sub>), 7.21 (d, 2H, <sup>3</sup>J = 8.6 Hz, CH<sub>Ar</sub>), 7.40 (t, 1H, <sup>3</sup>J = 8.1 Hz, CH<sub>Ar</sub>), 7.52 (dd, 1H, <sup>3</sup>J = 8.1 Hz, <sup>4</sup>J = 0.9 Hz, CH<sub>Ar</sub>), 7.68 (t, 1H, <sup>3</sup>J = 7.9 Hz, CH<sub>Ar</sub>), 7.79 (t, 1H, <sup>4</sup>J = 1.8 Hz, CH<sub>Ar</sub>).

**<sup>13</sup>C{<sup>1</sup>H} NMR** (126 MHz, CDCl<sub>3</sub>): δ 46.5, 120.3 (q, <sup>1</sup>J<sub>CF</sub> = 257.3 Hz), 121.1, 125.0, 127.2, 129.3, 130.4, 132.9, 134.6, 135.3, 141.6, 148.8.

MS (GC, 70eV): m/z (%) = 365 (M<sup>+</sup>, 1), 190 (100), 175 (13), 111 (17), 77 (17).

Anal. calcd. for C<sub>14</sub>H<sub>11</sub>NO<sub>3</sub>SClF<sub>3</sub>: C, 45.97; H, 3.03; N, 3.83. Found: C, 46.09; H, 3.14; N, 3.95.

#### **4-fluoro-N-(3-phenylpropyl)benzenesulfonamide 4k.**

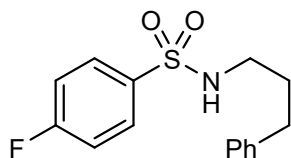

This compound was prepared starting from aryl bromide **2d** (174 mg, 1.0 mmol, 1.0 equiv.), K<sub>2</sub>S<sub>2</sub>O<sub>5</sub> (267 mg, 1.2 mmol, 1.2 equiv.), cucurbit[6]uril (50 mg, 0.05 mmol, 0.05 equiv.), (PPh<sub>3</sub>)<sub>2</sub>PdCl<sub>2</sub> (21 mg, 0.03 mmol, 0.03 equiv.) and amine **1l** (135 mg, 1.0 mmol, 1.0 equiv.). The purification was performed by column chromatography on silica gel to provide the desired compound **4k** (266 mg, 0.91 mmol, 91%).

White solid, mp 62 - 63 °C. **<sup>1</sup>H NMR** (500 MHz, CDCl<sub>3</sub>): δ 1.86 (quint, 2H, <sup>3</sup>J = 7.3 Hz, CH<sub>2</sub>), 2.67 (t, 2H, <sup>3</sup>J = 7.4 Hz, CH<sub>2</sub>), 3.02 (q, 2H, <sup>3</sup>J = 6.6 Hz, CH<sub>2</sub>), 5.14 (s, 1H, NH), 7.14 - 7.15 (m, 2H, CH<sub>Ar</sub>), 7.21 - 7.26 (m, 3H, CH<sub>Ar</sub>), 7.30 - 7.33 (m, 2H, CH<sub>Ar</sub>), 7.93 - 7.96 (m, 2H, CH<sub>Ar</sub>).

**<sup>13</sup>C{<sup>1</sup>H} NMR** (126 MHz, CDCl<sub>3</sub>): δ 31.0, 32.6, 42.5, 120.3 (d, J<sub>CF</sub> = 22.3 Hz), 126.1, 128.3 (d, J<sub>CF</sub> = 19.0 Hz), 129.7 (d, J<sub>CF</sub> = 9.4 Hz), 135.8, 140.7, 165.0 (d, <sup>1</sup>J<sub>CF</sub> = 254.4 Hz).

HRMS (TOF MS ES<sup>+</sup>) m/z: [M + H]<sup>+</sup>: Calcd for C<sub>15</sub>H<sub>17</sub>NO<sub>2</sub>SF 294.0968. Found 294.0964.

#### **4-fluoro-N,N-diisopropylbenzenesulfonamide 4l.**

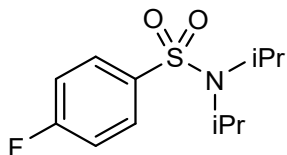

This compound was prepared starting from aryl bromide **2d** (174 mg, 1.0 mmol, 1.0 equiv.),  $K_2S_2O_5$  (267 mg, 1.2 mmol, 1.2 equiv.), cucurbit[6]uril (50 mg, 0.05 mmol, 0.05 equiv.),  $(PPh_3)_2PdCl_2$  (21 mg, 0.03 mmol, 0.03 equiv.) and amine **1q** (101 mg, 1.0 mmol, 1.0 equiv.). The purification was performed by column chromatography on silica gel to provide the desired compound **4l** (210 mg, 0.81 mmol, 81%).

Alternatively, the title compound was prepared starting from aromatic carboxylic acid **3c** (140 mg, 1.0 mmol, 1.0 equiv.),  $K_2S_2O_5$  (267 mg, 1.2 mmol, 1.2 equiv.), cucurbit[6]uril (50 mg, 0.05 mmol, 0.05 equiv.),  $(PPh_3)_2PdCl_2$  (21 mg, 0.03 mmol, 0.03 equiv.);  $CuBr_2$  (313 mg, 1.4 mmol, 1.4 equiv.) and amine **1q** (101 mg, 1.0 mmol, 1.0 equiv.). The purification was performed by column chromatography on silica gel to provide the desired compound **4l** (189 mg, 0.73 mmol, 73%).

White solid, mp 68 - 69 °C.  $^1H$  NMR (500 MHz,  $CDCl_3$ ):  $\delta$  1.23 (d, 12H,  $^3J = 7.1$  Hz, 4xMe), 3.64 – 3.70 (m, 2H, 2xCH), 7.11 – 7.14 (m, 2H,  $CH_{Ar}$ ), 7.84 – 7.86 (m, 2H,  $CH_{Ar}$ ).

$^{13}C\{^1H\}$  NMR (126 MHz,  $CDCl_3$ ):  $\delta$  21.8, 48.6, 115.8 (d,  $J_{CF} = 22.3$  Hz), 129.6 (d,  $J_{CF} = 9.0$  Hz), 137.2, 138.6, 164.6 (d,  $^1J_{CF} = 257.2$  Hz).

HRMS (TOF MS ES+Na) m/z:  $[M + H]^+$ : Calcd for  $C_{12}H_{18}NO_2SFNa$  282.0945. Found 282.0940.

#### **4-fluoro-N-isobutylbenzenesulfonamide 4m.**

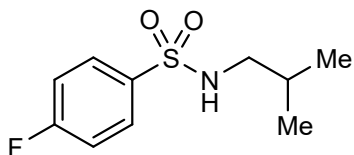

This compound was prepared starting from aryl bromide **2d** (174 mg, 1.0 mmol, 1.0 equiv.),  $K_2S_2O_5$  (267 mg, 1.2 mmol, 1.2 equiv.), cucurbit[6]uril (50 mg, 0.05 mmol, 0.05 equiv.),  $(PPh_3)_2PdCl_2$  (21 mg, 0.03 mmol, 0.03 equiv.) and amine **1h** (73 mg, 1.0 mmol, 1.0 equiv.). The purification was performed by column chromatography on silica gel to provide the desired compound **4m** (169 mg, 0.73 mmol, 73%).

Alternatively, the title compound was prepared starting from aromatic carboxylic acid **3c** (140 mg, 1.0 mmol, 1.0 equiv.),  $K_2S_2O_5$  (267 mg, 1.2 mmol, 1.2 equiv.), cucurbit[6]uril (50 mg, 0.05 mmol, 0.05 equiv.),  $(PPh_3)_2PdCl_2$  (21 mg, 0.03 mmol, 0.03 equiv.);  $CuBr_2$  (313 mg, 1.4 mmol, 1.4 equiv.) and amine **1h** (73 mg, 1.0 mmol, 1.0 equiv.). The purification was performed by column chromatography on silica gel to provide the desired compound **4m** (162 mg, 0.70 mmol, 70%).

White solid, mp 85 - 86 °C.  $^1H$  NMR (500 MHz,  $CDCl_3$ ):  $\delta$  0.83 (d, 6H,  $^3J = 6.7$  Hz, 2xMe), 1.67 – 1.70 (m, 1H, 2xCH), 2.72 (t, 2H,  $CH_2$ ), 5.18 (s, 1H, NH), 7.17 (t, 2H,  $^3J = 8.4$  Hz,  $CH_{Ar}$ ), 7.87 – 7.90 (m, 2H,  $CH_{Ar}$ ).

$^{13}C\{^1H\}$  NMR (126 MHz,  $CDCl_3$ ): 19.8, 28.3, 50.5, 116.2 (d,  $J_{CF} = 22.4$  Hz), 129.7 (d,  $J_{CF} = 9.5$  Hz), 136.0, 164.9 (d,  $^1J_{CF} = 256.0$  Hz).

HRMS (TOF MS ES+)  $m/z$ :  $[M + H]^+$ : Calcd for  $C_{10}H_{15}NO_2SF$  232.0809. Found 232.0808.

#### ***N,N*-dibenzyl-4-fluorobenzenesulfonamide 4n.**

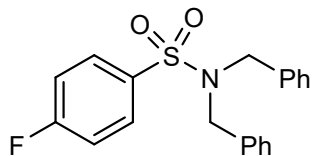

This compound was prepared starting from aryl bromide **2d** (174 mg, 1.0 mmol, 1.0 equiv.),  $K_2S_2O_5$  (267 mg, 1.2 mmol, 1.2 equiv.), cucurbit[6]uril (50 mg, 0.05 mmol, 0.05 equiv.),  $(PPh_3)_2PdCl_2$  (21 mg, 0.03 mmol, 0.03 equiv.) and amine **1t** (197 mg, 1.0 mmol, 1.0 equiv.). The purification was performed by column chromatography on silica gel to provide the desired compound **4n** (284 mg, 0.80 mmol, 80%).

Alternatively, the title compound was prepared starting from aromatic carboxylic acid **3c** (140 mg, 1.0 mmol, 1.0 equiv.),  $K_2S_2O_5$  (267 mg, 1.2 mmol, 1.2 equiv.), cucurbit[6]uril (50 mg, 0.05 mmol, 0.05 equiv.),  $(PPh_3)_2PdCl_2$  (21 mg, 0.03 mmol, 0.03 equiv.);  $CuBr_2$  (313 mg, 1.4 mmol, 1.4 equiv.) and amine **1t** (197 mg, 1.0 mmol, 1.0 equiv.). The purification was performed by column chromatography on silica gel to provide the desired compound **4n** (294 mg, 0.83 mmol, 83%).

White solid, mp 89 - 90 °C.  $^1H$  NMR (500 MHz,  $CDCl_3$ ):  $\delta$  4.36 (s, 4H, 2xNCH<sub>2</sub>), 7.08 – 7.10 (m, 4H,  $CH_{Ar}$ ), 7.17 (t, 2H,  $^3J = 8.5$  Hz,  $CH_{Ar}$ ), 7.25 – 7.26 (m, 6H,  $CH_{Ar}$ ), 7.83 – 7.86 (m, 2H,  $CH_{Ar}$ ).

$^{13}\text{C}\{^1\text{H}\}$  NMR (126 MHz,  $\text{CDCl}_3$ ):  $\delta$  50.4, 116.1 (d,  $J_{\text{CF}} = 21.1$  Hz), 127.7, 128.4 (m), 129.7 (d,  $J_{\text{CF}} = 9.0$  Hz), 135.3, 136.8 (m), 164.8 (d,  $^1J_{\text{CF}} = 254.4$  Hz).

MS (GC, 70eV):  $m/z$  (%) = 355 ( $\text{M}^+$ , 1), 264 (20), 196 (34), 91 (100).

Anal. calcd. for  $\text{C}_{20}\text{H}_{18}\text{NO}_2\text{FS}$ : C, 67.59; H, 5.10; N, 3.94. Found: C, 67.63; H, 5.22; N, 4.03.

***N*-(benzo[*d*][1,3]dioxol-5-ylmethyl)-2-fluorobenzenesulfonamide 4o.**

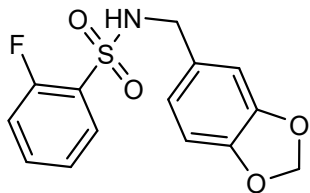

This compound was prepared starting from aryl bromide **2e** (174 mg, 1.0 mmol, 1.0 equiv.),  $\text{K}_2\text{S}_2\text{O}_5$  (267 mg, 1.2 mmol, 1.2 equiv.), cucurbit[6]uril (50 mg, 0.05 mmol, 0.05 equiv.),  $(\text{PPh}_3)_2\text{PdCl}_2$  (21 mg, 0.03 mmol, 0.03 equiv.) and amine **1p** (151 mg, 1.0 mmol, 1.0 equiv.). The purification was performed by column chromatography on silica gel to provide the desired compound **4o** (284 mg, 0.84 mmol, 84%).

Alternatively, the title compound was prepared starting from aromatic carboxylic acid **3d** (140 mg, 1.0 mmol, 1.0 equiv.),  $\text{K}_2\text{S}_2\text{O}_5$  (267 mg, 1.2 mmol, 1.2 equiv.), cucurbit[6]uril (50 mg, 0.05 mmol, 0.05 equiv.),  $(\text{PPh}_3)_2\text{PdCl}_2$  (21 mg, 0.03 mmol, 0.03 equiv.);  $\text{CuBr}_2$  (313 mg, 1.4 mmol, 1.4 equiv.) and amine **1p** (151 mg, 1.0 mmol, 1.0 equiv.). The purification was performed by column chromatography on silica gel to provide the desired compound **4o** (294 mg, 0.82 mmol, 82%).

White solid, mp 108 - 109 °C.  $^1\text{H}$  NMR (500 MHz,  $\text{CDCl}_3$ ):  $\delta$  4.07 (d, 2H,  $^3J = 6.3$  Hz,  $\text{NCH}_2$ ), 5.17 (br. s, 1H, NH), 5.89 (s, 1H,  $\text{OCH}_2\text{O}$ ), 6.21 – 6.66 (m, 3H,  $\text{CH}_{\text{Ar}}$ ), 7.13 – 7.19 (m, 1H,  $\text{CH}_{\text{Ar}}$ ), 7.24 (dt, 1H,  $^3J = 7.7$  Hz,  $^4J = 0.8$  Hz,  $\text{CH}_{\text{Ar}}$ ), 7.52 – 7.56 (m, 1H,  $\text{CH}_{\text{Ar}}$ ), 7.84 (dt, 1H,  $^3J = 7.5$  Hz,  $^4J = 1.7$  Hz,  $\text{CH}_{\text{Ar}}$ ).

$^{13}\text{C}\{^1\text{H}\}$  NMR (126 MHz,  $\text{CDCl}_3$ ):  $\delta$  47.2, 101.1, 108.2 (d,  $J_{\text{CF}} = 33.7$  Hz), 116.7 (d,  $J_{\text{CF}} = 19.6$  Hz), 121.4, 121.4 (d,  $J_{\text{CF}} = 3.7$  Hz), 128.0 (d,  $J_{\text{CF}} = 13.5$  Hz), 129.6, 134.8 (d,  $J_{\text{CF}} = 8.6$  Hz), 147.5 (d,  $J_{\text{CF}} = 69.5$  Hz), 158.6 (d,  $^1J_{\text{CF}} = 253.5$  Hz).

HRMS (TOF MS ES-)  $m/z$ :  $[\text{M} - \text{H}]^+$ : Calcd for  $\text{C}_{14}\text{H}_{11}\text{NO}_4\text{SF}$  308.0399. Found 308.0393.

***3,5*-difluoro-*N*-(3-phenylpropyl)benzenesulfonamide 4p.**



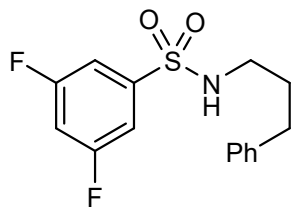

This compound was prepared starting from aryl bromide **2f** (192 mg, 1.0 mmol, 1.0 equiv.),  $K_2S_2O_5$  (267 mg, 1.2 mmol, 1.2 equiv.), cucurbit[6]uril (50 mg, 0.05 mmol, 0.05 equiv.),  $(PPh_3)_2PdCl_2$  (21 mg, 0.03 mmol, 0.03 equiv.) and amine **1l** (135 mg, 1.0 mmol, 1.0 equiv.). The purification was performed by column chromatography on silica gel to provide the desired compound **4p** (230 mg, 0.74 mmol, 74%).

Alternatively, the title compound was prepared starting from aromatic carboxylic acid **3e** (158 mg, 1.0 mmol, 1.0 equiv.),  $K_2S_2O_5$  (267 mg, 1.2 mmol, 1.2 equiv.), cucurbit[6]uril (50 mg, 0.05 mmol, 0.05 equiv.),  $(PPh_3)_2PdCl_2$  (21 mg, 0.03 mmol, 0.03 equiv.);  $CuBr_2$  (313 mg, 1.4 mmol, 1.4 equiv.) and amine **1l** (135 mg, 1.0 mmol, 1.0 equiv.). The purification was performed by column chromatography on silica gel to provide the desired compound **4p** (289 mg, 0.93 mmol, 93%).

White solid, mp 108 - 109 °C.  $^1H$  NMR (500 MHz,  $CDCl_3$ ):  $\delta$  1.91 (quint, 2H,  $^3J = 7.4$  Hz,  $CH_2$ ), 2.71 (t, 2H,  $^3J = 6.7$  Hz,  $CH_2$ ), 3.08 (q, 2H,  $^3J = 7.4$  Hz,  $CH_2$ ), 5.24 (br. s, 1H, NH), 7.08 – 7.12 (m, 1H,  $CH_{Ar}$ ), 7.18 (d, 2H,  $^3J = 6.9$  Hz,  $CH_{Ar}$ ), 7.26 – 7.29 (m, 1H,  $CH_{Ar}$ ), 7.33 – 7.36 (m, 2H,  $CH_{Ar}$ ), 7.47 – 7.49 (m, 2H,  $CH_{Ar}$ ).

$^{13}C\{^1H\}$  NMR (126 MHz,  $CDCl_3$ ):  $\delta$  31.0, 32.5, 42.7, 108.2 (d,  $J_{CF} = 26.2$  Hz), 110.4 (dd,  $J_{CF} = 21.3$  Hz,  $J_{CF} = 7.1$  Hz), 126.1, 128.3, 128.5, 140.5, 143.2 (d,  $J_{CF} = 8.1$  Hz), 162.8 (dd,  $^1J_{CF} = 255.7$  Hz,  $J_{CF} = 11.9$  Hz).

HRMS (TOF MS ES+) m/z:  $[M + H]^+$ : Calcd for  $C_{15}H_{16}NO_2SF_2$  312.0868. Found 312.0870.

#### ***N-cyclohexyl-3,5-difluoro-N-methylbenzenesulfonamide 4q.***

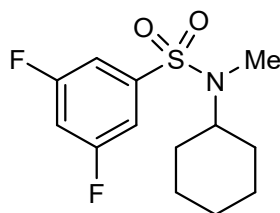

This compound was prepared starting from aryl bromide **2f** (192 mg, 1.0 mmol, 1.0 equiv.),  $K_2S_2O_5$  (267 mg, 1.2 mmol, 1.2 equiv.), cucurbit[6]uril (50 mg, 0.05 mmol, 0.05 equiv.),  $(PPh_3)_2PdCl_2$  (21 mg, 0.03 mmol, 0.03 equiv.) and amine **1r** (113 mg, 1.0 mmol, 1.0 equiv.). The purification was performed by column chromatography on silica gel to provide the desired compound **4q** (234 mg, 0.81 mmol, 81%).

Alternatively, the title compound was prepared starting from aromatic carboxylic acid **3e** (158 mg, 1.0 mmol, 1.0 equiv.),  $K_2S_2O_5$  (267 mg, 1.2 mmol, 1.2 equiv.), cucurbit[6]uril (50 mg, 0.05 mmol, 0.05 equiv.),  $(PPh_3)_2PdCl_2$  (21 mg, 0.03 mmol, 0.03 equiv.);  $CuBr_2$  (313 mg, 1.4 mmol, 1.4 equiv.) and amine **1r** (113 mg, 1.0 mmol, 1.0 equiv.). The purification was performed by column chromatography on silica gel to provide the desired compound **4q** (257 mg, 0.89 mmol, 89%).

White solid, mp 77 - 78 °C.  $^1H$  NMR (500 MHz,  $CDCl_3$ ):  $\delta$  0.96 – 1.00 (m, 1H, Cycl.), 1.25 – 1.35 (m, 4H, Cycl.), 1.46 – 1.48 (m, 2H, Cycl.), 1.56 – 1.59 (m, 1H, Cycl.), 1.71 – 1.73 (m, 2H, Cycl.), 2.75 (s, 3H, Me), 3.70 – 3.73 (m, 1H, Cycl.), 6.98 (tt, 1H,  $^3J = 8.3$  Hz,  $^4J = 2.3$  Hz,  $CH_{Ar}$ ), 7.30 – 7.31 (m, 2H,  $CH_{Ar}$ ).

$^{13}C\{^1H\}$  NMR (126 MHz,  $CDCl_3$ ):  $\delta$  25.1, 25.6, 28.6, 30.2, 57.1, 107.7 (t,  $J_{CF} = 25.1$  Hz), 110.1 (dd,  $J_{CF} = 20.7$  Hz,  $J_{CF} = 7.6$  Hz), 143.7 (m), 162.7 (dd,  $^1J_{CF} = 254.7$  Hz,  $J_{CF} = 12.0$  Hz).

MS (GC, 70eV):  $m/z$  (%) = 289 ( $M^+$ , 22), 246 (100), 177 (77), 113 (30).

Anal. calcd. for  $C_{13}H_{17}NO_2F_2S$ : C, 53.97; H, 5.92; N, 4.84. Found: C, 54.08; H, 5.76; N, 4.96.

#### ***N*-(adamantan-1-yl)-3,4-difluorobenzenesulfonamide 4r.**

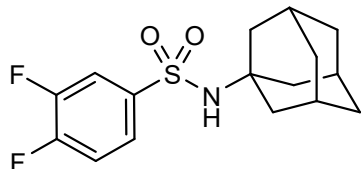

This compound was prepared starting from aryl bromide **2f** (192 mg, 1.0 mmol, 1.0 equiv.),  $K_2S_2O_5$  (267 mg, 1.2 mmol, 1.2 equiv.), cucurbit[6]uril (50 mg, 0.05 mmol, 0.05 equiv.),  $(PPh_3)_2PdCl_2$  (21 mg, 0.03 mmol, 0.03 equiv.) and amine **1j** (151 mg, 1.0 mmol, 1.0 equiv.). The purification was performed by column chromatography on silica gel to provide the desired compound **4r** (235 mg, 0.72 mmol, 72%).

Alternatively, the title compound was prepared starting from aromatic carboxylic acid **3e** (158 mg, 1.0 mmol, 1.0 equiv.), K<sub>2</sub>S<sub>2</sub>O<sub>5</sub> (267 mg, 1.2 mmol, 1.2 equiv.), cucurbit[6]uril (50 mg, 0.05 mmol, 0.05 equiv.), (PPh<sub>3</sub>)<sub>2</sub>PdCl<sub>2</sub> (21 mg, 0.03 mmol, 0.03 equiv.); CuBr<sub>2</sub> (313 mg, 1.4 mmol, 1.4 equiv.) and amine **1j** (151 mg, 1.0 mmol, 1.0 equiv.). The purification was performed by column chromatography on silica gel to provide the desired compound **4r** (229 mg, 0.70 mmol, 70%).

Alternatively, the title compound was prepared starting from aryl bromide **2f** (192 mg, 1.0 mmol, 1.0 equiv.), DABSO (264 mg, 1.1 mmol, 1.1 equiv.), cucurbit[6]uril (50 mg, 0.05 mmol, 0.05 equiv.), (PPh<sub>3</sub>)<sub>2</sub>PdCl<sub>2</sub> (21 mg, 0.03 mmol, 0.03 equiv.) and amine **1j** (151 mg, 1.0 mmol, 1.0 equiv.). The purification was performed by column chromatography on silica gel to provide the desired compound **4r** (229 mg, 0.70 mmol, 70%).

Alternatively, the title compound was prepared starting from aromatic carboxylic acid **3e** (158 mg, 1.0 mmol, 1.0 equiv.), DABSO (264 mg, 1.1 mmol, 1.1 equiv.), cucurbit[6]uril (50 mg, 0.05 mmol, 0.05 equiv.), (PPh<sub>3</sub>)<sub>2</sub>PdCl<sub>2</sub> (21 mg, 0.03 mmol, 0.03 equiv.); CuBr<sub>2</sub> (313 mg, 1.4 mmol, 1.4 equiv.) and amine **1j** (151 mg, 1.0 mmol, 1.0 equiv.). The purification was performed by column chromatography on silica gel to provide the desired compound **4r** (219 mg, 0.67 mmol, 67%).

Alternatively, the title compound was prepared starting from aryl bromide **2f** (192 mg, 1.0 mmol, 1.0 equiv.), K<sub>2</sub>S<sub>2</sub>O<sub>5</sub> (1.068 g, 4.8 mmol, 4.8 equiv.), cucurbit[6]uril (50 mg, 0.05 mmol, 0.05 equiv.), (PPh<sub>3</sub>)<sub>2</sub>PdCl<sub>2</sub> (21 mg, 0.03 mmol, 0.03 equiv.) and nitro compound **5c** (181 mg, 1.0 mmol, 1.0 equiv.). The purification was performed by column chromatography on silica gel to provide the desired compound **4r** (199 mg, 0.61 mmol, 61%).

Alternatively, the title compound was prepared starting from aromatic carboxylic acid **3e** (158 mg, 1.0 equiv.), K<sub>2</sub>S<sub>2</sub>O<sub>5</sub> (1.068 g, 4.8 mmol, 4.8 equiv.), cucurbit[6]uril (50 mg, 0.05 mmol, 0.05 equiv.), (PPh<sub>3</sub>)<sub>2</sub>PdCl<sub>2</sub> (21 mg, 0.03 mmol, 0.03 equiv.); CuBr<sub>2</sub> (313 mg, 1.4 mmol, 1.4 equiv.) and nitro compound **5b** (207 mg, (1.0 mmol, 1.0 equiv.). The purification was performed by column chromatography on silica gel to provide the desired compound **4r** (190 mg, 0.58 mmol, 58%).

White solid, mp 144 - 145 °C. <sup>1</sup>H NMR (500 MHz, CDCl<sub>3</sub>): δ 1.57 (q, 6H, <sup>3</sup>J = 13.6 Hz, Adamantyl), 1.78 (s, 6H, Adamantyl), 2.01 (s, 3H, Adamantyl), 5.16 (s, 1H, NH), 7.28 (q, 1H, <sup>3</sup>J = 8.4 Hz, CH<sub>Ar</sub>), 7.70 – 7.77 (m, 2H, CH<sub>Ar</sub>).

$^{13}\text{C}\{^1\text{H}\}$  NMR (126 MHz,  $\text{CDCl}_3$ ):  $\delta$  29.4, 35.7, 42.9, 55.5, 116.8 (d,  $J_{\text{CF}} = 18.6$  Hz), 118.0 (d,  $J_{\text{CF}} = 17.9$  Hz), 123.8 (m), 140.9 (m), 149.8 (dd,  $^1J_{\text{CF}} = 254.4$  Hz,  $J_{\text{CF}} = 14.0$  Hz), 152.6 (dd,  $^1J_{\text{CF}} = 255.8$  Hz,  $J_{\text{CF}} = 12.6$  Hz).

MS (GC, 70eV):  $m/z$  (%) = 327 ( $\text{M}^+$ , 37), 270 (45), 135 (19), 113 (43), 93 (100).

Anal. calcd. for  $\text{C}_{16}\text{H}_{19}\text{NO}_2\text{F}_2\text{S}$ : C, 58.70; H, 5.85; N, 4.28. Found: C, 58.72; H, 5.93; N, 4.11.

#### *N-isopropyl-4-(trifluoromethyl)benzenesulfonamide 4s.*

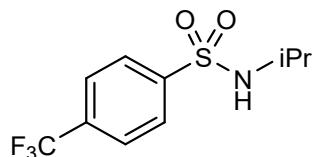

This compound was prepared starting from aryl bromide **2h** (224 mg, 1.0 mmol, 1.0 equiv.),  $\text{K}_2\text{S}_2\text{O}_5$  (267 mg, 1.2 mmol, 1.2 equiv.), cucurbit[6]uril (50 mg, 0.05 mmol, 0.05 equiv.),  $(\text{PPh}_3)_2\text{PdCl}_2$  (21 mg, 0.03 mmol, 0.03 equiv.) and amine **1g** (59 mg, 1.0 mmol, 1.0 equiv.). The purification was performed by column chromatography on silica gel to provide the desired compound **4s** (238 mg, 0.89 mmol, 89%).

Alternatively, the title compound was prepared starting from aromatic carboxylic acid **3g** (190 mg, 1.0 mmol, 1.0 equiv.),  $\text{K}_2\text{S}_2\text{O}_5$  (267 mg, 1.2 mmol, 1.2 equiv.), cucurbit[6]uril (50 mg, 0.05 mmol, 0.05 equiv.),  $(\text{PPh}_3)_2\text{PdCl}_2$  (21 mg, 0.03 mmol, 0.03 equiv.);  $\text{CuBr}_2$  (313 mg, 1.4 mmol, 1.4 equiv.) and amine **1g** (59 mg, 1.0 mmol, 1.0 equiv.). The purification was performed by column chromatography on silica gel to provide the desired compound **4s** (214 mg, 0.80 mmol, 80%).

White solid, mp 77 - 78 °C.  $^1\text{H}$  NMR (500 MHz,  $\text{CDCl}_3$ ):  $\delta$  1.05 (d, 6H,  $^3J = 6.8$  Hz, 2xMe), 3.45 – 3.47 (m, 1H, CH.), 5.03 (s, 1H, NH), 7.73 (d, 2H,  $^3J = 8.2$  Hz,  $\text{CH}_{\text{Ar}}$ ), 8.0 (d, 2H,  $^3J = 8.2$  Hz,  $\text{CH}_{\text{Ar}}$ ).

$^{13}\text{C}\{^1\text{H}\}$  NMR (126 MHz,  $\text{CDCl}_3$ ):  $\delta$  23.6, 46.4, 123.3 (q,  $^1J_{\text{CF}} = 278.8$  Hz), 126.2, 127.4, 134.1 (q,  $^2J_{\text{CF}} = 33.1$  Hz), 144.8.

HRMS (TOF MS ES+)  $m/z$ :  $[\text{M} + \text{H}]^+$ : Calcd for  $\text{C}_{10}\text{H}_{13}\text{NO}_2\text{SF}_3$  268.0612. Found 268.0619.

#### *N,N-diisopropyl-4-(trifluoromethyl)benzenesulfonamide 4t.*

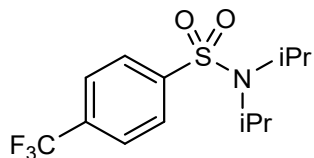

This compound was prepared starting from aryl bromide **2h** (224 mg, 1.0 mmol, 1.0 equiv.),  $K_2S_2O_5$  (267 mg, 1.2 mmol, 1.2 equiv.), cucurbit[6]uril (50 mg, 0.05 mmol, 0.05 equiv.),  $(PPh_3)_2PdCl_2$  (21 mg, 0.03 mmol, 0.03 equiv.) and amine **1q** (101 mg, 1.0 mmol, 1.0 equiv.). The purification was performed by column chromatography on silica gel to provide the desired compound **4t** (222 mg, 0.72 mmol, 72%).

Alternatively, the title compound was prepared starting from aromatic carboxylic acid **3g** (190 mg, 1.0 mmol, 1.0 equiv.),  $K_2S_2O_5$  (267 mg, 1.2 mmol, 1.2 equiv.), cucurbit[6]uril (50 mg, 0.05 mmol, 0.05 equiv.),  $(PPh_3)_2PdCl_2$  (21 mg, 0.03 mmol, 0.03 equiv.);  $CuBr_2$  (313 mg, 1.4 mmol, 1.4 equiv.) and amine **1q** (101 mg, 1.0 mmol, 1.0 equiv.). The purification was performed by column chromatography on silica gel to provide the desired compound **4t** (185 mg, 0.60 mmol, 60%).

White solid, mp 100 - 101 °C.  $^1H$  NMR (500 MHz,  $CDCl_3$ ):  $\delta$  1.25 (d, 12H,  $^3J = 6.9$  Hz, 4xMe), 3.72 – 3.75 (m, 2H, 2xCH.), 7.73 (d, 2H,  $^3J = 8.3$  Hz,  $CH_{Ar}$ ), 7.98 (d, 2H,  $^3J = 8.0$  Hz,  $CH_{Ar}$ ).

$^{13}C\{^1H\}$  NMR (126 MHz,  $CDCl_3$ ):  $\delta$  21.9, 49.0, 123.3 (q,  $^1J_{CF} = 274.2$  Hz), 126.0 (m), 127.6, 133.5 (q,  $^2J_{CF} = 32.7$  Hz), 146.2.

HRMS (TOF MS ES+Na) m/z:  $[M + Na]^+$ : Calcd for  $C_{13}H_{18}NO_2SNaF_3$  332.0930. Found 332.0908.

#### ***N*-benzyl-4-(trifluoromethyl)benzenesulfonamide 4u.**

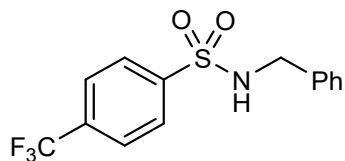

This compound was prepared starting from aryl bromide **2h** (224 mg, 1.0 mmol, 1.0 equiv.),  $K_2S_2O_5$  (267 mg, 1.2 mmol, 1.2 equiv.), cucurbit[6]uril (50 mg, 0.05 mmol, 0.05 equiv.),  $(PPh_3)_2PdCl_2$  (21 mg, 0.03 mmol, 0.03 equiv.) and amine **1k** (107 mg, 1.0 mmol, 1.0 equiv.). The purification was performed by column chromatography on silica gel to provide the desired compound **4u** (249 mg, 0.79 mmol, 79%).

Alternatively, the title compound was prepared starting from aromatic carboxylic acid **3g** (190 mg, 1.0 mmol, 1.0 equiv.), K<sub>2</sub>S<sub>2</sub>O<sub>5</sub> (267 mg, 1.2 mmol, 1.2 equiv.), cucurbit[6]uril (50 mg, 0.05 mmol, 0.05 equiv.), (PPh<sub>3</sub>)<sub>2</sub>PdCl<sub>2</sub> (21 mg, 0.03 mmol, 0.03 equiv.); CuBr<sub>2</sub> (313 mg, 1.4 mmol, 1.4 equiv.) and amine **1k** (107 mg, 1.0 mmol, 1.0 equiv.). The purification was performed by column chromatography on silica gel to provide the desired compound **4u** (277 mg, 0.88 mmol, 88%).

Alternatively, the title compound was prepared starting from aryl bromide **2h** (224 mg, 1.0 mmol, 1.0 equiv.), K<sub>2</sub>S<sub>2</sub>O<sub>5</sub> (1.068 g, 4.8 mmol, 4.8 equiv.), cucurbit[6]uril (50 mg, 0.05 mmol, 0.05 equiv.), (PPh<sub>3</sub>)<sub>2</sub>PdCl<sub>2</sub> (21 mg, 0.03 mmol, 0.03 equiv.) and nitro compound **5d** (137 mg, 1.0 mmol, 1.0 equiv.). The purification was performed by column chromatography on silica gel to provide the desired compound **4u** (202 mg, 0.64 mmol, 64%).

Alternatively, the title compound was prepared starting from aromatic carboxylic acid **3g** (190 mg, 1.0 equiv.), K<sub>2</sub>S<sub>2</sub>O<sub>5</sub> (1.068 g, 4.8 mmol, 4.8 equiv.), cucurbit[6]uril (50 mg, 0.05 mmol, 0.05 equiv.), (PPh<sub>3</sub>)<sub>2</sub>PdCl<sub>2</sub> (21 mg, 0.03 mmol, 0.03 equiv.); CuBr<sub>2</sub> (313 mg, 1.4 mmol, 1.4 equiv.) and nitro compound **5d** (137 mg, 1.0 mmol, 1.0 equiv.). The purification was performed by column chromatography on silica gel to provide the desired compound **4u** (208 mg, 0.66 mmol, 66%).

White solid, mp 121 - 122 °C. <sup>1</sup>H NMR (500 MHz, CDCl<sub>3</sub>): δ 4.16 (d, 2H, <sup>3</sup>J = 6.2 Hz, CH<sub>2</sub>), 5.35 (s, 1H, NH), 7.14 – 7.16 (m, 2H, CH<sub>Ar</sub>), 7.22 – 7.26 (m, 3H, CH<sub>Ar</sub>), 7.70 (d, 2H, <sup>3</sup>J = 8.2 Hz, CH<sub>Ar</sub>), 7.92 (d, 2H, <sup>3</sup>J = 8.2 Hz, CH<sub>Ar</sub>).

<sup>13</sup>C{<sup>1</sup>H} NMR (126 MHz, CDCl<sub>3</sub>): δ 47.2, 123.1 (q, <sup>1</sup>J<sub>CF</sub> = 268.2 Hz), 126.1 (m), 127.5, 127.8, 128.0, 128.7, 134.2 (q, <sup>2</sup>J<sub>CF</sub> = 35.0 Hz), 135.7.

HRMS (TOF MS ES-) m/z: [M - H]<sup>+</sup>: Calcd for C<sub>14</sub>H<sub>11</sub>NO<sub>2</sub>SF<sub>3</sub> 314.0467. Found 314.0463.

***N-isobutyl-4-(trifluoromethoxy)benzenesulfonamide 4v.***

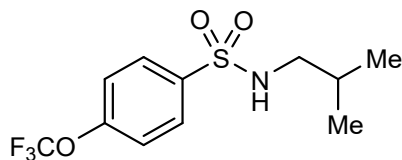

This compound was prepared starting from aryl bromide **2i** (240 mg, 1.0 mmol, 1.0 equiv.),  $K_2S_2O_5$  (267 mg, 1.2 mmol, 1.2 equiv.), cucurbit[6]uril (50 mg, 0.05 mmol, 0.05 equiv.),  $(PPh_3)_2PdCl_2$  (21 mg, 0.03 mmol, 0.03 equiv.) and amine **1h** (73 mg, 1.0 mmol, 1.0 equiv.). The purification was performed by column chromatography on silica gel to provide the desired compound **4v** (211 mg, 0.71 mmol, 71%).

Alternatively, the title compound was prepared starting from aromatic carboxylic acid **3h** (206 mg, 1.0 mmol, 1.0 equiv.),  $K_2S_2O_5$  (267 mg, 1.2 mmol, 1.2 equiv.), cucurbit[6]uril (50 mg, 0.05 mmol, 0.05 equiv.),  $(PPh_3)_2PdCl_2$  (21 mg, 0.03 mmol, 0.03 equiv.);  $CuBr_2$  (313 mg, 1.4 mmol, 1.4 equiv.) and amine **1h** (73 mg, 1.0 mmol, 1.0 equiv.). The purification was performed by column chromatography on silica gel to provide the desired compound **4v** (175 mg, 0.59 mmol, 59%).

White solid, mp 120 - 122 °C.  $^1H$  NMR (500 MHz,  $CDCl_3$ ):  $\delta$  0.86 (d, 6H,  $^3J = 6.8$  Hz, 2xMe), 1.69 – 1.74 (m, 1H, CH), 2.76 (t, 2H,  $^3J = 6.4$  Hz,  $CH_2$ ), 5.12 (s, 1H, NH), 7.32 (d, 1H,  $^3J = 8.8$  Hz,  $CH_{Ar}$ ), 7.92 (d, 1H,  $^3J = 8.8$  Hz,  $CH_{Ar}$ ).

$^{13}C\{^1H\}$  NMR (126 MHz,  $CDCl_3$ ):  $\delta$  19.8, 28.4, 50.5, 120.2 (q,  $^1J_{CF} = 259.2$  Hz), 121.0, 129.1, 138.4, 152.0.

HRMS (TOF MS ES+) m/z:  $[M + H]^+$ : Calcd for  $C_{11}H_{15}NO_3SF_3$  298.0725. Found 298.0725.

#### ***N,N-dibenzyl-1-methyl-1H-imidazole-4-sulfonamide 4w.***

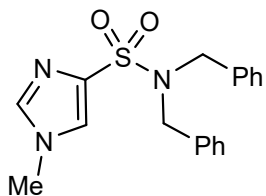

This compound was prepared starting from aryl bromide **2l** (160 mg, 1.0 mmol, 1.0 equiv.),  $K_2S_2O_5$  (267 mg, 1.2 mmol, 1.2 equiv.), cucurbit[6]uril (50 mg, 0.05 mmol, 0.05 equiv.),  $(PPh_3)_2PdCl_2$  (21 mg, 0.03 mmol, 0.03 equiv.) and amine **1t** (197 mg, 1.0 mmol, 1.0 equiv.). The purification was performed by column chromatography on silica gel to provide the desired compound **4w** (252 mg, 0.74 mmol, 74%).

Alternatively, the title compound was prepared starting from aromatic carboxylic acid **3k** (126 mg, 1.0 mmol, 1.0 equiv.),  $K_2S_2O_5$  (267 mg, 1.2 mmol, 1.2 equiv.), cucurbit[6]uril (50 mg, 0.05 mmol, 0.05 equiv.),  $(PPh_3)_2PdCl_2$  (21 mg, 0.03 mmol, 0.03 equiv.);  $CuBr_2$  (313 mg, 1.4 mmol, 1.4 equiv.) and amine **1t** (197 mg, 1.0 mmol, 1.0 equiv.). The purification was performed by column chromatography on silica gel to provide the desired compound **4w** (280 mg, 0.82 mmol, 82%).

White solid, mp 120 - 122 °C.  $^1\text{H NMR}$  (500 MHz,  $\text{CDCl}_3$ ):  $\delta$  3.71 (s, 3H, Me), 4.30 (s, 4H,  $2\times\text{CH}_2$ ), 7.13 – 7.15 (m, 4H,  $\text{CH}_{\text{Ar}}$ ), 7.19 – 7.23 (m, 6H,  $\text{CH}_{\text{Ar}}$ ), 7.86 (s, 1H, Imidazole), 7.86 (s, 1H, Imidazole).

$^{13}\text{C}\{^1\text{H}\}$  NMR (126 MHz,  $\text{CDCl}_3$ ):  $\delta$  33.5, 51.4, 125.2, 127.2, 128.1, 128.2, 136.5, 138.5, 139.9.

MS (GC, 70eV):  $m/z$  (%) = 341 ( $\text{M}^+$ , 9), 145 (33), 95 (100).

Anal. calcd. for  $\text{C}_{18}\text{H}_{19}\text{N}_3\text{O}_2\text{S}$ : C, 63.32; H, 5.61; N, 12.31. Found: C, 63.33; H, 5.693; N, 12.21.

***N-cyclohexyl-1-methyl-1H-imidazole-4-sulfonamide 4x.***

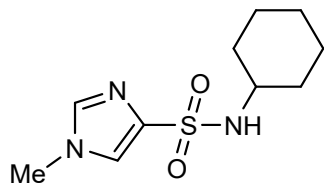

This compound was prepared starting from aryl bromide **2i** (160 mg, 1.0 mmol, 1.0 equiv.),  $\text{K}_2\text{S}_2\text{O}_5$  (267 mg, 1.2 mmol, 1.2 equiv.), cucurbit[6]uril (50 mg, 0.05 mmol, 0.05 equiv.),  $(\text{PPh}_3)_2\text{PdCl}_2$  (21 mg, 0.03 mmol, 0.03 equiv.) and amine **1i** (99 mg, 1.0 mmol, 1.0 equiv.). The purification was performed by column chromatography on silica gel to provide the desired compound **4x** (170 mg, 0.70 mmol, 70%).

Alternatively, the title compound was prepared starting from aromatic carboxylic acid **3k** (126 mg, 1.0 mmol, 1.0 equiv.),  $\text{K}_2\text{S}_2\text{O}_5$  (267 mg, 1.2 mmol, 1.2 equiv.), cucurbit[6]uril (50 mg, 0.05 mmol, 0.05 equiv.),  $(\text{PPh}_3)_2\text{PdCl}_2$  (21 mg, 0.03 mmol, 0.03 equiv.);  $\text{CuBr}_2$  (313 mg, 1.4 mmol, 1.4 equiv.) and amine **1i** (99 mg, 1.0 mmol, 1.0 equiv.). The purification was performed by column chromatography on silica gel to provide the desired compound **4x** (209 mg, 0.86 mmol, 86%).

Alternatively, the title compound was prepared starting from aryl bromide **2i** (160 mg, 1.0 mmol, 1.0 equiv.),  $\text{K}_2\text{S}_2\text{O}_5$  (1.068 g, 4.8 mmol, 4.8 equiv.), cucurbit[6]uril (50 mg, 0.05 mmol, 0.05 equiv.),  $(\text{PPh}_3)_2\text{PdCl}_2$  (21 mg, 0.03 mmol, 0.03 equiv.) and nitro compound **5e** (99 mg, 1.0 mmol, 1.0 equiv.). The purification was performed by column chromatography on silica gel to provide the desired compound **4x** (148 mg, 0.55 mmol, 55%).

Alternatively, the title compound was prepared starting from aromatic carboxylic acid **3g** (190 mg, 1.0 equiv.),  $\text{K}_2\text{S}_2\text{O}_5$  (1.068 g, 4.8 mmol, 4.8 equiv.), cucurbit[6]uril (50 mg, 0.05 mmol, 0.05 equiv.),  $(\text{PPh}_3)_2\text{PdCl}_2$  (21 mg, 0.03 mmol, 0.03 equiv.);  $\text{CuBr}_2$  (313 mg, 1.4 mmol, 1.4 equiv.) and



nitro compound **5e** (99 mg, (1.0 mmol, 1.0 equiv.). The purification was performed by column chromatography on silica gel to provide the desired compound **4x** (139 mg, 0.57 mmol, 57%).

White solid, mp 177-178 °C. <sup>1</sup>H NMR (500 MHz, DMSO-*d*<sub>6</sub>): δ 1.00 – 1.17 (m, 5H, Cycl.), 1.43 – 1.45 (m, 1H, Cycl.), 1.58 – 1.66 (m, 4H, Cycl.), 2.96 – 2.97 (m, 1H, Cycl.), 3.68 (s, 3H, Me), 7.36 (d, 1H, <sup>3</sup>J = 7.3 Hz, NH), 7.65 (d, 1H, <sup>4</sup>J = 1.1 Hz, Imidazole), 7.73 (d, 1H, <sup>4</sup>J = 0.7 Hz, Imidazole).

<sup>13</sup>C{<sup>1</sup>H} NMR (126 MHz, DMSO-*d*<sub>6</sub>): δ 24.6, 25.0, 33.40, 33.44, 52.1, 123.6, 139.4, 141.0.

MS (GC, 70eV): m/z (%) = 243(M<sup>+</sup>, 1), 200 (31), 145 (65), 136 (21), 123 (21), 98 (100), 82 (74).

Anal. calcd. for C<sub>10</sub>H<sub>17</sub>N<sub>3</sub>O<sub>2</sub>S: C, 49.36; H, 7.04; N, 17.27. Found: C, 49.45; H, 7.11; N, 17.21.

#### **1-methyl-N-(4-(trifluoromethoxy)benzyl)-1H-imidazole-4-sulfonamide 4y.**

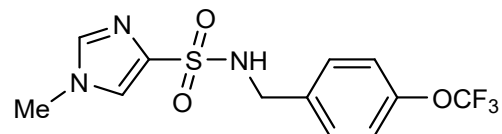

This compound was prepared starting from aryl bromide **2i** (160 mg, 1.0 mmol, 1.0 equiv.), K<sub>2</sub>S<sub>2</sub>O<sub>5</sub> (267 mg, 1.2 mmol, 1.2 equiv.), cucurbit[6]uril (50 mg, 0.05 mmol, 0.05 equiv.), (PPh<sub>3</sub>)<sub>2</sub>PdCl<sub>2</sub> (21 mg, 0.03 mmol, 0.03 equiv.) and amine **1n** (191 mg, 1.0 mmol, 1.0 equiv.). The purification was performed by column chromatography on silica gel to provide the desired compound **4y** (228 mg, 0.68 mmol, 68%).

Alternatively, the title compound was prepared starting from aromatic carboxylic acid **3k** (126 mg, 1.0 mmol, 1.0 equiv.), K<sub>2</sub>S<sub>2</sub>O<sub>5</sub> (267 mg, 1.2 mmol, 1.2 equiv.), cucurbit[6]uril (50 mg, 0.05 mmol, 0.05 equiv.), (PPh<sub>3</sub>)<sub>2</sub>PdCl<sub>2</sub> (21 mg, 0.03 mmol, 0.03 equiv.); CuBr<sub>2</sub> (313 mg, 1.4 mmol, 1.4 equiv.) and amine **1n** (191 mg, 1.0 mmol, 1.0 equiv.). The purification was performed by column chromatography on silica gel to provide the desired compound **4y** (261 mg, 0.78 mmol, 78%).

White solid, mp 170 - 171 °C. <sup>1</sup>H NMR (500 MHz, DMSO-*d*<sub>6</sub>): δ 3.60 (s, 3H, Me), 4.07 (s, 2H, CH<sub>2</sub>), 7.27 (d, 2H, <sup>3</sup>J = 8.0 Hz, CH<sub>Ar</sub>), 7.39 (d, 2H, <sup>3</sup>J = 8.7 Hz, CH<sub>Ar</sub>), 7.71 (d, 1H, <sup>4</sup>J = 1.1 Hz, Imidazole), 7.62 (d, 1H, <sup>4</sup>J = 1.0 Hz, Imidazole), 8.00 (br. s, 1H, NH).

<sup>13</sup>C{<sup>1</sup>H} NMR (126 MHz, DMSO-*d*<sub>6</sub>): δ 33.4, 45.3, 120.1 (q, <sup>1</sup>J<sub>CF</sub> = 259.9 Hz), 120.8, 124.2, 129.4, 137.9, 139.6, 139.7, 147.3.

HRMS (TOF MS ES+) m/z: [M + H]<sup>+</sup>: Calcd for C<sub>12</sub>H<sub>13</sub>N<sub>3</sub>O<sub>3</sub>SF<sub>3</sub> 336.0631. Found 336.0630.

***N-cyclohexyl-1-methyl-N-phenyl-1H-imidazole-4-sulfonamide 4z.***

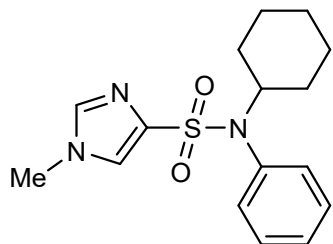

This compound was prepared starting from aryl bromide **2i** (160 mg, 1.0 mmol, 1.0 equiv.),  $K_2S_2O_5$  (267 mg, 1.2 mmol, 1.2 equiv.), cucurbit[6]uril (50 mg, 0.05 mmol, 0.05 equiv.),  $(PPh_3)_2PdCl_2$  (21 mg, 0.03 mmol, 0.03 equiv.) and amine **1s** (175 mg, 1.0 mmol, 1.0 equiv.). The purification was performed by column chromatography on silica gel to provide the desired compound **4z** (230 mg, 0.72 mmol, 72%).

Alternatively, the title compound was prepared starting from aromatic carboxylic acid **3k** (126 mg, 1.0 mmol, 1.0 equiv.),  $K_2S_2O_5$  (267 mg, 1.2 mmol, 1.2 equiv.), cucurbit[6]uril (50 mg, 0.05 mmol, 0.05 equiv.),  $(PPh_3)_2PdCl_2$  (21 mg, 0.03 mmol, 0.03 equiv.);  $CuBr_2$  (313 mg, 1.4 mmol, 1.4 equiv.) and amine **1s** (175 mg, 1.0 mmol, 1.0 equiv.). The purification was performed by column chromatography on silica gel to provide the desired compound **4z** (191 mg, 0.60 mmol, 60%).

White solid, mp 194 - 195 °C.  $^1H$  NMR (500 MHz,  $CDCl_3$ ):  $\delta$  0.78 – 0.83 (m, 1H, Cy), 1.00 – 1.04 (m, 2H, Cy), 1.29 – 1.31 (m, 2H, Cy), 1.48 (br. s, 1H, Cy), 1.67 (br. s, 2H, Cy), 1.98 (br. s, 2H, Cy), 3.61 (s, 3H, Me), 4.08 – 4.13 (m, 1H, Cy), 7.13 – 7.28 (m, 6H,  $CH_{Ar}$ ), 7.44 – 7.45 (m, 1H,  $CH_{Ar}$ ).

$^{13}C\{^1H\}$  NMR (126 MHz,  $CDCl_3$ ):  $\delta$  25.0, 25.8, 32.7, 33.8, 59.1, 124.3, 128.2, 128.5, 132.3, 135.8, 138.8, 141.0.

HRMS (TOF MS ES+) m/z:  $[M + H]^+$ : Calcd for  $C_{15}H_{22}N_5OS$  320.1576. Found 320.1545.

***N,N-dibenzyl-4-(trifluoromethyl)benzenesulfonamide 4aa.***

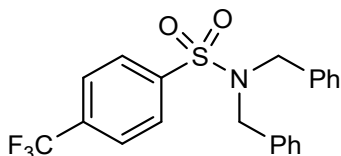

This compound was prepared starting from  $\text{CF}_3\text{Ph-Pd}(\text{PPh}_3)_2\text{-Br}$  (428 mg, 0.5 mmol, 1.0 equiv.),  $\text{K}_2\text{S}_2\text{O}_5$  (134 mg, 0.6 mmol, 1.2 equiv.), cucurbit[6]uril (25 mg, 0.025 mmol, 0.05 equiv.) and amine **1t** (99 mg, 0.5 mmol, 1.0 equiv.). The purification was performed by column chromatography on silica gel to provide the desired compound **4aa** (122 mg, 0.31 mmol, 61%).

White solid, mp 91 - 92 °C.  $^1\text{H NMR}$  (500 MHz,  $\text{CDCl}_3$ ):  $\delta$  4.40 (s, 4H,  $2\times\text{CH}_2$ ), 7.07 – 7.09 (m, 4H,  $\text{CH}_{\text{Ar}}$ ), 7.25 – 7.26 (m, 4H,  $\text{CH}_{\text{Ar}}$ ), 7.74 (d, 2H,  $^3J = 7.3$  Hz,  $\text{CH}_{\text{Ar}}$ ), 7.92 (d, 2H,  $^3J = 7.3$  Hz,  $\text{CH}_{\text{Ar}}$ ).

$^{13}\text{C}\{^1\text{H}\}$  NMR (126 MHz,  $\text{CDCl}_3$ ):  $\delta$  50.6, 123.2 (q,  $^1J_{\text{CF}} = 274.9$  Hz), 126.2 (m), 127.5, 127.8, 128.4, 128.5, 134.0 (q,  $^2J_{\text{CF}} = 32.9$  Hz), 135.0.

MS (GC, 70eV):  $m/z$  (%) = 405 ( $\text{M}^+$ , 2), 314 (12), 195 (19), 91 (100).

Anal. calcd. for  $\text{C}_{21}\text{H}_{18}\text{F}_3\text{NO}_2\text{S}$ : C, 62.21; H, 4.48; N, 3.45. Found: C, 62.18; H, 4.53; N, 3.52.

### **1-(methylsulfonyl)-4-(trifluoromethoxy)benzene 11.**

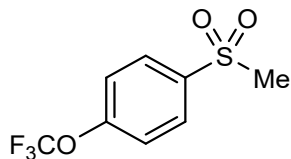

This compound was prepared starting from 1-bromo-4-(trifluoromethoxy)benzene **10** (241 mg, 1.0 mmol, 1.0 equiv.),  $\text{K}_2\text{S}_2\text{O}_5$  (267 mg, 1.2 mmol, 1.2 equiv.), cucurbit[6]uril (50 mg, 0.05 mmol, 0.05 equiv.),  $(\text{PPh}_3)_2\text{PdCl}_2$  (21 mg, 0.03 mmol, 0.03 equiv.) and MeI (426 mg, 3.0 mmol, 3.0 equiv.). The purification was performed by column chromatography on silica gel to provide the desired compound **11** (139 mg, 0.58 mmol, 58%).

White solid, mp 67-69 °C.  $^1\text{H NMR}$  (500 MHz,  $\text{CDCl}_3$ ):  $\delta$  3.06 (s, 3H, Me), 7.37(d, 2H,  $^3J = 8.7$  Hz,  $\text{CH}_{\text{Ar}}$ ), 7.98 (dt, 2H,  $^3J = 8.9$  Hz,  $^4J = 2.1$  Hz,  $\text{CH}_{\text{Ar}}$ ).

$^{13}\text{C}\{^1\text{H}\}$  NMR (126 MHz,  $\text{CDCl}_3$ ):  $\delta$  44.4, 120.1 (q,  $^1J_{\text{CF}} = 257.9$  Hz), 121.1, 129.6 (m), 129.7, 138.7, 152.9.

Anal. calcd. for  $\text{C}_8\text{H}_7\text{F}_3\text{O}_3\text{S}$ : C, 40.00; H, 2.94. Found: C, 40.12; H, 3.06.

### **sulfonyldibenzene 13.**

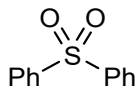

This compound was prepared starting from bromobenzene **12** (157 mg, 1.0 mmol, 1.0 equiv.),  $K_2S_2O_5$  (267 mg, 1.2 mmol, 1.2 equiv.), cucurbit[6]uril (50 mg, 0.05 mmol, 0.05 equiv.),  $(PPh_3)_2PdCl_2$  (21 mg, 0.03 mmol, 0.03 equiv.) and boronic acid (122 mg, 1.0 mmol, 1.0 equiv.). The purification was performed by column chromatography on silica gel to provide the desired compound **13** (153 mg, 0.70 mmol, 70%).

White solid, mp 125-126 °C.  $^1H$  NMR (500 MHz,  $CDCl_3$ ):  $\delta$  7.45 (t, 4H,  $^3J = 8.4$  Hz,  $CH_{Ar}$ ), 7.50 – 7.52 (m, 2H,  $CH_{Ar}$ ), 7.92 (d, 4H,  $^3J = 7.6$  Hz,  $CH_{Ar}$ ).

$^{13}C\{^1H\}$  NMR (126 MHz,  $CDCl_3$ ):  $\delta$  124.4, 129.1, 133.1, 141.3.

Anal. calcd. for  $C_{12}H_{10}O_2S$ : C, 66.03; H, 4.62. Found: C, 66.13; H, 4.69.

(C) Copies  $^1\text{H}$  and  $^{13}\text{C}$  NMR spectra.

Compound 1f

SpinWorks 4: IVA 2423 1H CDCI3

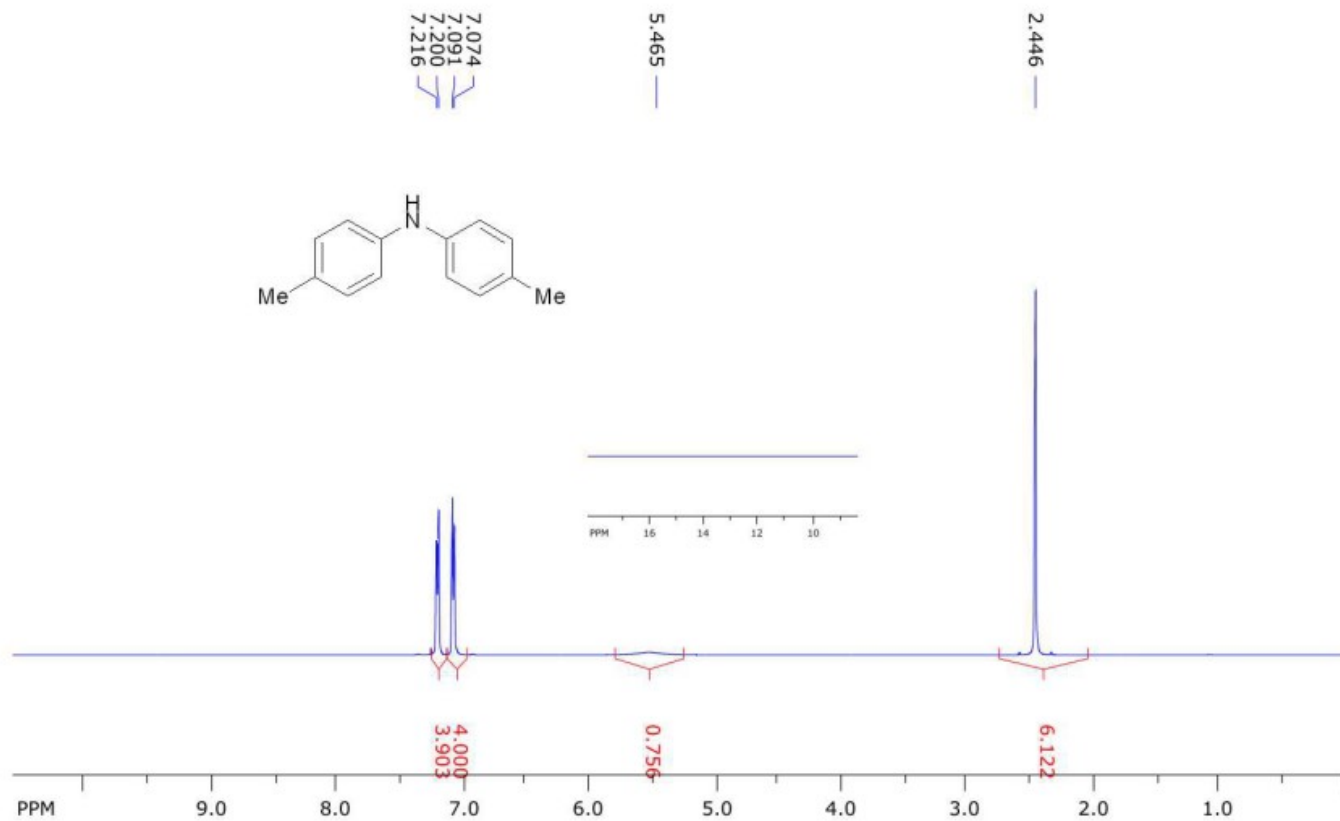

file: D:\NAPO\NMR\500-2\mkr13004\13\fid exp: <zg30>  
transmitter freq.: 500.133001 MHz  
time domain size: 65536 points  
width: 12335.53 Hz = 24.6645 ppm = 0.188225 Hz/pt  
number of scans: 24

freq. of 0 ppm: 500.130022 MHz  
processed size: 65536 complex points  
LB: 0.300 GF: 0.0000  
Hz/cm: 213.416 ppm/cm: 0.42672

**Compound 1f**

SpinWorks 4: IVA 2423 13C CDCl3

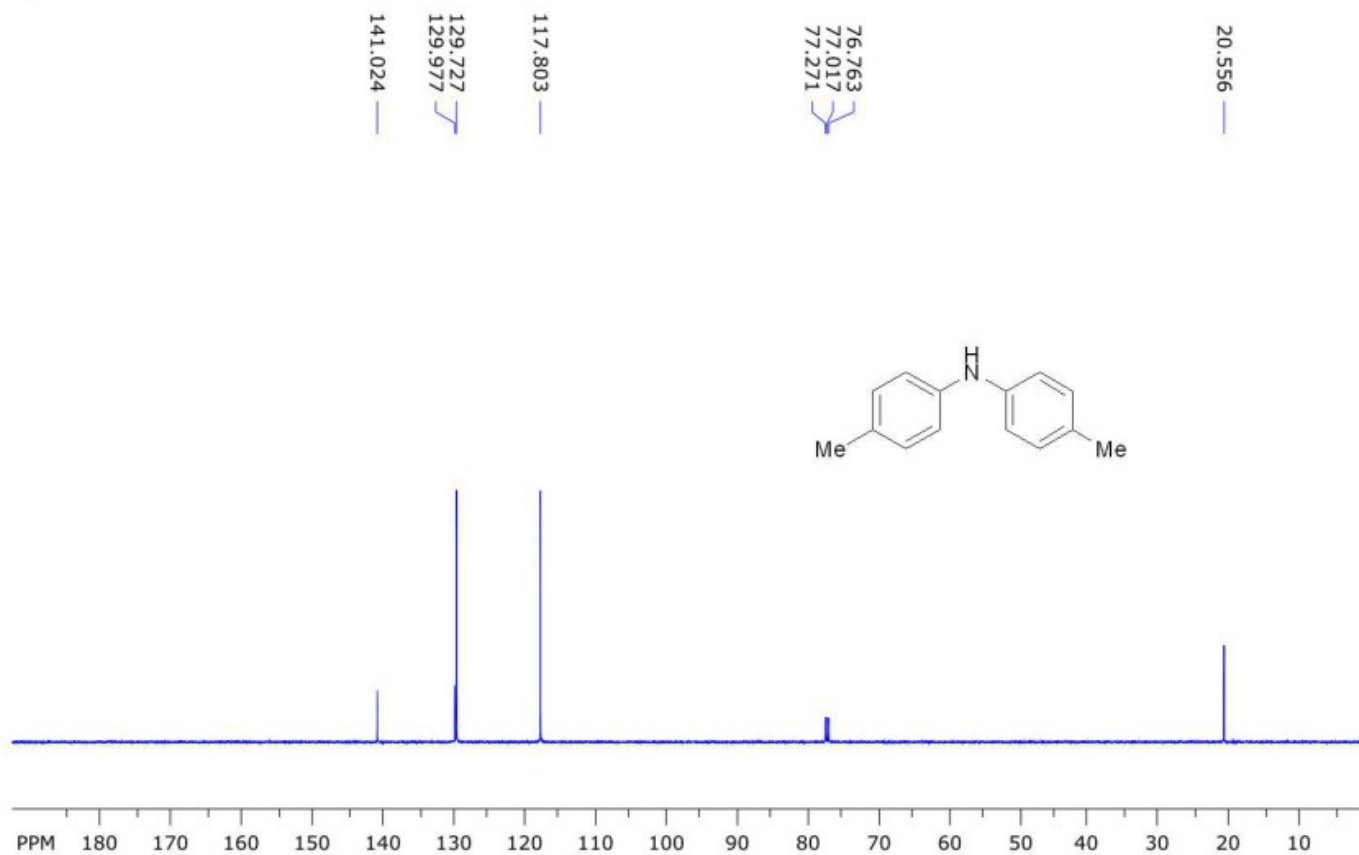

file: D:\NAPO\NMR\500-2\mkr13004\14\fid expt: <zgpg30>  
transmitter freq.: 125.772879 MHz  
time domain size: 65536 points  
width: 36057.69 Hz = 286.6889 ppm = 0.550197 Hz/pt  
number of scans: 64

freq. of 0 ppm: 125.757824 MHz  
processed size: 32768 complex points  
LB: 2.000 GF: 0.0000  
Hz/cm: 971.643 ppm/cm: 7.72538

**Compound 1u**

SpinWorks 4: IVA 2432 1H CDCl3

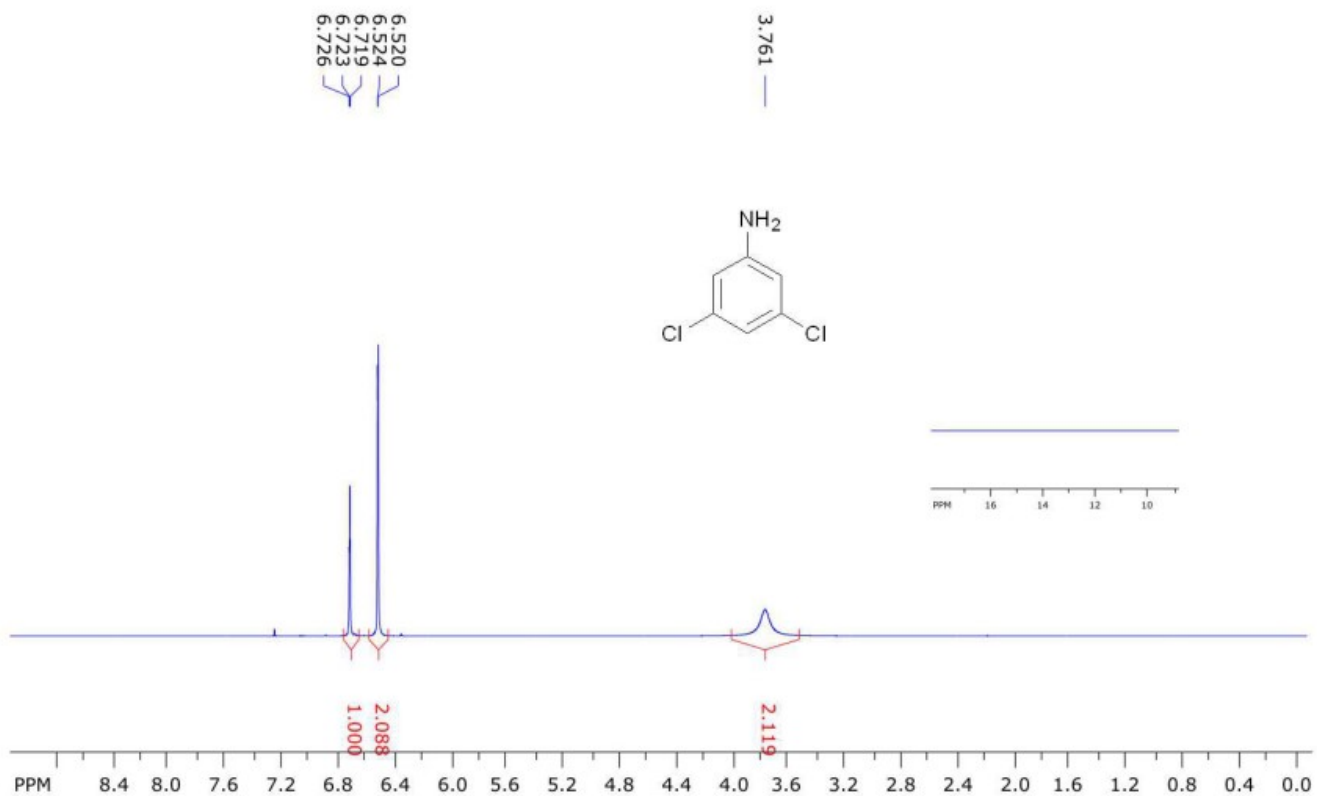

file: D:\NAPO\NMR\500-2\mkr13004\23\fid expt: <zg30>  
transmitter freq.: 500.133001 MHz  
time domain size: 65536 points  
width: 12335.53 Hz = 24.6645 ppm = 0.188225 Hz/pt  
number of scans: 24

freq. of 0 ppm: 500.130023 MHz  
processed size: 65536 complex points  
LB: 0.300 GF: 0.0000  
Hz/cm: 185.033 ppm/cm: 0.36997

**Compound 1u**



SpinWorks 4: IVA 2432 13c CDCL3

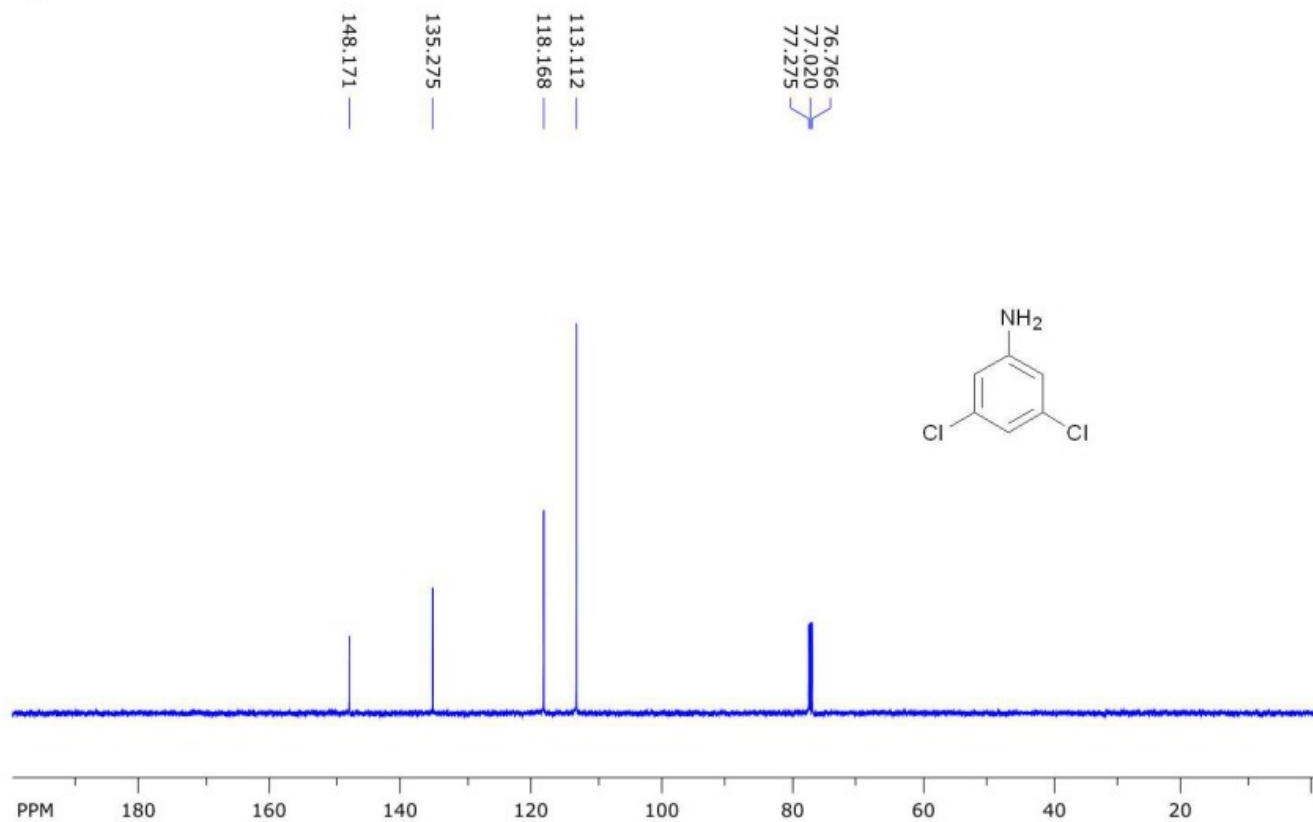

file: D:\NAPO\NMR\500-2\mkr13004\24\fid expt: <zgpg30>  
transmitter freq.: 125.772879 MHz  
time domain size: 65536 points  
width: 36057.69 Hz = 286.6889 ppm = 0.550197 Hz/pt  
number of scans: 64

freq. of 0 ppm: 125.757805 MHz  
processed size: 32768 complex points  
LB: 2.000 GF: 0.0000  
Hz/cm: 1011.530 ppm/cm: 8.04251

**Compound 1v**

SpinWorks 4: IVA 1341 1H DMSO

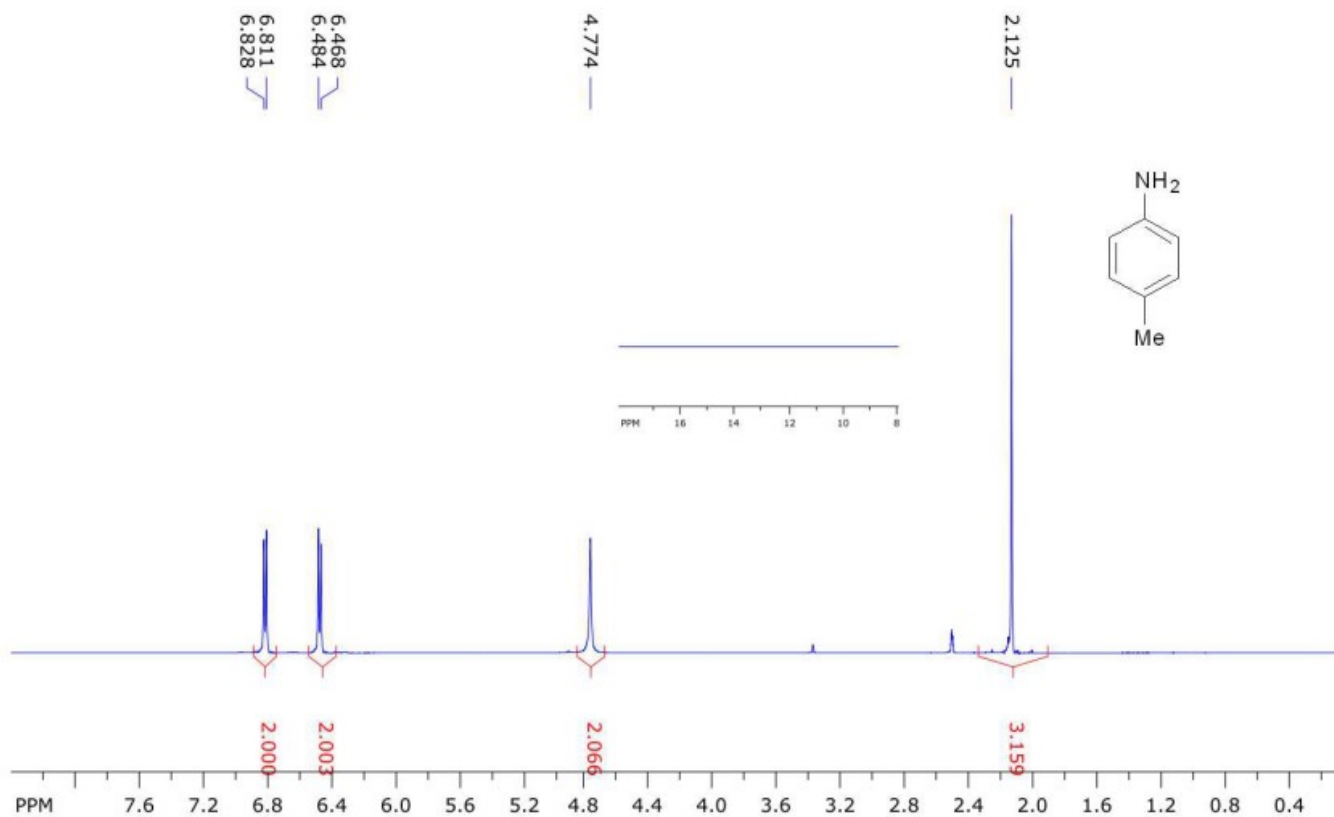

file: D:\NAPO\NMR\500-2\mkr12112\5\fid expt: <zg30>  
transmitter freq.: 500.133001 MHz  
time domain size: 65536 points  
width: 12335.53 Hz = 24.6645 ppm = 0.188225 Hz/pt  
number of scans: 24

freq. of 0 ppm: 500.130005 MHz  
processed size: 65536 complex points  
LB: 0.300 GF: 0.0000  
Hz/cm: 167.567 ppm/cm: 0.33504

**Compound 1v**

SpinWorks 4: IVA 1341 13C DMSO

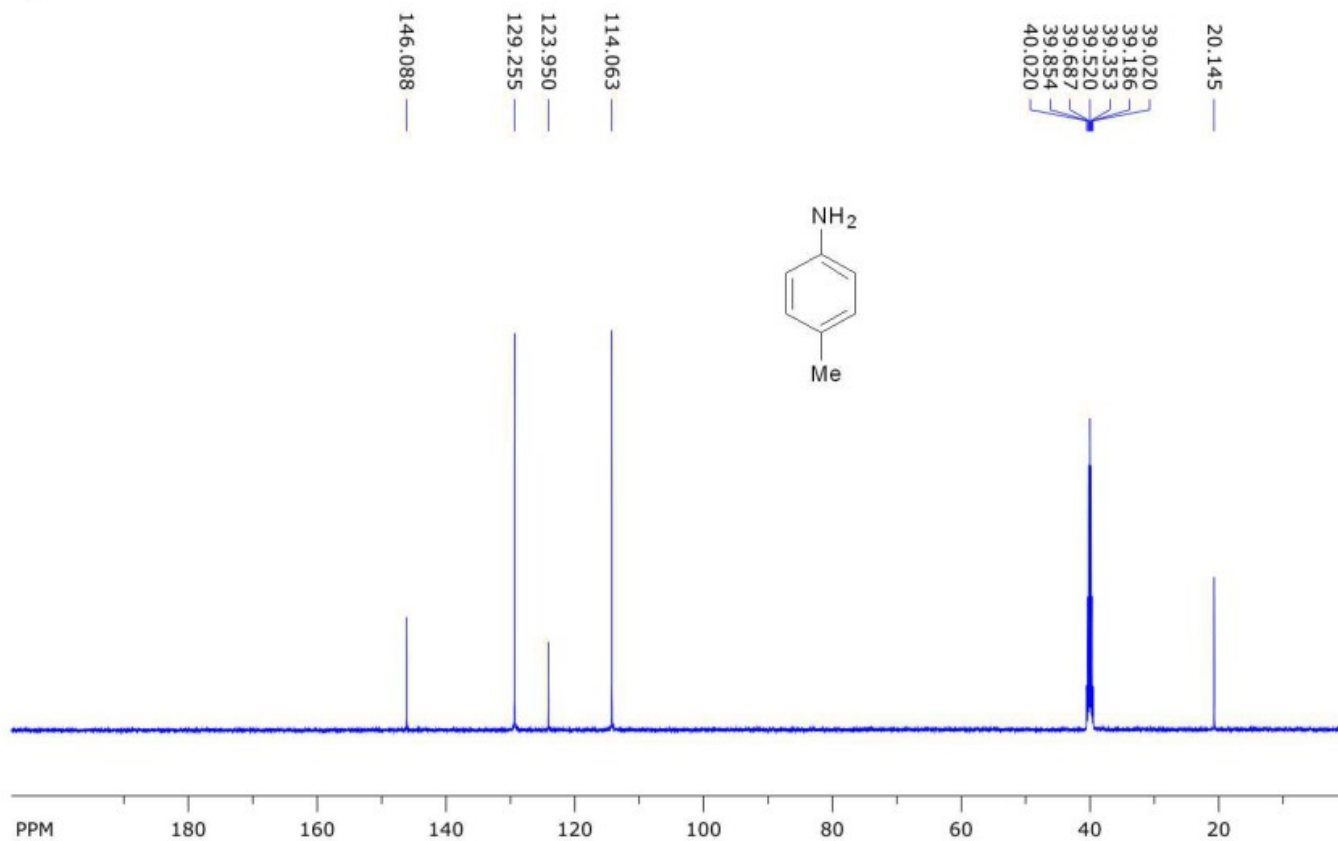

file: D:\NAPO\NMR\500-2\mkr12112\6\fid expt: <zpgg30>  
transmitter freq.: 125.772879 MHz  
time domain size: 65536 points  
width: 36057.69 Hz = 286.6889 ppm = 0.550197 Hz/pt  
number of scans: 512

freq. of 0 ppm: 125.757843 MHz  
processed size: 32768 complex points  
LB: 2.000 GF: 0.0000  
Hz/cm: 1048.226 ppm/cm: 8.33428

**Compound 4a**

SpinWorks 4: IVA 2979 1H CDCl3

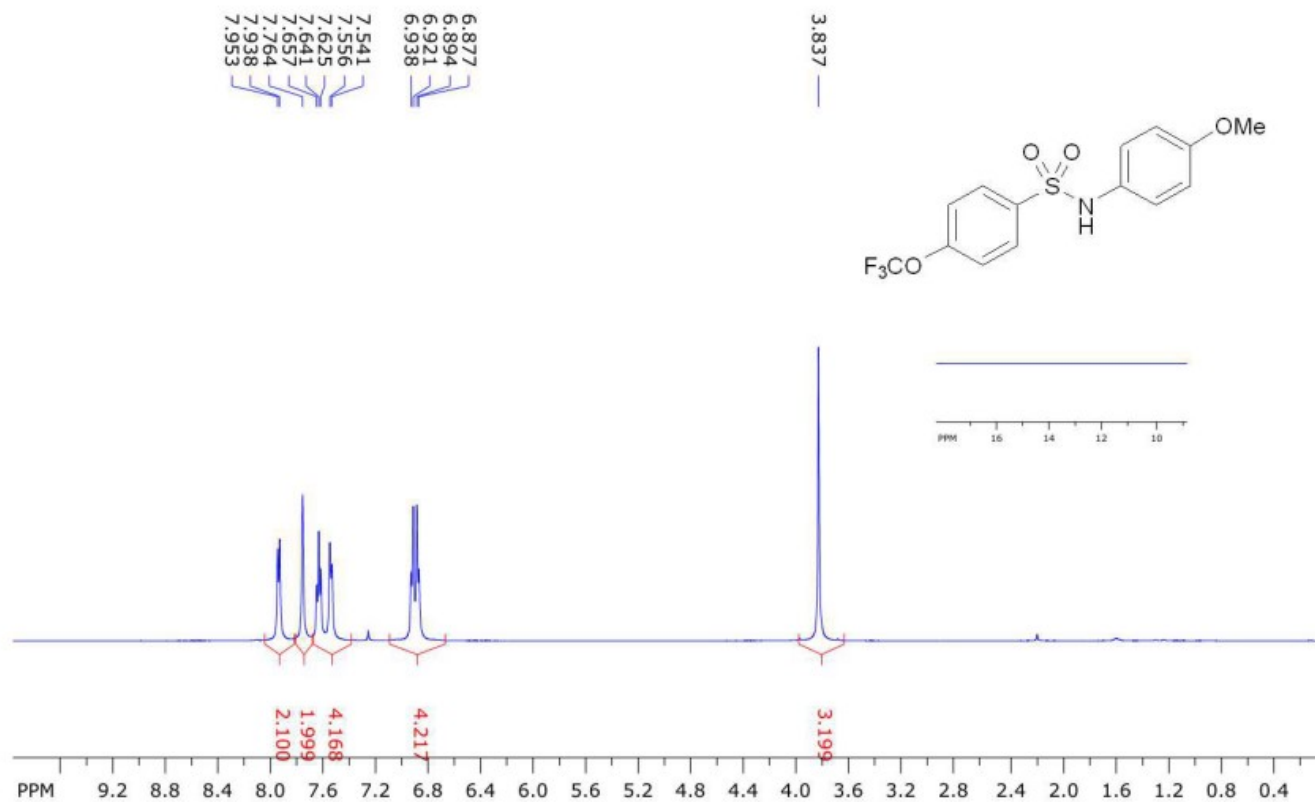

file: ...NAPO\NMR\500-2\mkr10907\5 2979\fid expt: <zg30>  
transmitter freq.: 500.133001 MHz  
time domain size: 65536 points  
width: 12335.53 Hz = 24.6645 ppm = 0.188225 Hz/pt  
number of scans: 24

freq. of 0 ppm: 500.130021 MHz  
processed size: 65536 complex points  
LB: 0.300 GF: 0.0000  
Hz/cm: 199.224 ppm/cm: 0.39834

**Compound 4a**

SpinWorks 4: IVA 2979 13C CDCl3

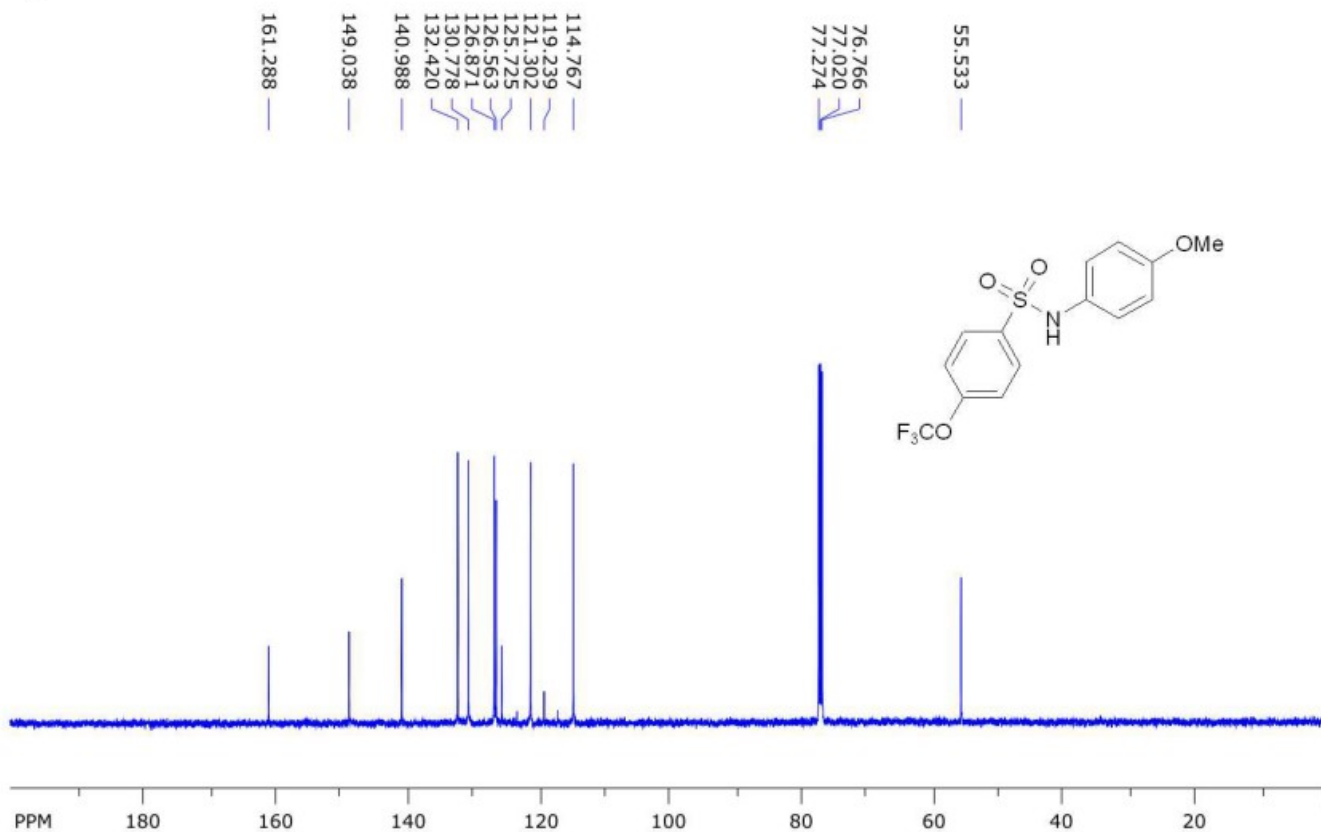

file: D:\NAPO\NMR\500-2\mkr10907\6\fid expt: <zgpg30>  
transmitter freq.: 125.772879 MHz  
time domain size: 65536 points  
width: 36057.69 Hz = 286.6889 ppm = 0.550197 Hz/pt  
number of scans: 512

freq. of 0 ppm: 125.757793 MHz  
processed size: 32768 complex points  
LB: 2.000 GF: 0.0000  
Hz/cm: 1016.316 ppm/cm: 8.08057

**Compound 4b**

SpinWorks 4: IVA 3052 1H CDCl3

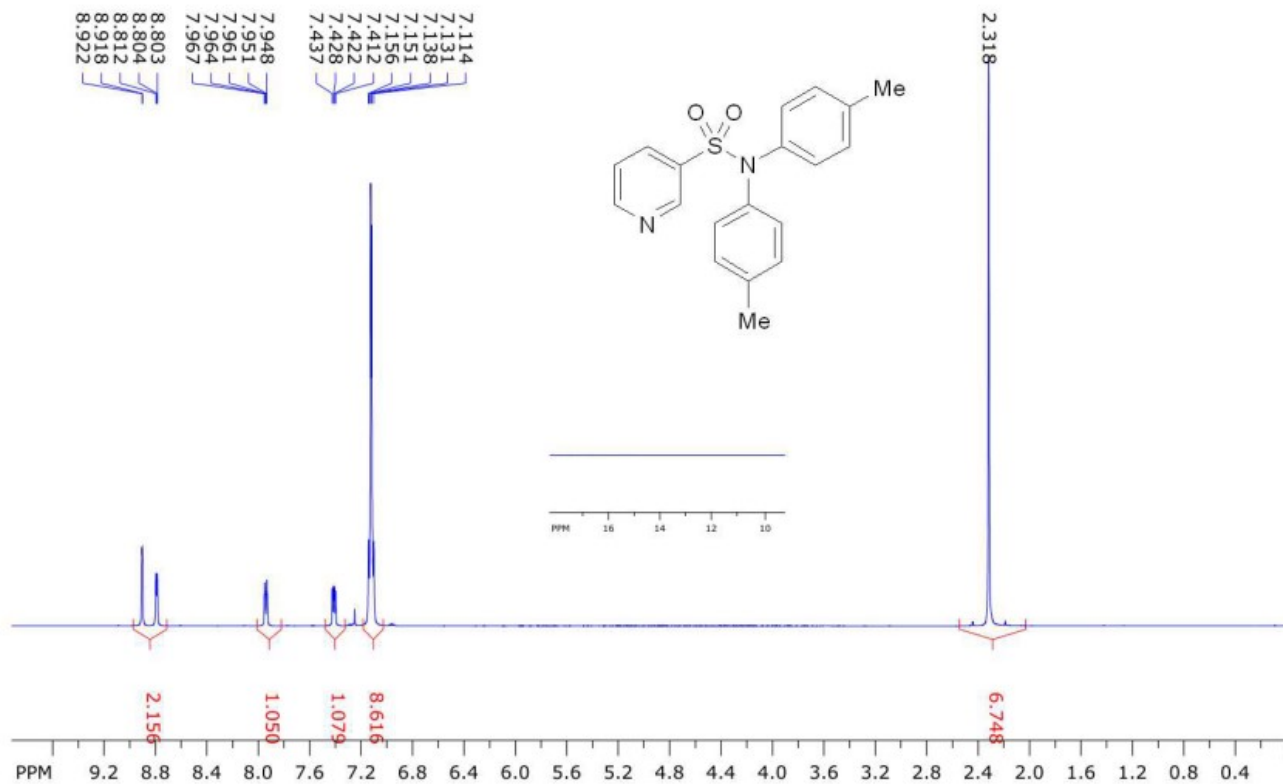

file: ...APO\NMR\500-2\mkr10307\17 3052\fid expt: <zg30>  
transmitter freq.: 500.133001 MHz  
time domain size: 65536 points  
width: 12335.53 Hz = 24.6645 ppm = 0.188225 Hz/pt  
number of scans: 24

freq. of 0 ppm: 500.130022 MHz  
processed size: 65536 complex points  
LB: 0.300 GF: 0.0000  
Hz/cm: 199.770 ppm/cm: 0.39943

### Compound 4b

SpinWorks 4: IVA 3052 13C CDCl3

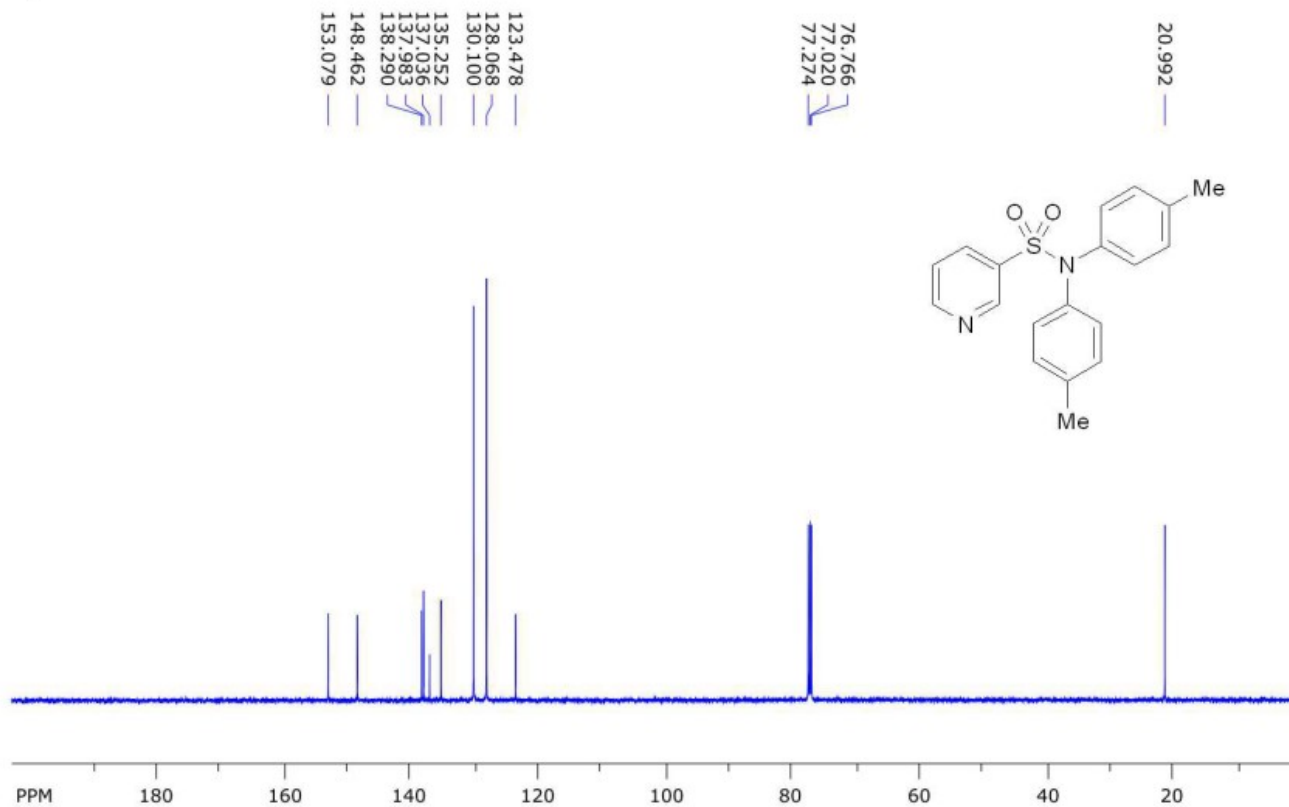

file: D:\NAPO\NMR\500-2\mkr10307\18\fid expt: <zgpg30>  
transmitter freq.: 125.772879 MHz  
time domain size: 65536 points  
width: 36057.69 Hz = 286.6889 ppm = 0.550197 Hz/pt  
number of scans: 512

freq. of 0 ppm: 125.757800 MHz  
processed size: 32768 complex points  
LB: 2.000 GF: 0.0000  
Hz/cm: 1019.507 ppm/cm: 8.10594

**Compound 4c**

SpinWorks 4: IVA 2097 1H DMSO

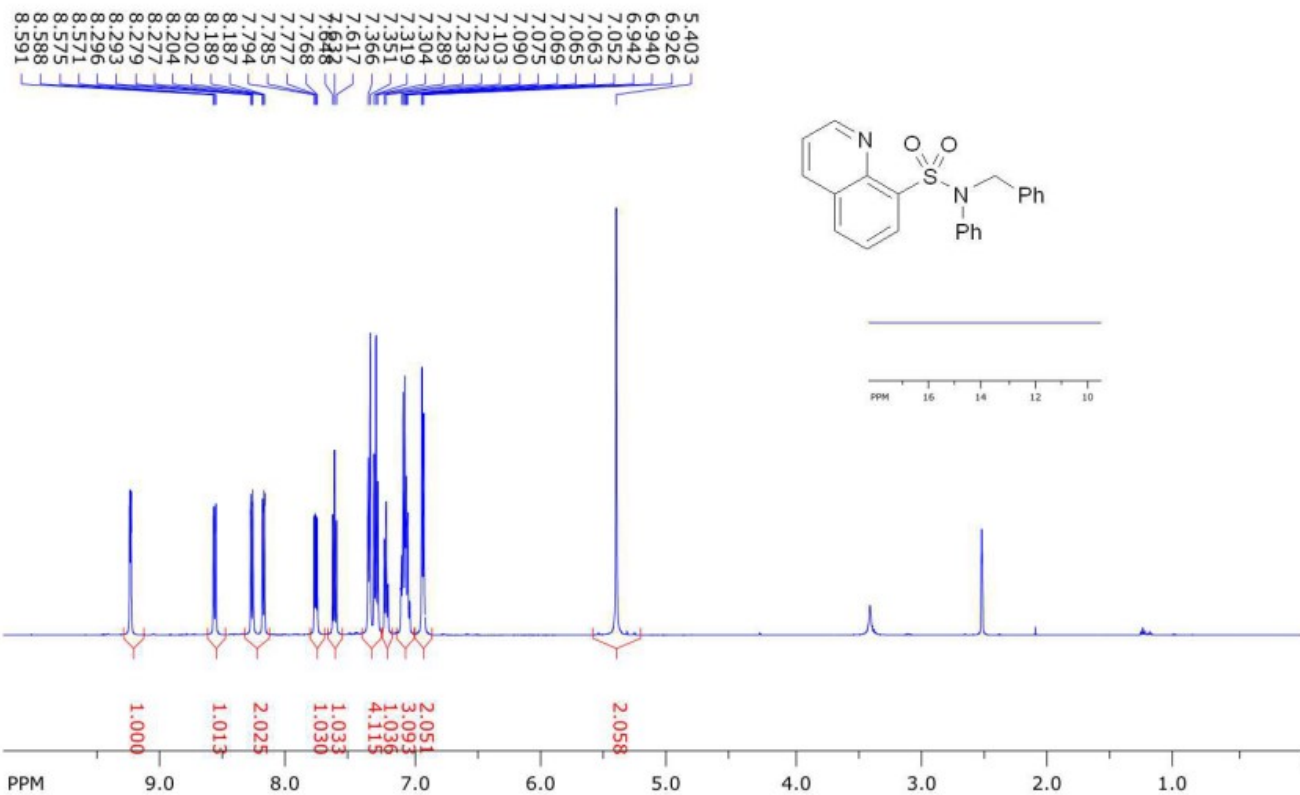

file: ...APO\NMR\500-2\mkr10508\27 2097\fid exp: <zg30>  
transmitter freq.: 500.133001 MHz  
time domain size: 65536 points  
width: 12335.53 Hz = 24.6645 ppm = 0.188225 Hz/pt  
number of scans: 24

freq. of 0 ppm: 500.130000 MHz  
processed size: 65536 complex points  
LB: 0.300 GF: 0.0000  
Hz/cm: 205.774 ppm/cm: 0.41144

**Compound 4c**



SpinWorks 4: IVA 2097 13C DMSO

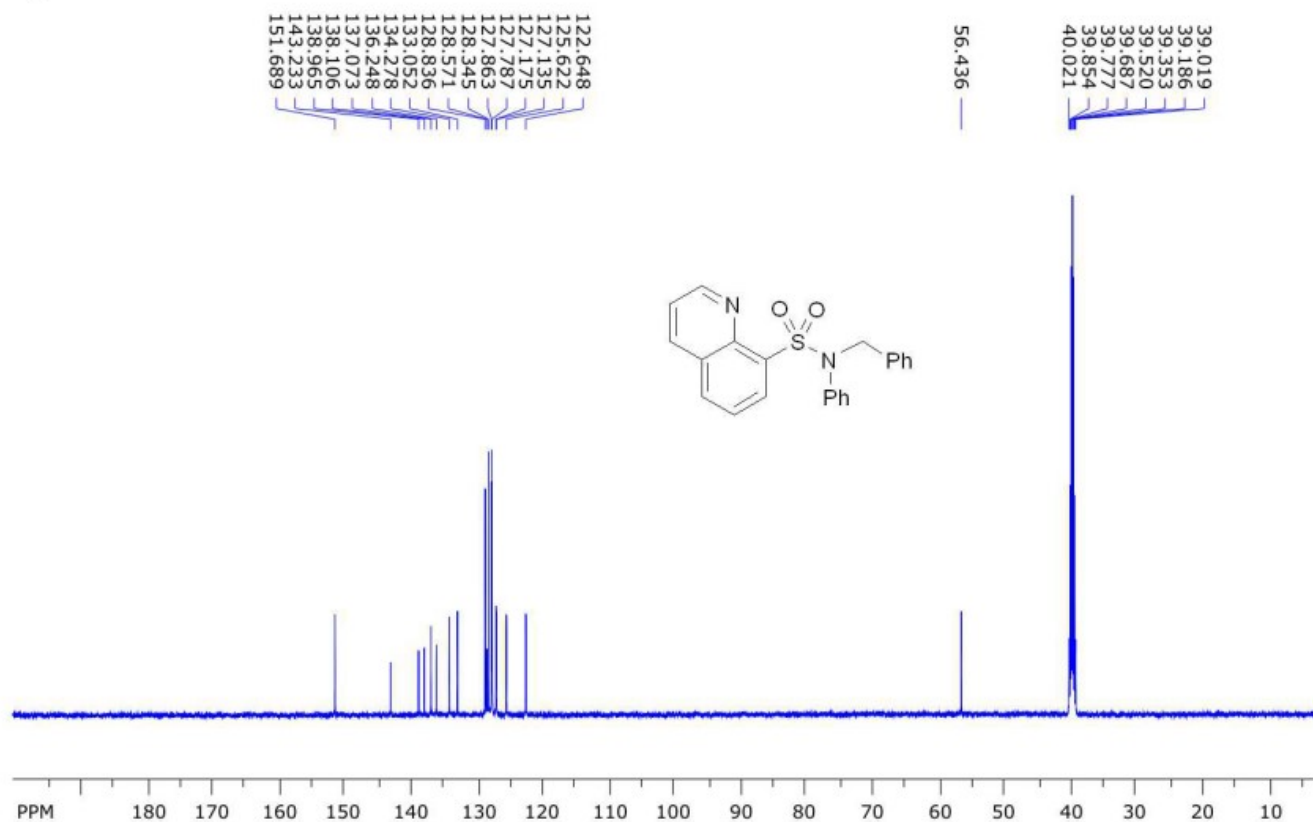

file: D:\NAPO\NMR\500-2\mkr10508\28\fid expt: <zpgg30>  
transmitter freq.: 125.772879 MHz  
time domain size: 65536 points  
width: 36057.69 Hz = 286.6889 ppm = 0.550197 Hz/pt  
number of scans: 512

freq. of 0 ppm: 125.757846 MHz  
processed size: 32768 complex points  
LB: 2.000 GF: 0.0000  
Hz/cm: 998.766 ppm/cm: 7.94103

**Compound 4d**

SpinWorks 4: IVA 2983 1H CDCl3

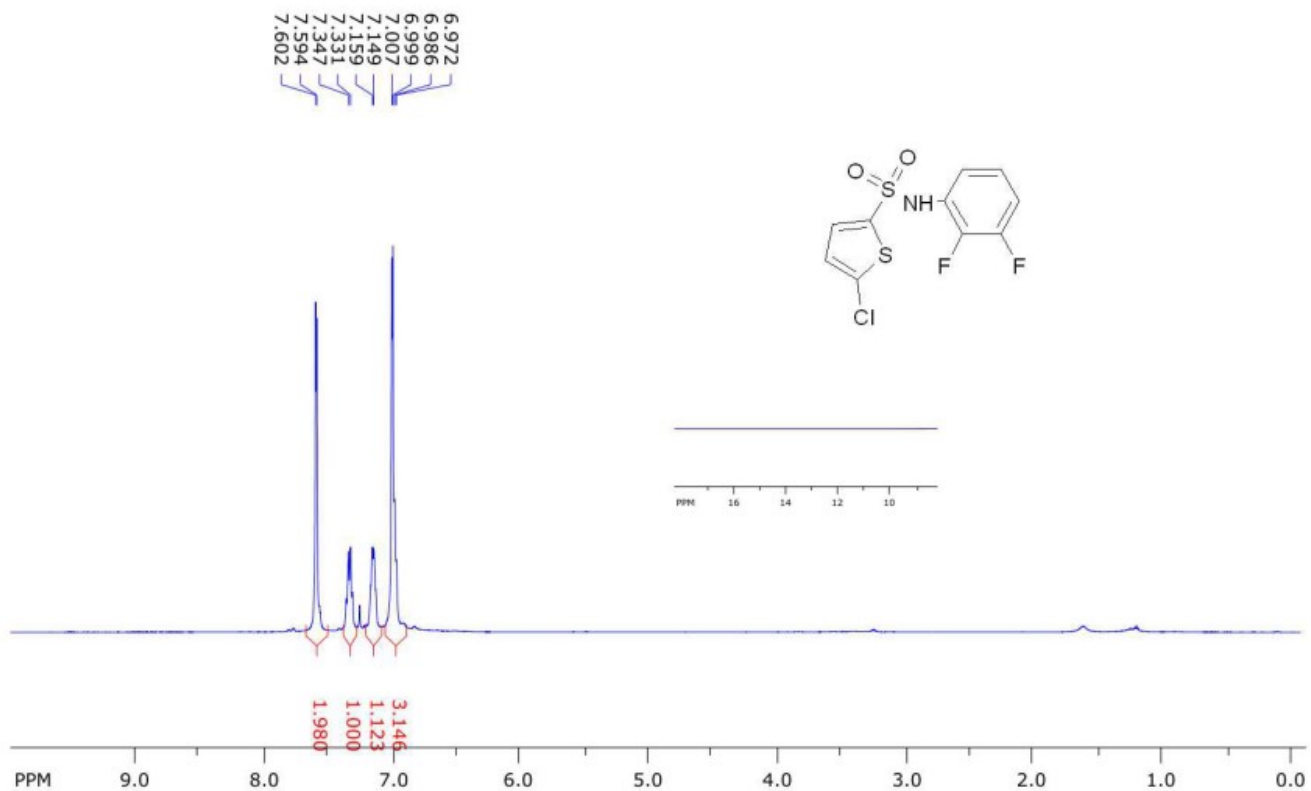

file: ...NAPO\NMR\500-2\mkr12606\5 2983\fid expt: <zg30>  
transmitter freq.: 500.133001 MHz  
time domain size: 65536 points  
width: 12335.53 Hz = 24.6645 ppm = 0.188225 Hz/pt  
number of scans: 24

freq. of 0 ppm: 500.130024 MHz  
processed size: 65536 complex points  
LB: 0.300 GF: 0.0000  
Hz/cm: 201.953 ppm/cm: 0.40380

**Compound 4d**

SpinWorks 4: IVA 2983 13C CDCL3

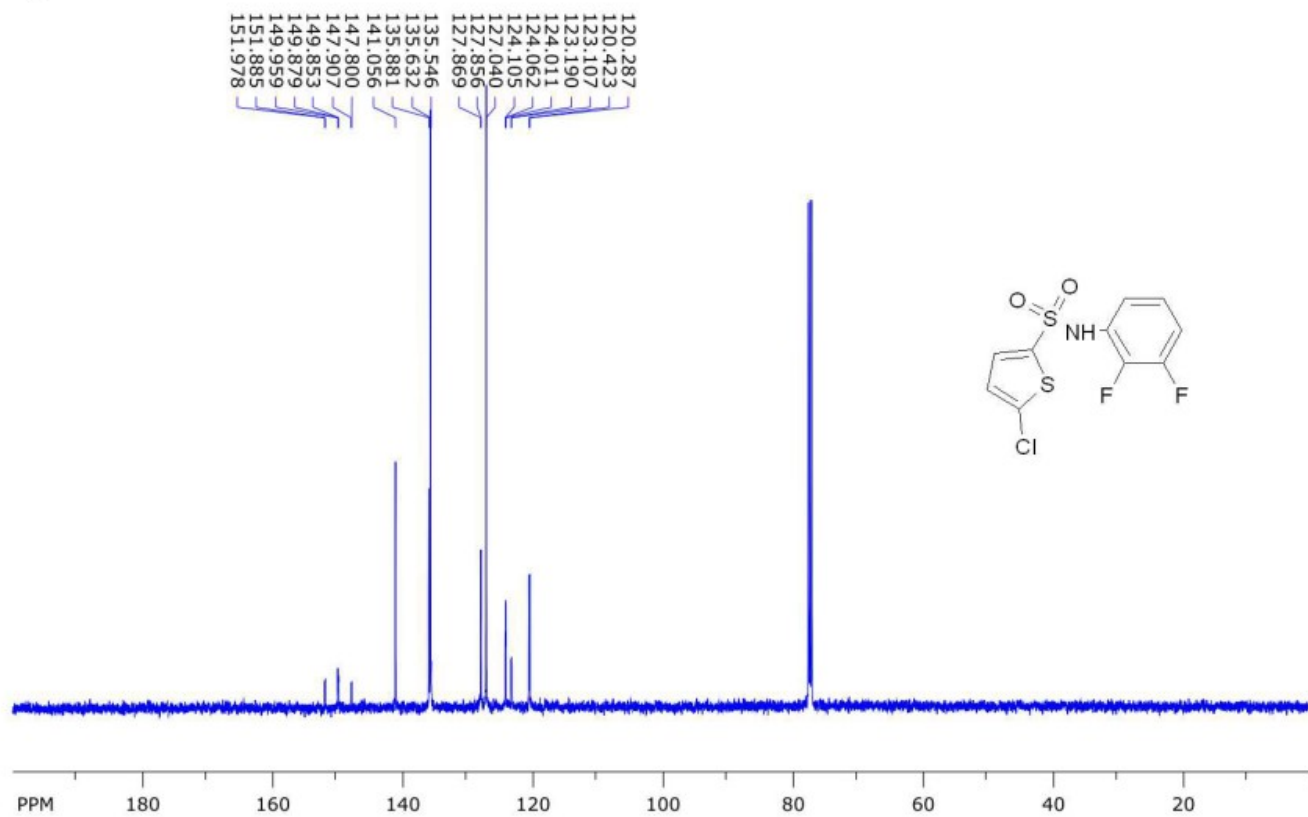

file: D:\NAPO\NMR\500-2\mkr12606\6\fid expt: <zgpg30>  
transmitter freq.: 125.772879 MHz  
time domain size: 65536 points  
width: 36057.69 Hz = 286.6889 ppm = 0.550197 Hz/pt  
number of scans: 512

freq. of 0 ppm: 125.757797 MHz  
processed size: 32768 complex points  
LB: 2.000 GF: 0.0000  
Hz/cm: 1006.744 ppm/cm: 8.00446

**Compound 4e**

SpinWorks 4: IVA 2900 1H

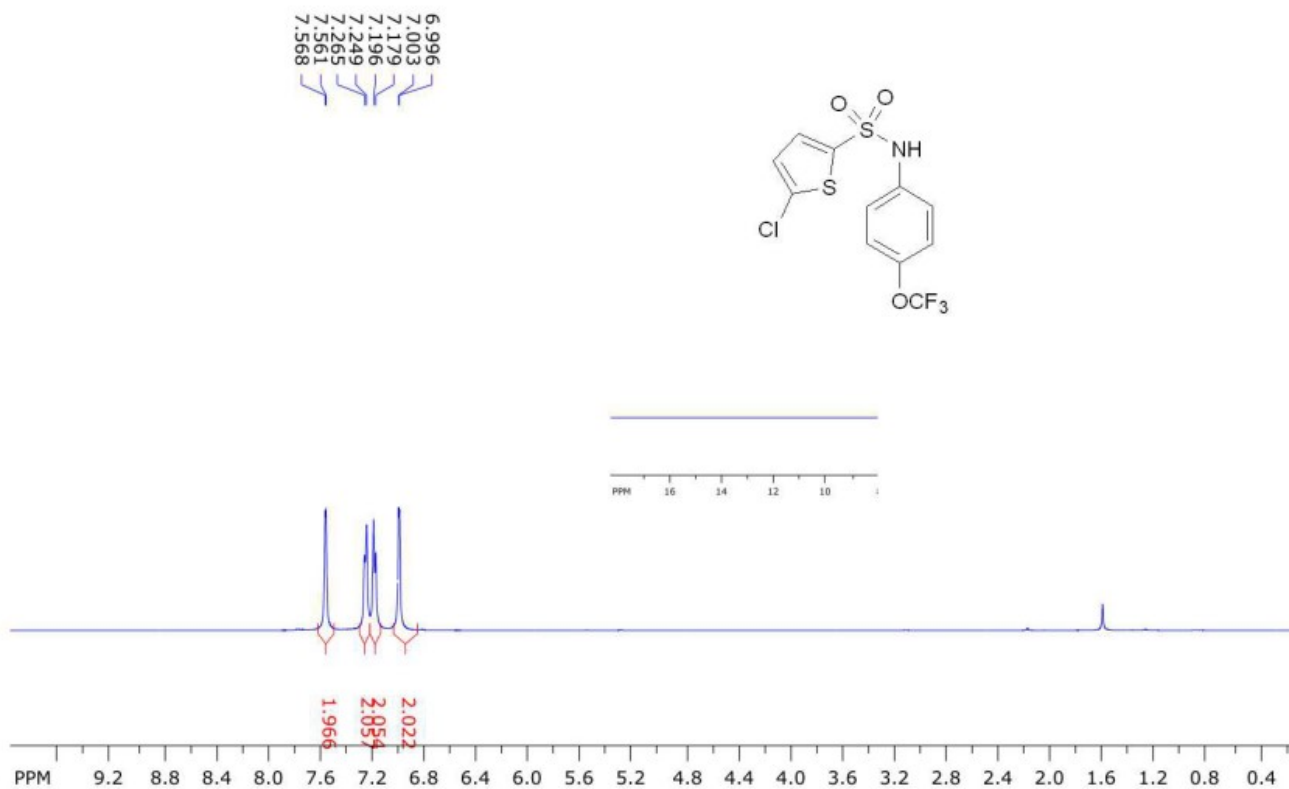

file: ...NAPO\NMR\500-2\mkr10706\1 2900\fid expt: <zg30>  
transmitter freq.: 500.133001 MHz  
time domain size: 65536 points  
width: 12335.53 Hz = 24.6645 ppm = 0.188225 Hz/pt  
number of scans: 24

freq. of 0 ppm: 500.130024 MHz  
processed size: 65536 complex points  
LB: 0.300 GF: 0.0000  
Hz/cm: 198.133 ppm/cm: 0.39616

**Compound 4e**

SpinWorks 4: IVA 2900 13C

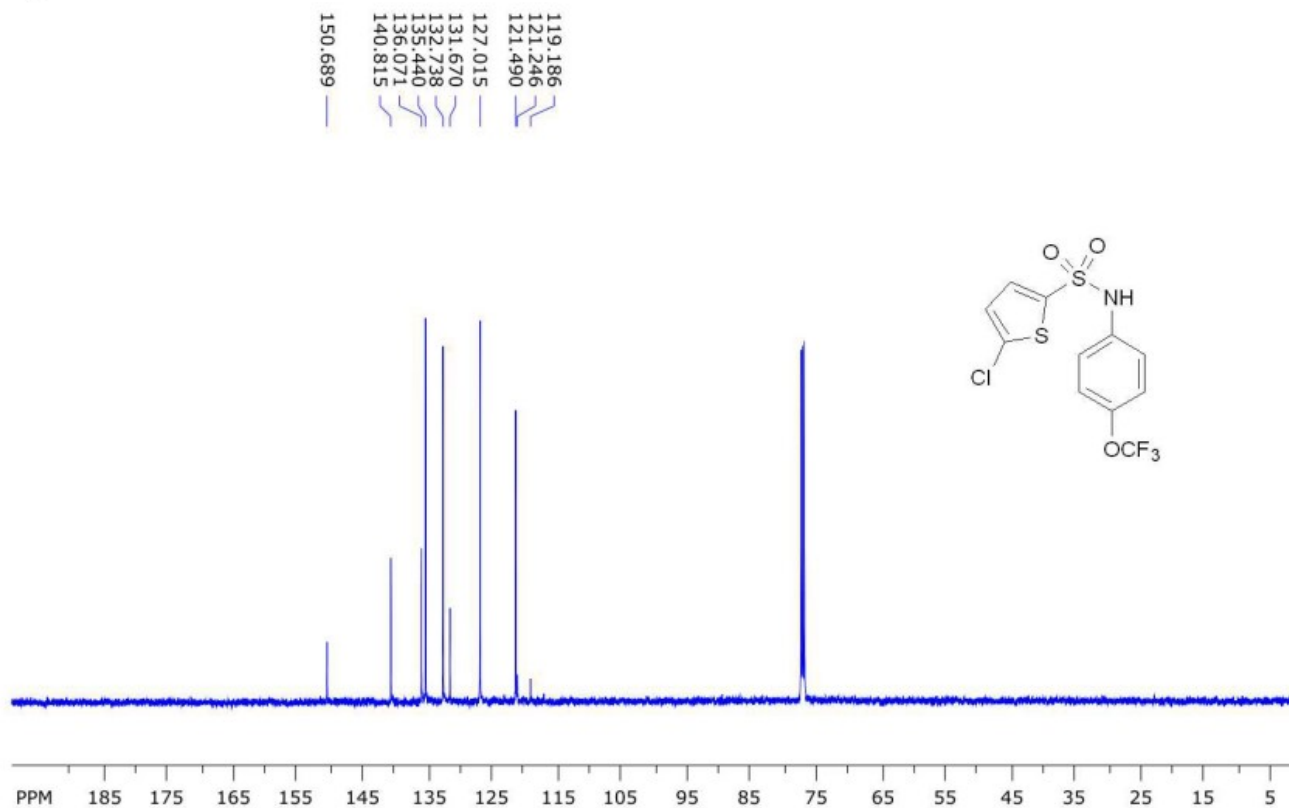

file: D:\NAPO\NMR\500-2\mkr10706\2\fid exp: <zggp30>  
transmitter freq.: 125.772879 MHz  
time domain size: 65536 points  
width: 36057.69 Hz = 286.6889 ppm = 0.550197 Hz/pt  
number of scans: 512

freq. of 0 ppm: 125.757796 MHz  
processed size: 32768 complex points  
LB: 2.000 GF: 0.0000  
Hz/cm: 1000.362 ppm/cm: 7.95372

**Compound 4f**

SpinWorks 4: IVA 2403 1H

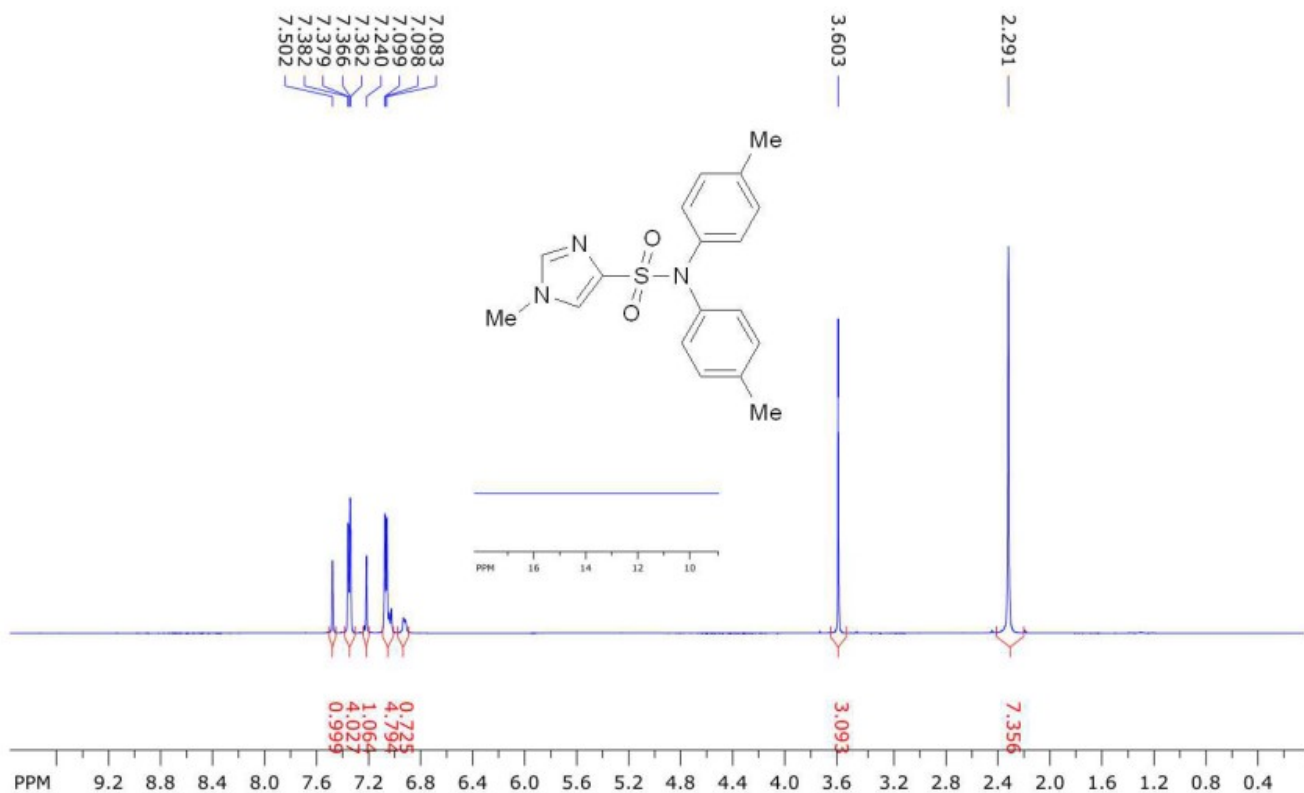

file: D:\NAPO\NMR\500-2\mkr23004\21\fid expt: <zg30>  
transmitter freq.: 500.133001 MHz  
time domain size: 65536 points  
width: 12335.53 Hz = 24.6645 ppm = 0.188225 Hz/pt  
number of scans: 24

freq. of 0 ppm: 500.130024 MHz  
processed size: 65536 complex points  
LB: 0.300 GF: 0.0000  
Hz/cm: 199.770 ppm/cm: 0.39943

**Compound 4f**

SpinWorks 4: IVA 2403 13C

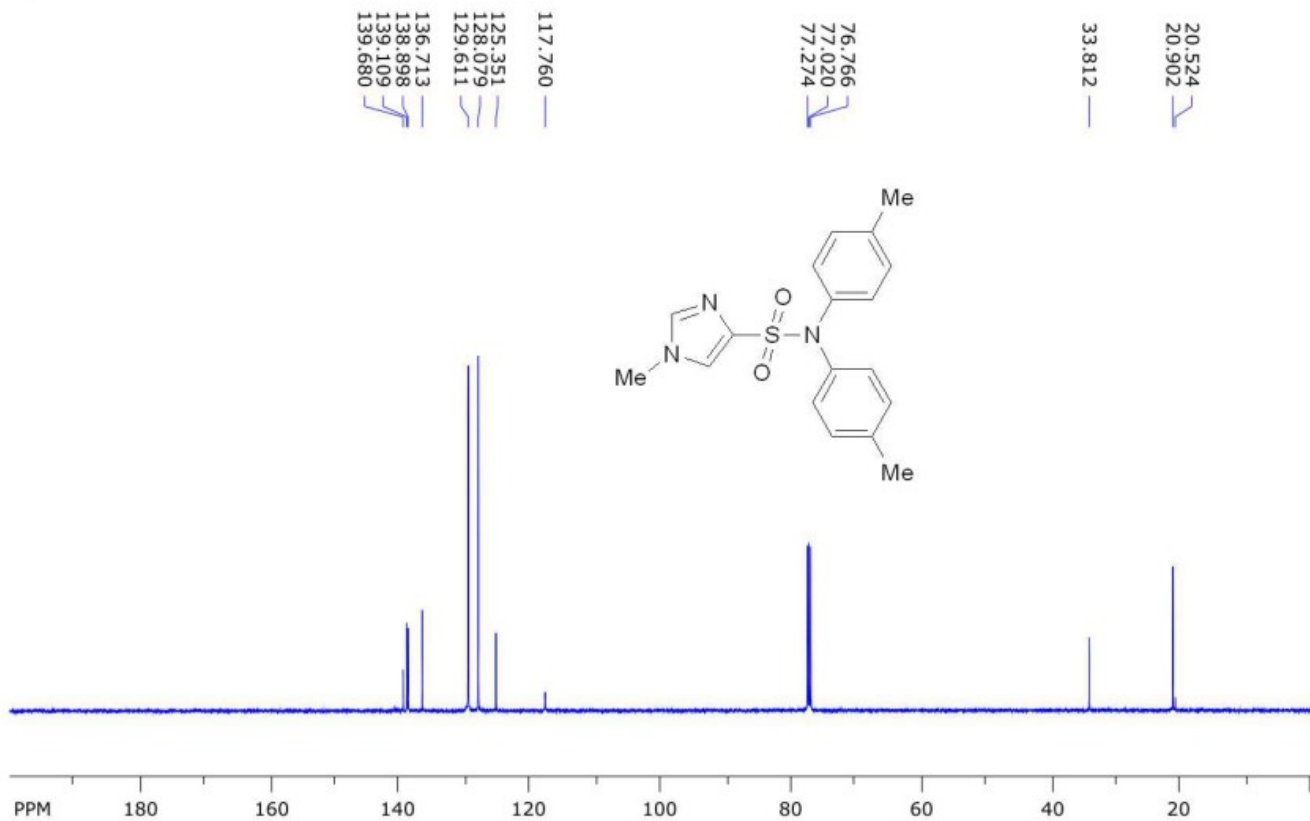

file: D:\NAPO\NMR\500-2\mkr23004\22\fid exp: <zpgp30>  
transmitter freq.: 125.772879 MHz  
time domain size: 65536 points  
width: 36057.69 Hz = 286.6889 ppm = 0.550197 Hz/pt  
number of scans: 512

freq. of 0 ppm: 125.757809 MHz  
processed size: 32768 complex points  
LB: 2.000 GF: 0.0000  
Hz/cm: 1013.125 ppm/cm: 8.05520

**Compound 4g**

SpinWorks 4: IVA 2932 1H

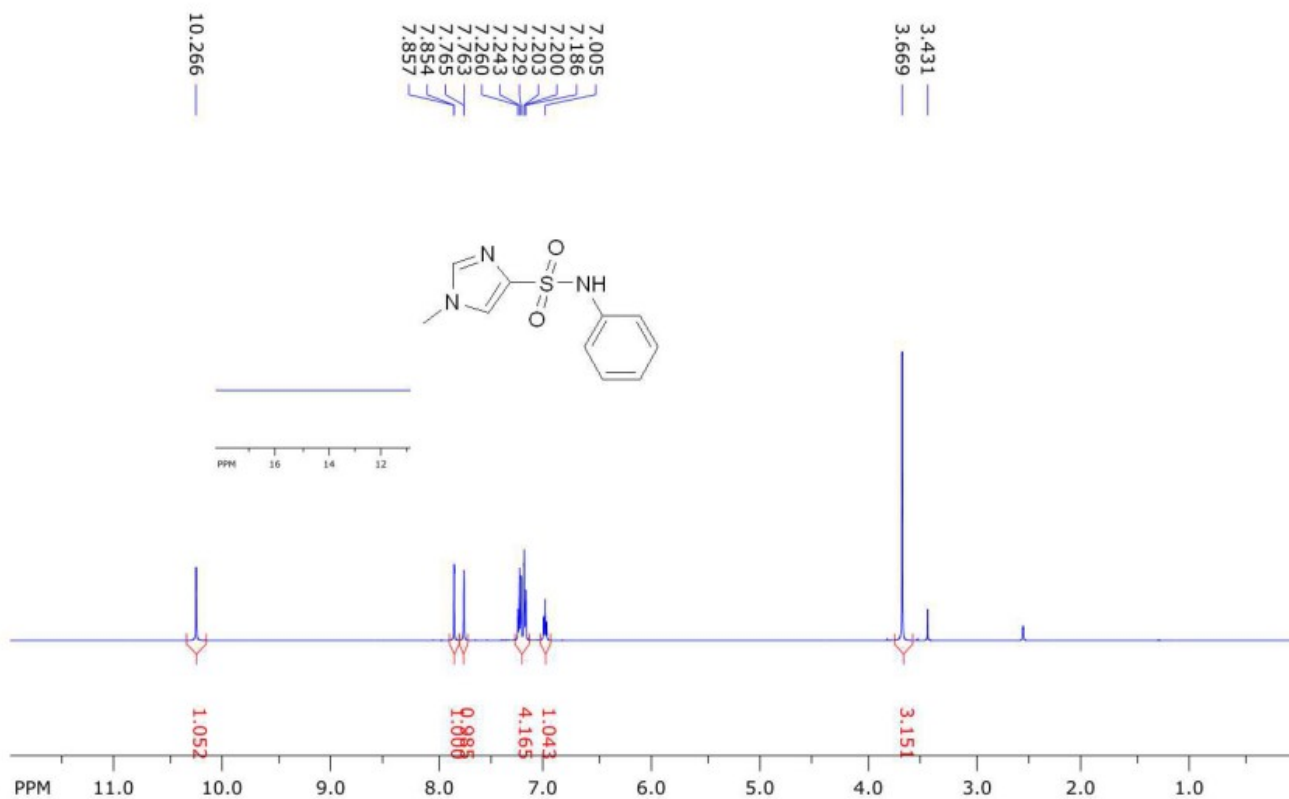

file: ...APO\NMR\500-2\mkr10207\13 2392\fid expt: <zg30>  
transmitter freq.: 500.133001 MHz  
time domain size: 65536 points  
width: 12335.53 Hz = 24.6645 ppm = 0.188225 Hz/pt  
number of scans: 24

freq. of 0 ppm: 500.129985 MHz  
processed size: 65536 complex points  
LB: 0.300 GF: 0.0000  
Hz/cm: 240.707 ppm/cm: 0.48128

**Compound 4g**



SpinWorks 4: IVA 2392 13C

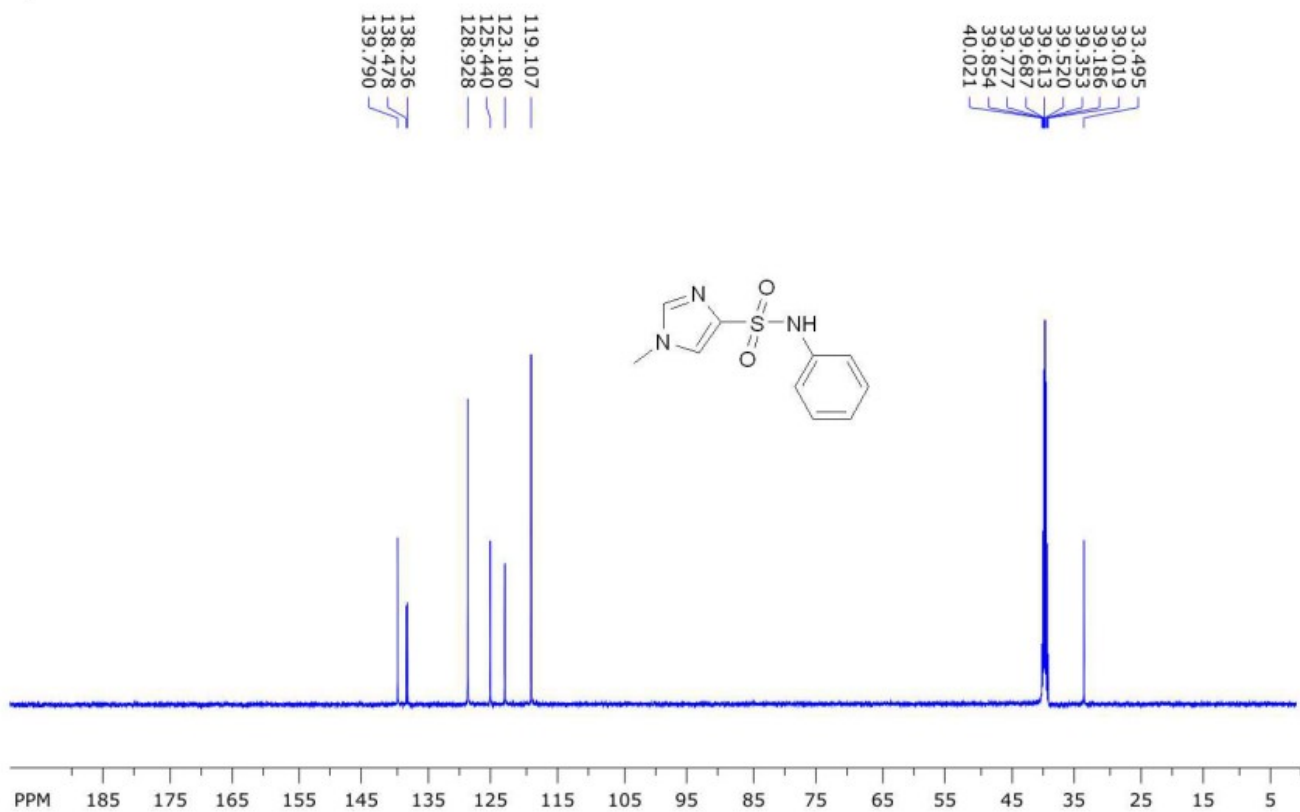

file: D:\NAPO\NMR\500-2\mkr10207\14\fid expt: <zpgg30>  
transmitter freq.: 125.772879 MHz  
time domain size: 65536 points  
width: 36057.69 Hz = 286.6889 ppm = 0.550197 Hz/pt  
number of scans: 512

freq. of 0 ppm: 125.757840 MHz  
processed size: 32768 complex points  
LB: 2.000 GF: 0.0000  
Hz/cm: 1001.957 ppm/cm: 7.96640

### Compound 4h

SpinWorks 4: IVA 3014 1H CDCl3

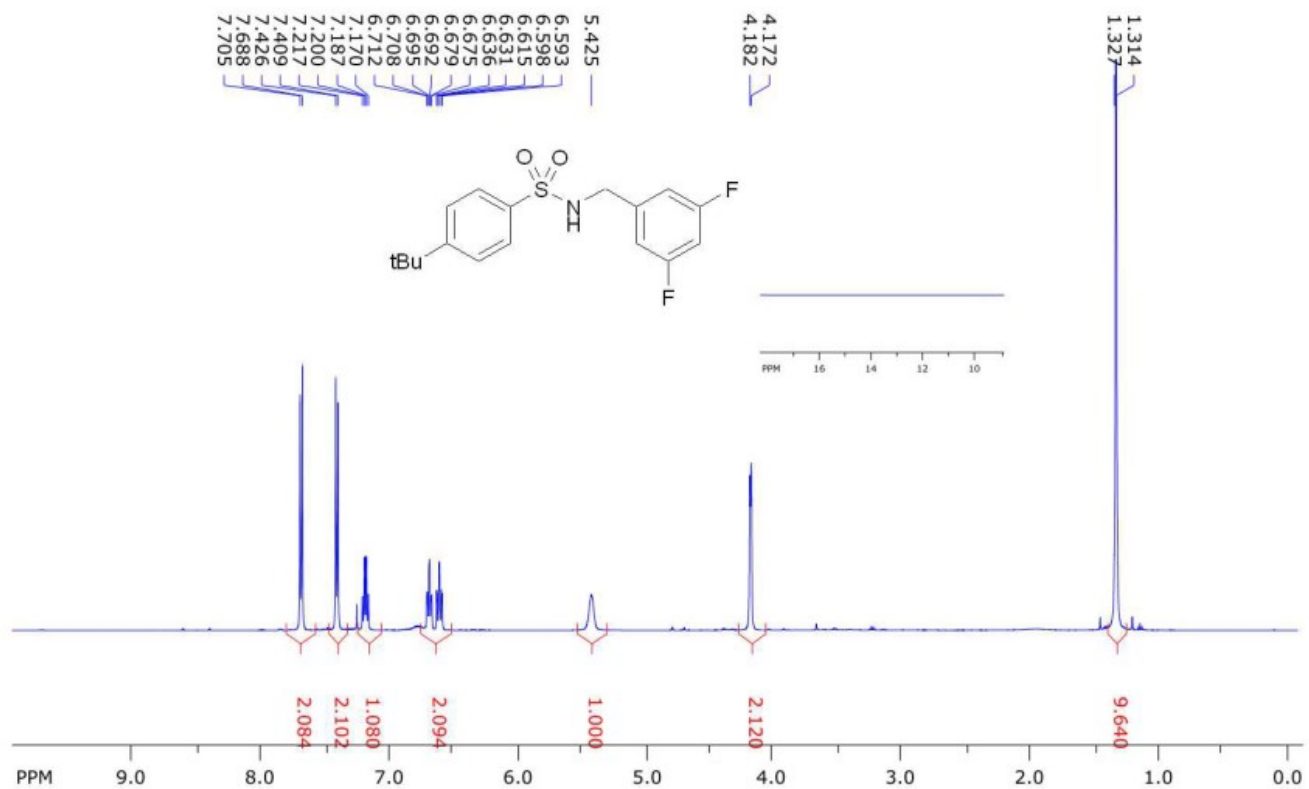

file: ...APO\NMR\500-2\mkr12606\13 3014\fid expt: <zg30>  
transmitter freq.: 500.133001 MHz  
time domain size: 65536 points  
width: 12335.53 Hz = 24.6645 ppm = 0.188225 Hz/pt  
number of scans: 24

freq. of 0 ppm: 500.130023 MHz  
processed size: 65536 complex points  
LB: 0.300 GF: 0.0000  
Hz/cm: 201.512 ppm/cm: 0.40292

**Compound 4h**

SpinWorks 4: IVA 3014 13C CDCl3

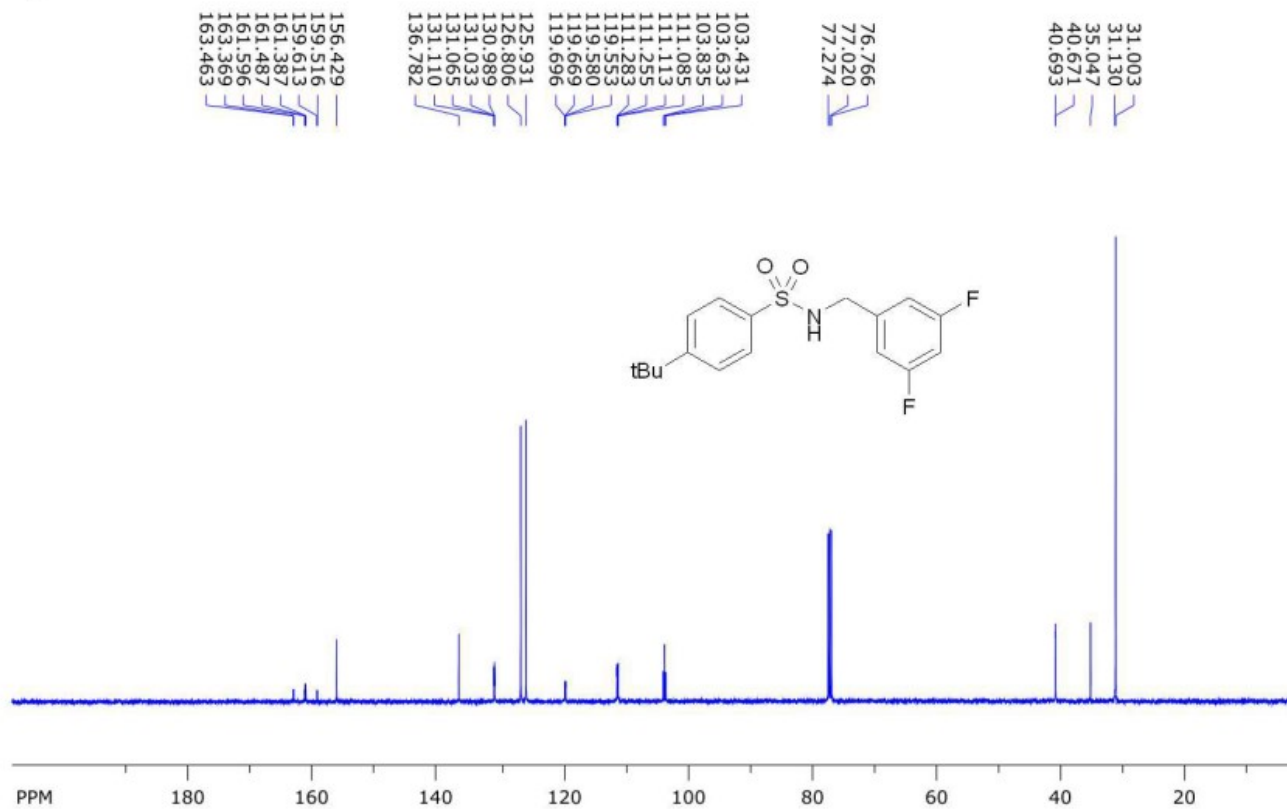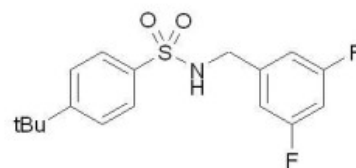

file: D:\NAPO\NMR\500-2\mkr12606\14\fid expt: <zggp30>  
transmitter freq.: 125.772879 MHz  
time domain size: 65536 points  
width: 36057.69 Hz = 286.6889 ppm = 0.550197 Hz/pt  
number of scans: 512

freq. of 0 ppm: 125.757797 MHz  
processed size: 32768 complex points  
LB: 2.000 GF: 0.0000  
Hz/cm: 1041.844 ppm/cm: 8.28353

**Compound 4i**

SpinWorks 4: IVA 3043 1H CDCL3

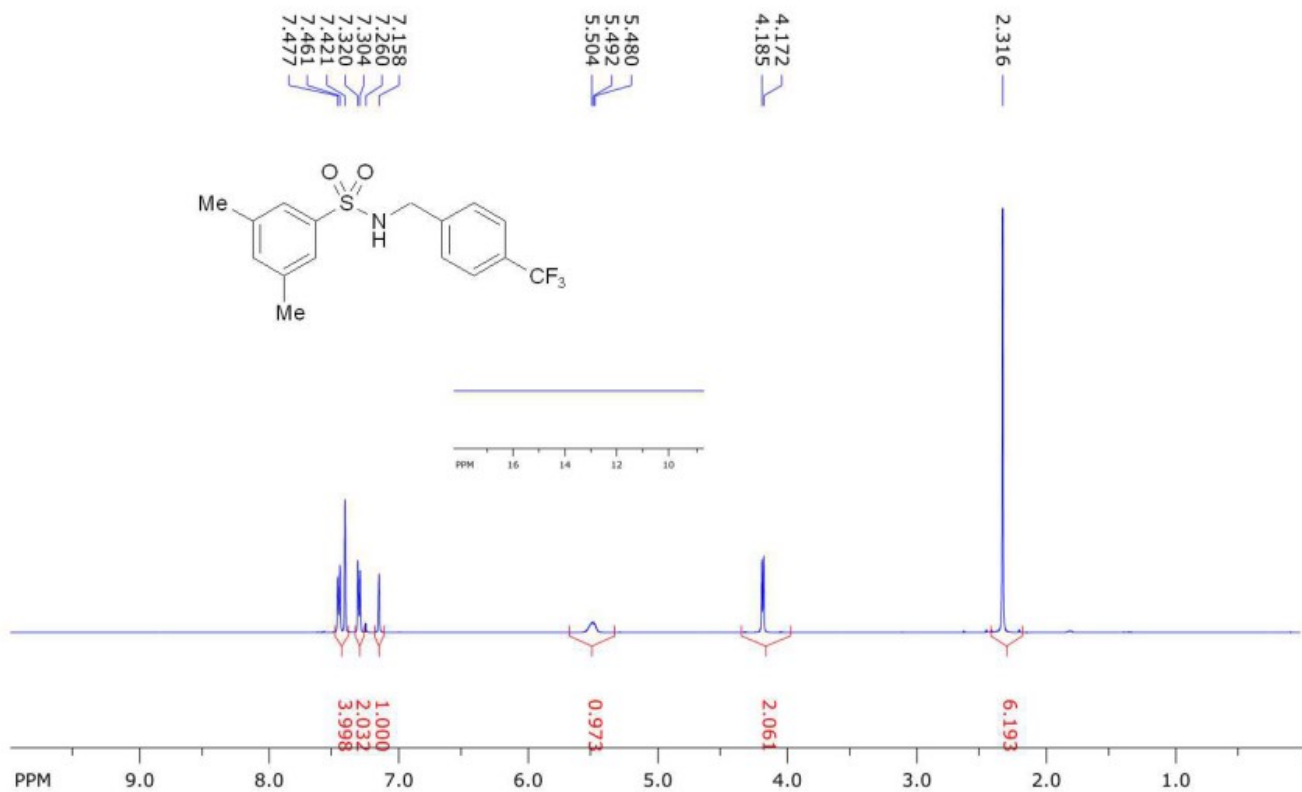

file: ...APO\NMR\500-2\mkr10307\15 3043\fid expt: <zg30>  
transmitter freq.: 500.133001 MHz  
time domain size: 65536 points  
width: 12335.53 Hz = 24.6645 ppm = 0.188225 Hz/pt  
number of scans: 24

freq. of 0 ppm: 500.130023 MHz  
processed size: 65536 complex points  
LB: 0.300 GF: 0.0000  
Hz/cm: 200.316 ppm/cm: 0.40053

**Compound 4i**

SpinWorks 4: IVA 3043 13C CDCL3

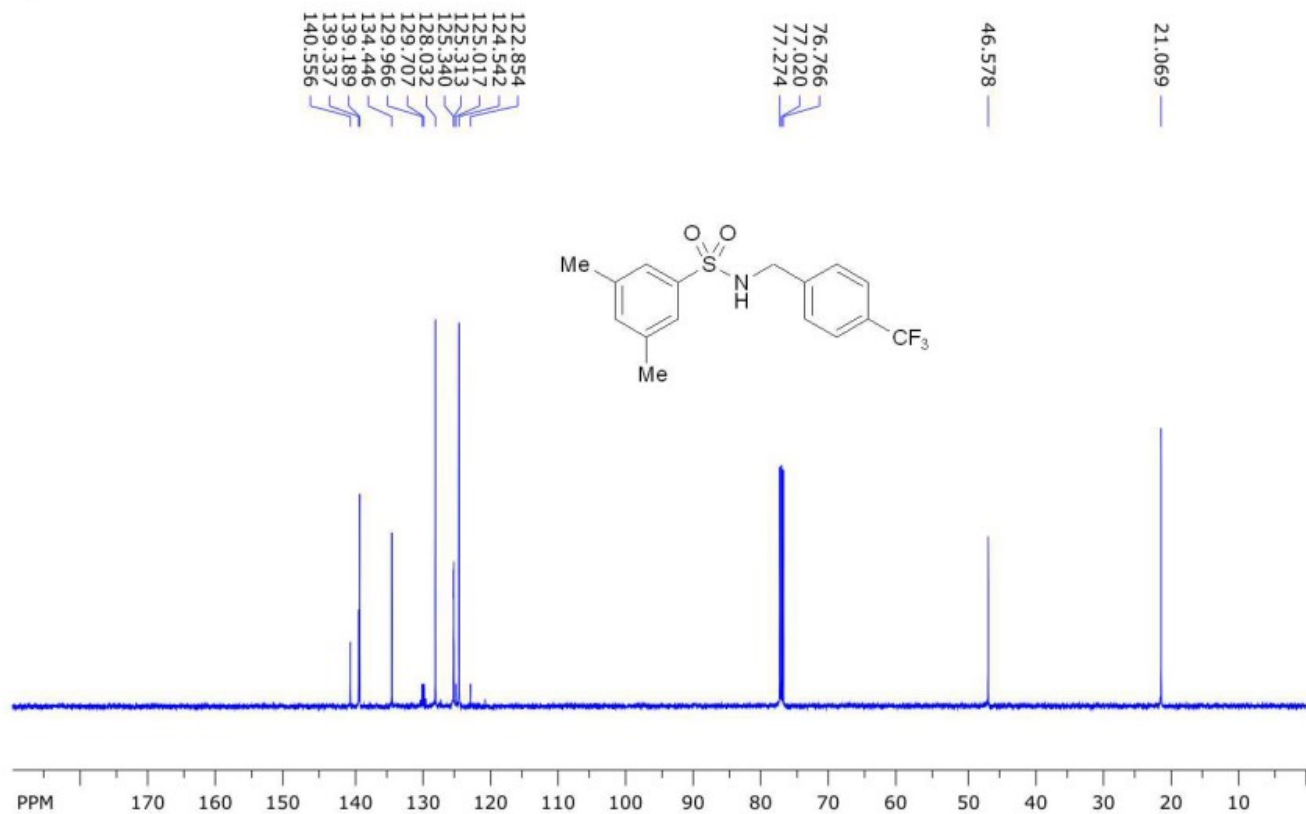

file: D:\NAPO\NMR\500-2\mkr10307\16\fid expt: <zgpg30>  
transmitter freq.: 125.772879 MHz  
time domain size: 65536 points  
width: 36057.69 Hz = 286.6889 ppm = 0.550197 Hz/pt  
number of scans: 512

freq. of 0 ppm: 125.757797 MHz  
processed size: 32768 complex points  
LB: 2.000 GF: 0.0000  
Hz/cm: 958.879 ppm/cm: 7.62390

**Compound 4j**

SpinWorks 4: IVA 2977 1H CDCI3

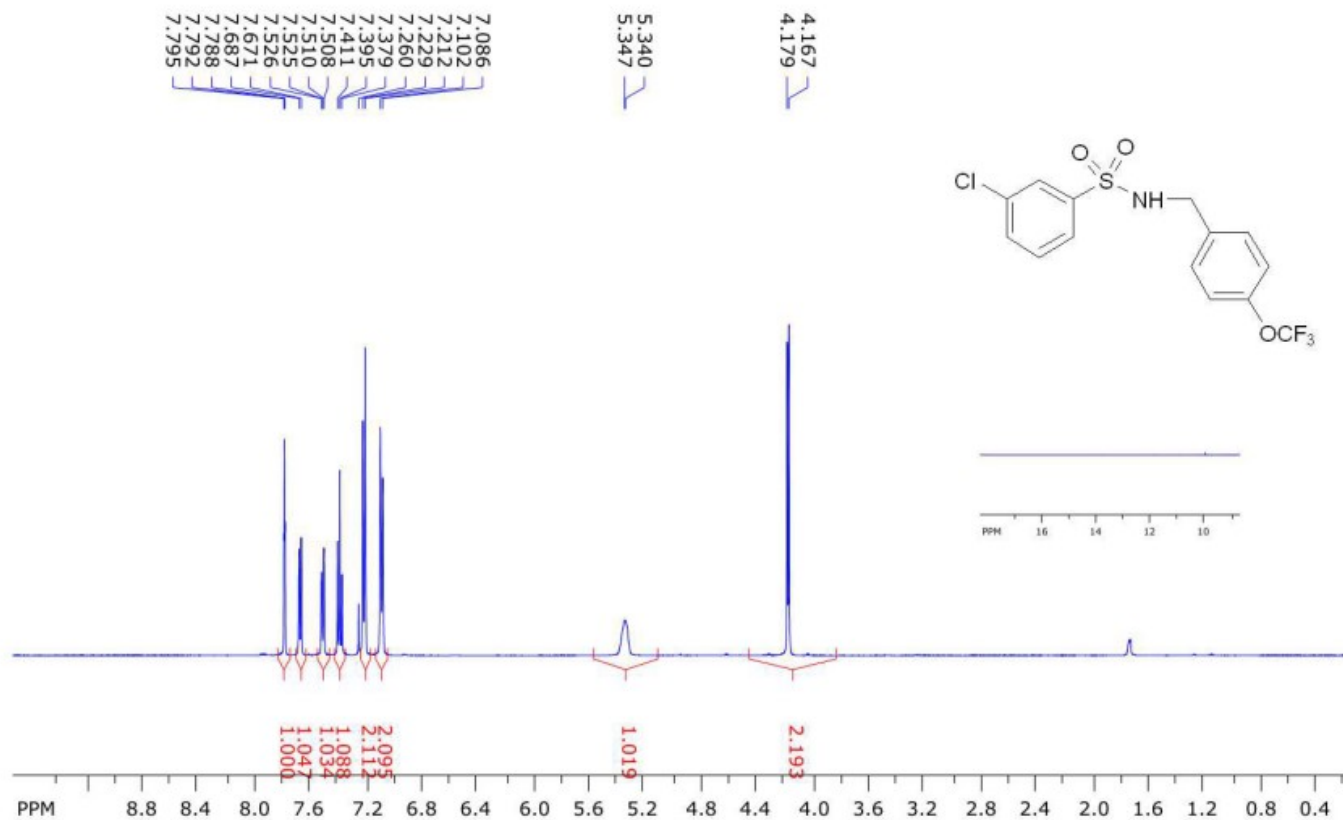

file: ...APO\NMR\500-2\mkr11306\27 2977\fid expt: <zg30>  
transmitter freq.: 500.133001 MHz  
time domain size: 65536 points  
width: 12335.53 Hz = 24.6645 ppm = 0.188225 Hz/pt  
number of scans: 24

freq. of 0 ppm: 500.130023 MHz  
processed size: 65536 complex points  
LB: 0.300 GF: 0.0000  
Hz/cm: 192.674 ppm/cm: 0.38525

**Compound 4j**

SpinWorks 4: IVA 2977 13C CDCl3

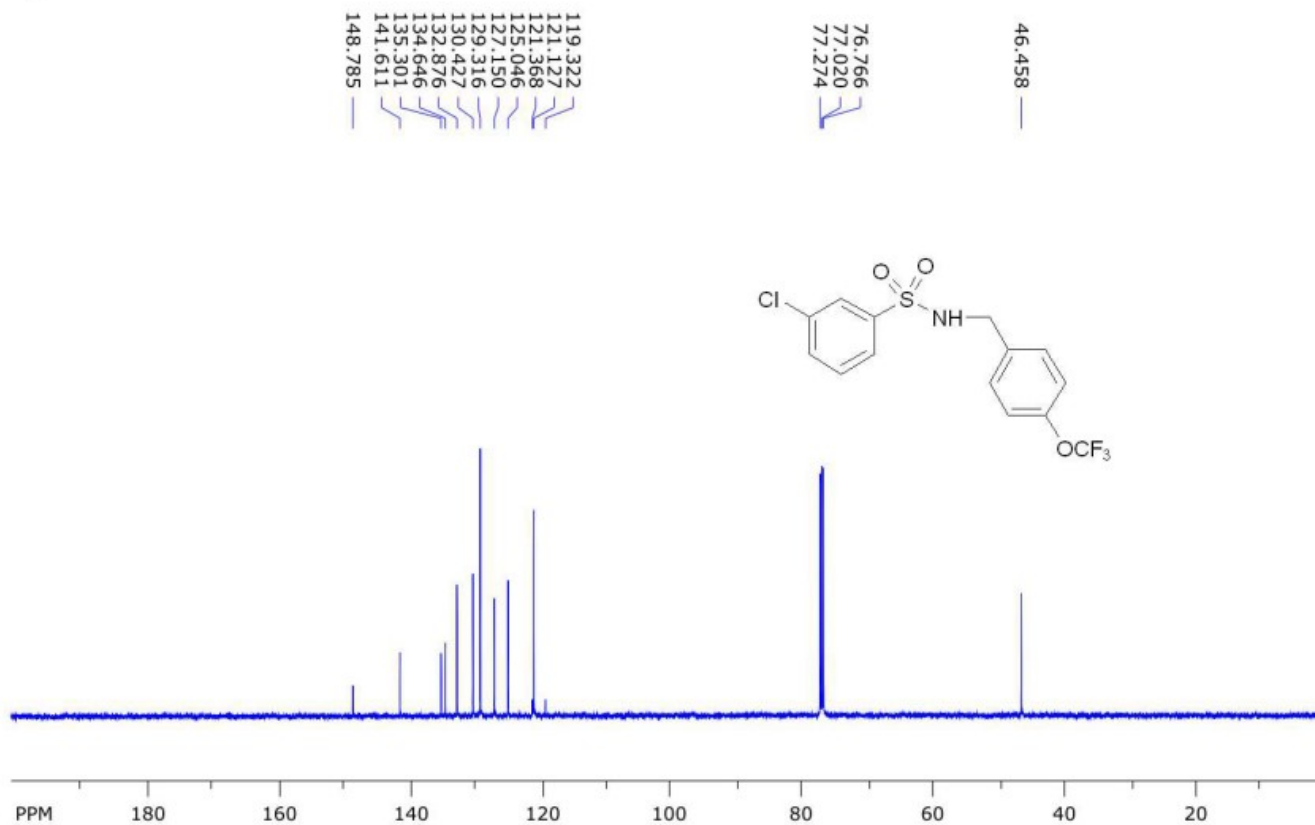

file: D:\NAPO\NMR\500-2\mkr11306\28\fid expt: <zpgg30>  
transmitter freq.: 125.772879 MHz  
time domain size: 65536 points  
width: 36057.69 Hz = 286.6889 ppm = 0.550197 Hz/pt  
number of scans: 512

freq. of 0 ppm: 125.757794 MHz  
processed size: 32768 complex points  
LB: 2.000 GF: 0.0000  
Hz/cm: 1009.934 ppm/cm: 8.02983

**Compound 4k**

SpinWorks 4: IVA 2993 1H CDCl3

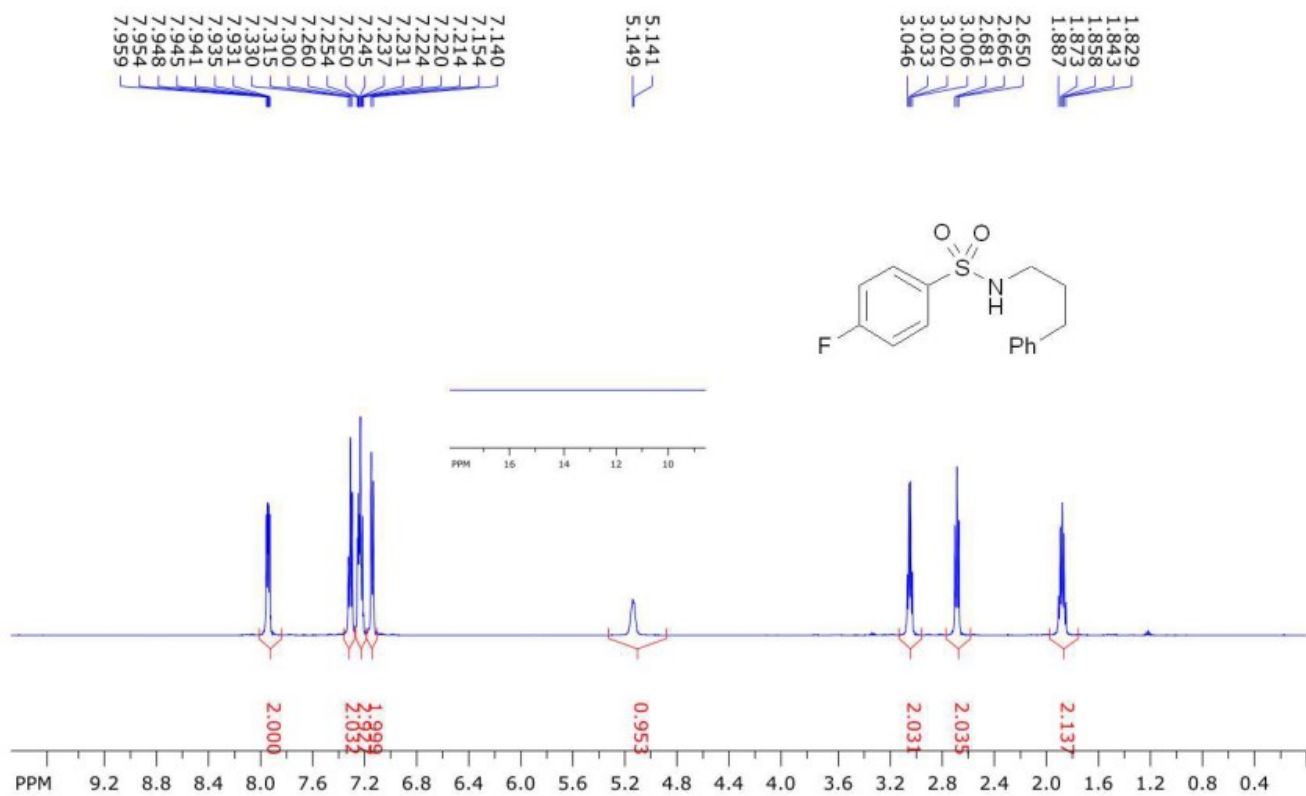

file: ...NAPO\NMR\500-2\mkr12606\7 2993\fid exp: <zg30>  
transmitter freq.: 500.133001 MHz  
time domain size: 65536 points  
width: 12335.53 Hz = 24.6645 ppm = 0.188225 Hz/pt  
number of scans: 24

freq. of 0 ppm: 500.129992 MHz  
processed size: 65536 complex points  
LB: 0.300 GF: 0.0000  
Hz/cm: 198.678 ppm/cm: 0.39725

**Compound 4k**



SpinWorks 4: IVA 2993 13C CDCl3

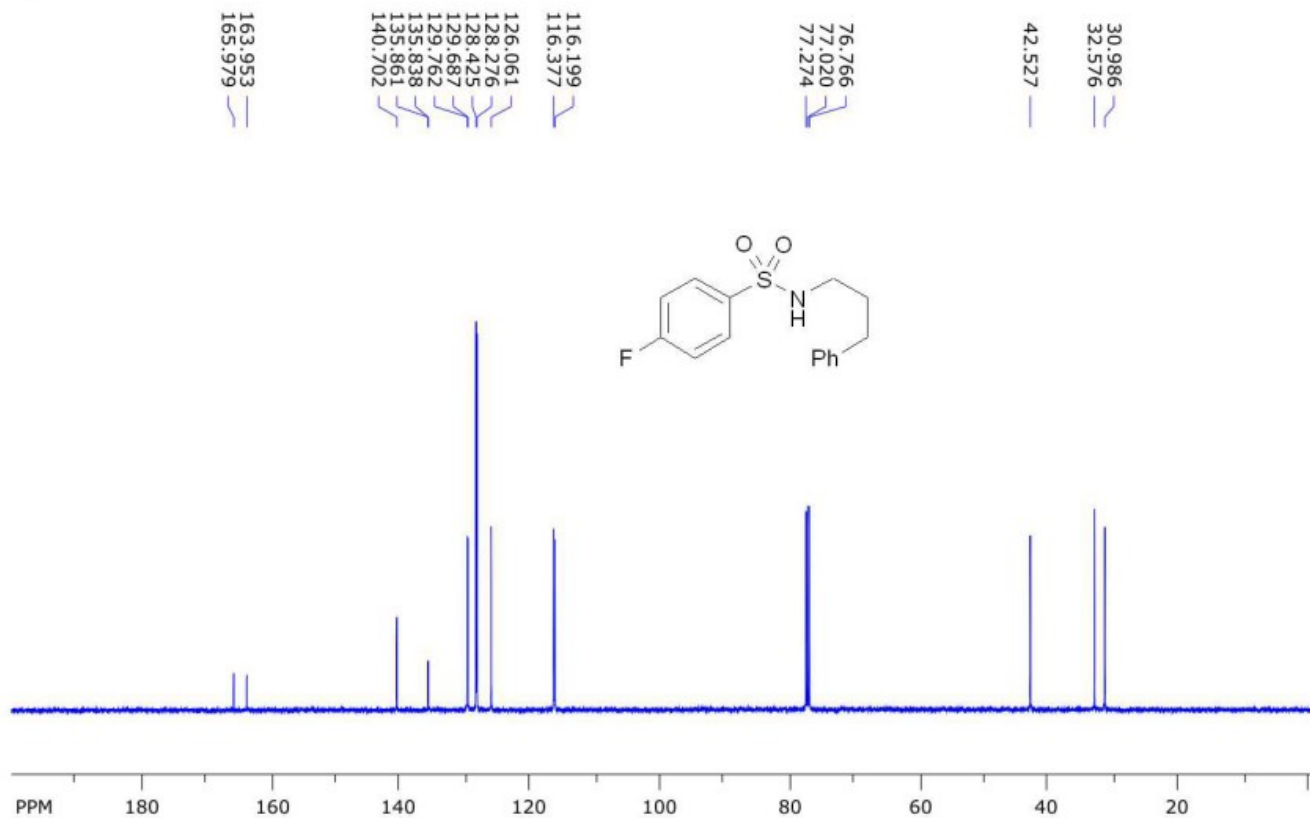

file: D:\NAPO\NMR\500-2\mkr12606\8\fid expt: <zgpg30>  
transmitter freq.: 125.772879 MHz  
time domain size: 65536 points  
width: 36057.69 Hz = 286.6889 ppm = 0.550197 Hz/pt  
number of scans: 512

freq. of 0 ppm: 125.757801 MHz  
processed size: 32768 complex points  
LB: 2.000 GF: 0.0000  
Hz/cm: 1014.721 ppm/cm: 8.06788

**Compound 4I**

SpinWorks 4: IVA 3003 1H CDCl3

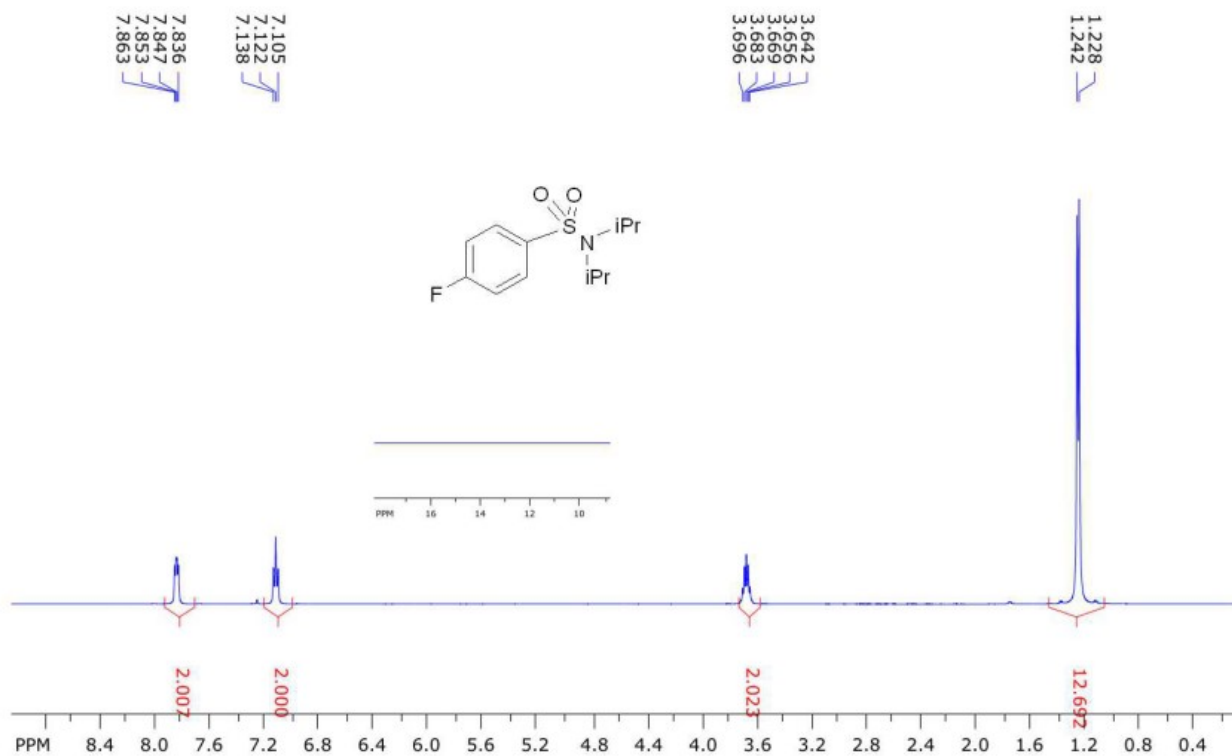

file: ...APO\NMR\500-2\mkr12606\27 3003\fid expt: <zg30>  
transmitter freq.: 500.133001 MHz  
time domain size: 65536 points  
width: 12335.53 Hz = 24.6645 ppm = 0.188225 Hz/pt  
number of scans: 24

freq. of 0 ppm: 500.130024 MHz  
processed size: 65536 complex points  
LB: 0.300 GF: 0.0000  
Hz/cm: 180.666 ppm/cm: 0.36124

**Compound 4I**

SpinWorks 4: IVA 3003 13C CDCI3

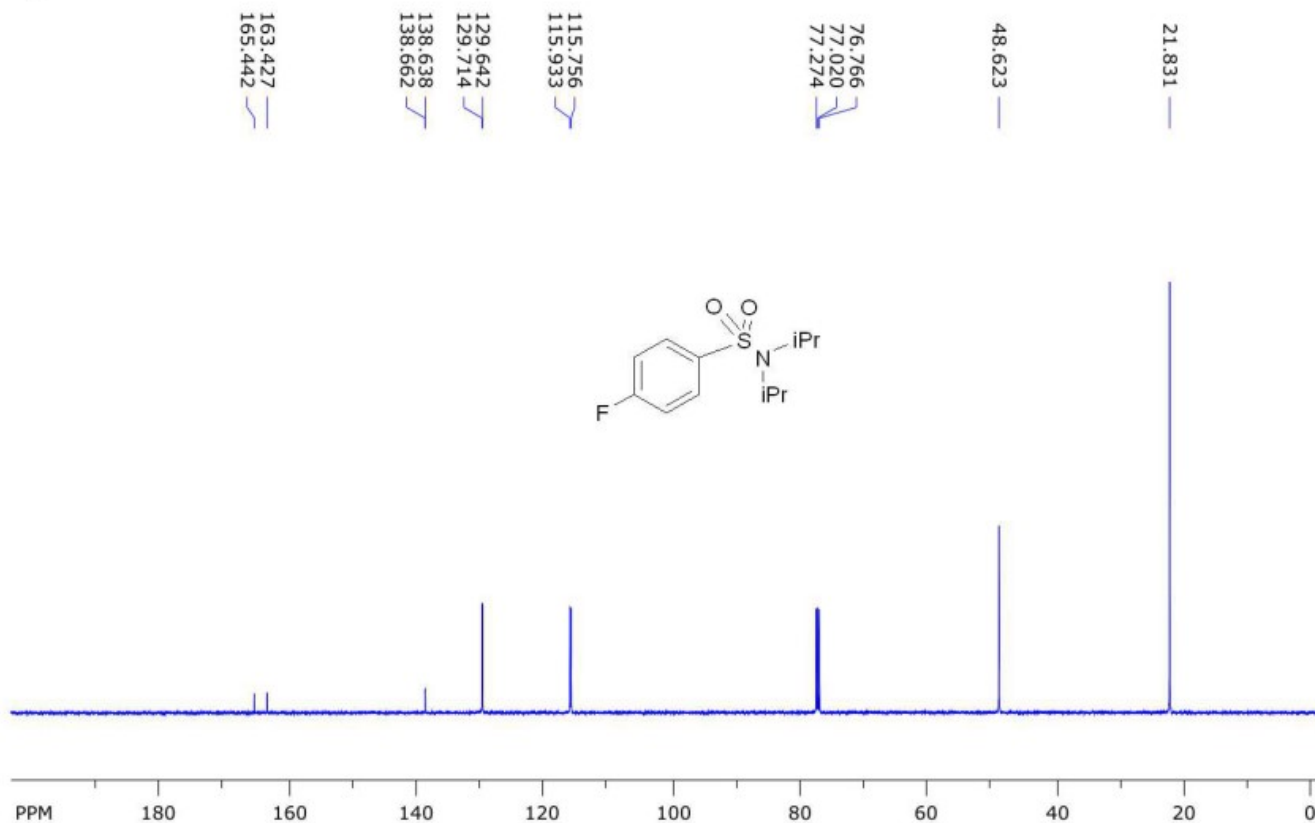

file: D:\NAPO\NMR\500-2\mkr12606\28\fid expt: <zggg30>  
transmitter freq.: 125.772879 MHz  
time domain size: 65536 points  
width: 36057.69 Hz = 286.6889 ppm = 0.550197 Hz/pt  
number of scans: 512

freq. of 0 ppm: 125.757798 MHz  
processed size: 32768 complex points  
LB: 2.000 GF: 0.0000  
Hz/cm: 1033.867 ppm/cm: 8.22011

**Compound 4m**

SpinWorks 4: IVA 2989 1H CDCI3

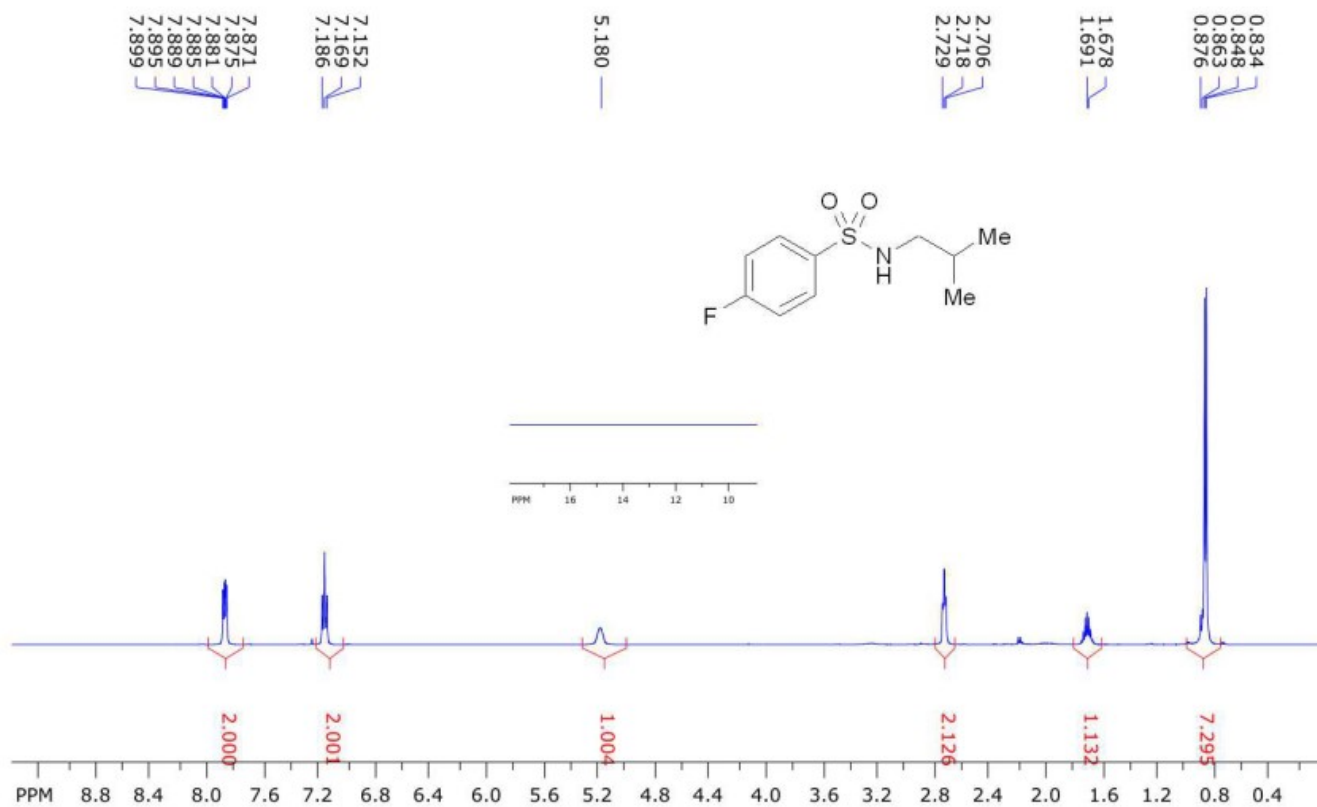

file: ...APO\NMR\500-2\mkr11306\23 2989\fid expt: <zg30>  
transmitter freq.: 500.133001 MHz  
time domain size: 65536 points  
width: 12335.53 Hz = 24.6645 ppm = 0.188225 Hz/pt  
number of scans: 24

freq. of 0 ppm: 500.130024 MHz  
processed size: 65536 complex points  
LB: 0.300 GF: 0.0000  
Hz/cm: 188.854 ppm/cm: 0.37761

**Compound 4m**

SpinWorks 4: IVA 2989 13C CDCI3

163.897  
165.920

129.648  
129.723  
136.052  
136.075

116.140  
116.320

76.765  
77.020  
77.274

50.494

28.347

19.783

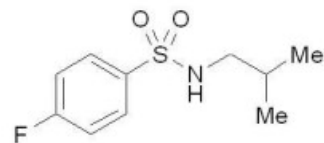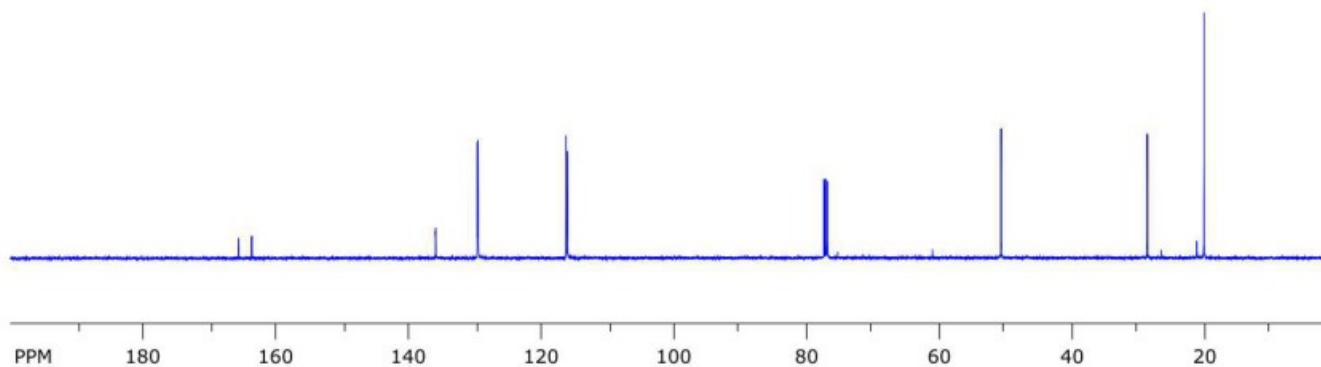

file: D:\NAPO\NMR\500-2\mkr11306\24\fid exp: <zpgg30>  
transmitter freq.: 125.772879 MHz  
time domain size: 65536 points  
width: 36057.69 Hz = 286.6889 ppm = 0.550197 Hz/pt  
number of scans: 512

freq. of 0 ppm: 125.757797 MHz  
processed size: 32768 complex points  
LB: 2.000 GF: 0.0000  
Hz/cm: 1006.744 ppm/cm: 8.00446

**Compound 4n**

SpinWorks 4: IVA 2978 1H CDCl3

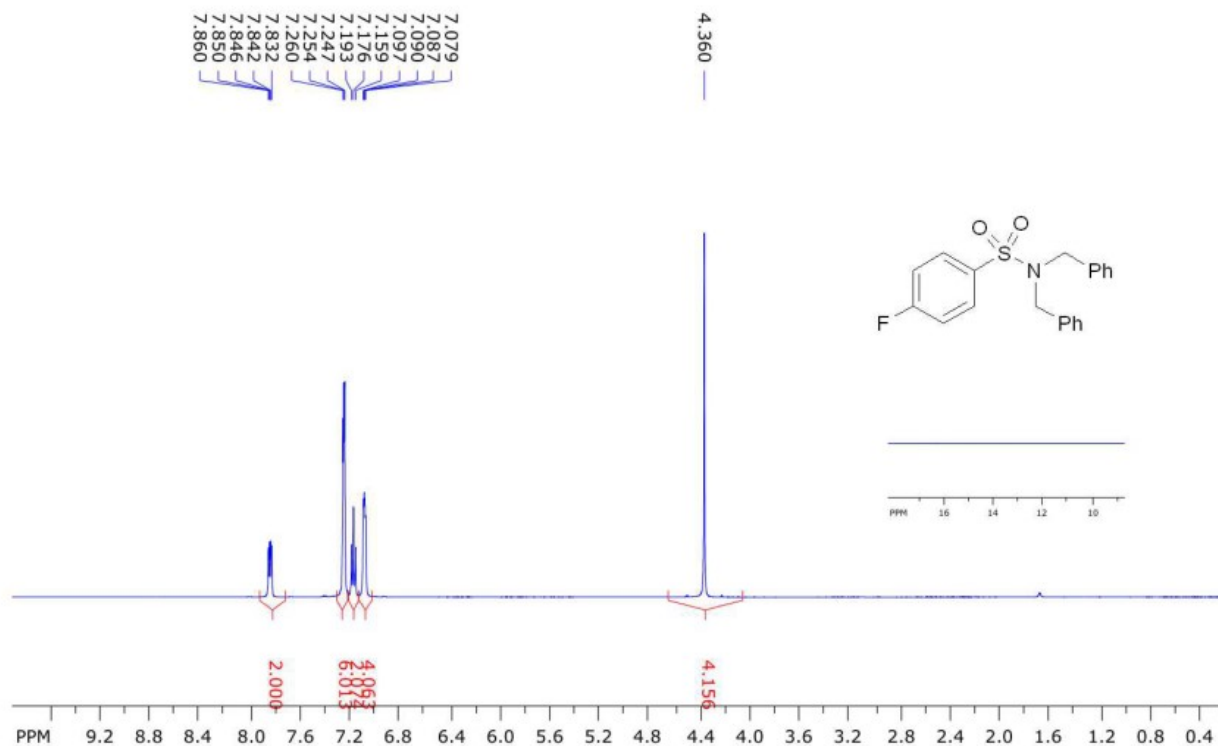

file: ...APO\NMR\500-2\mkr11406\13 2978\fid exp: <zg30>  
transmitter freq.: 500.133001 MHz  
time domain size: 65536 points  
width: 12335.53 Hz = 24.6645 ppm = 0.188225 Hz/pt  
number of scans: 24

freq. of 0 ppm: 500.130019 MHz  
processed size: 65536 complex points  
LB: 0.300 GF: 0.0000  
Hz/cm: 195.403 ppm/cm: 0.39070

**Compound 4n**

SpinWorks 4: IVA 2978 13C CDCl3

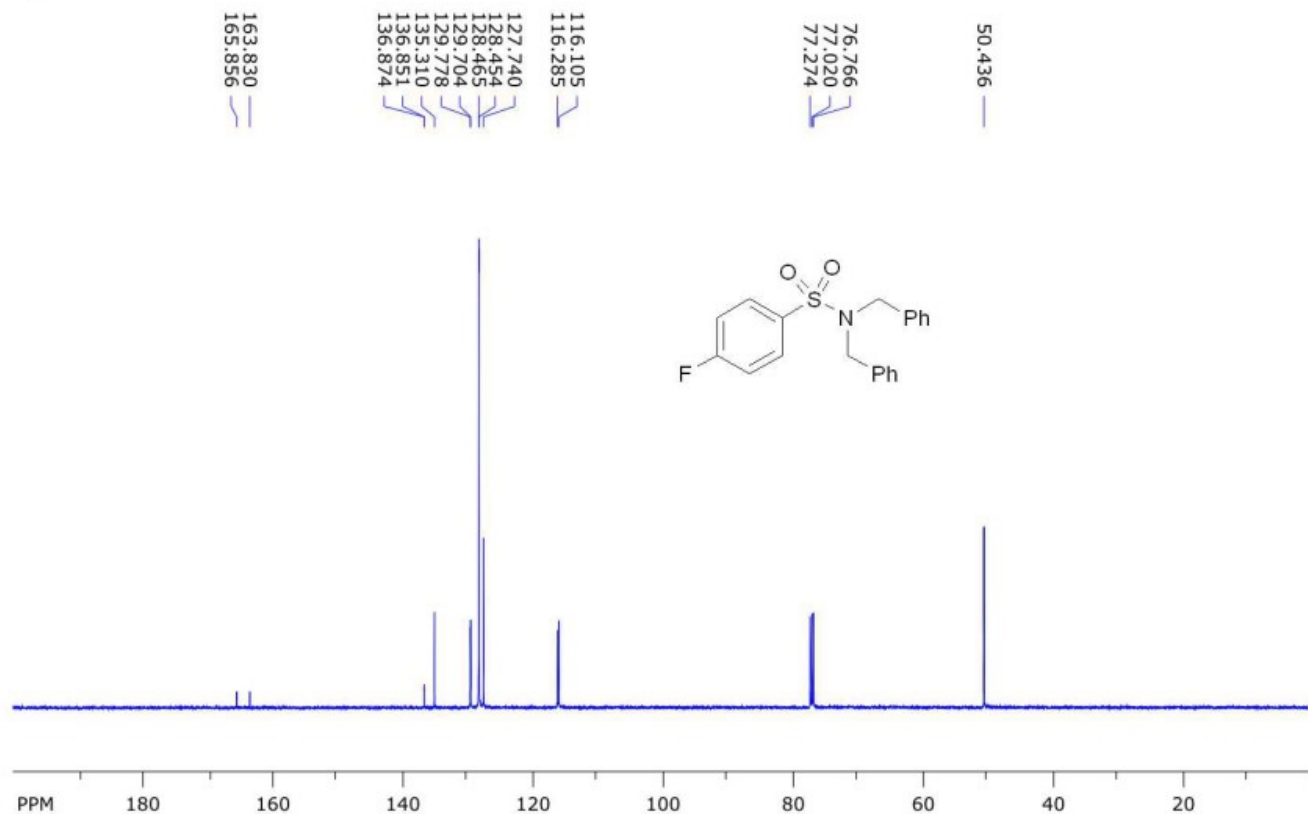

file: D:\NAPO\NMR\500-2\mkr11406\14\fid expt: <zggp30>  
transmitter freq.: 125.772879 MHz  
time domain size: 65536 points  
width: 36057.69 Hz = 286.6889 ppm = 0.550197 Hz/pt  
number of scans: 512

freq. of 0 ppm: 125.757802 MHz  
processed size: 32768 complex points  
LB: 2.000 GF: 0.0000  
Hz/cm: 1006.744 ppm/cm: 8.00446

**Compound 4o**

SpinWorks 4: IVA 2975 1H CDL3

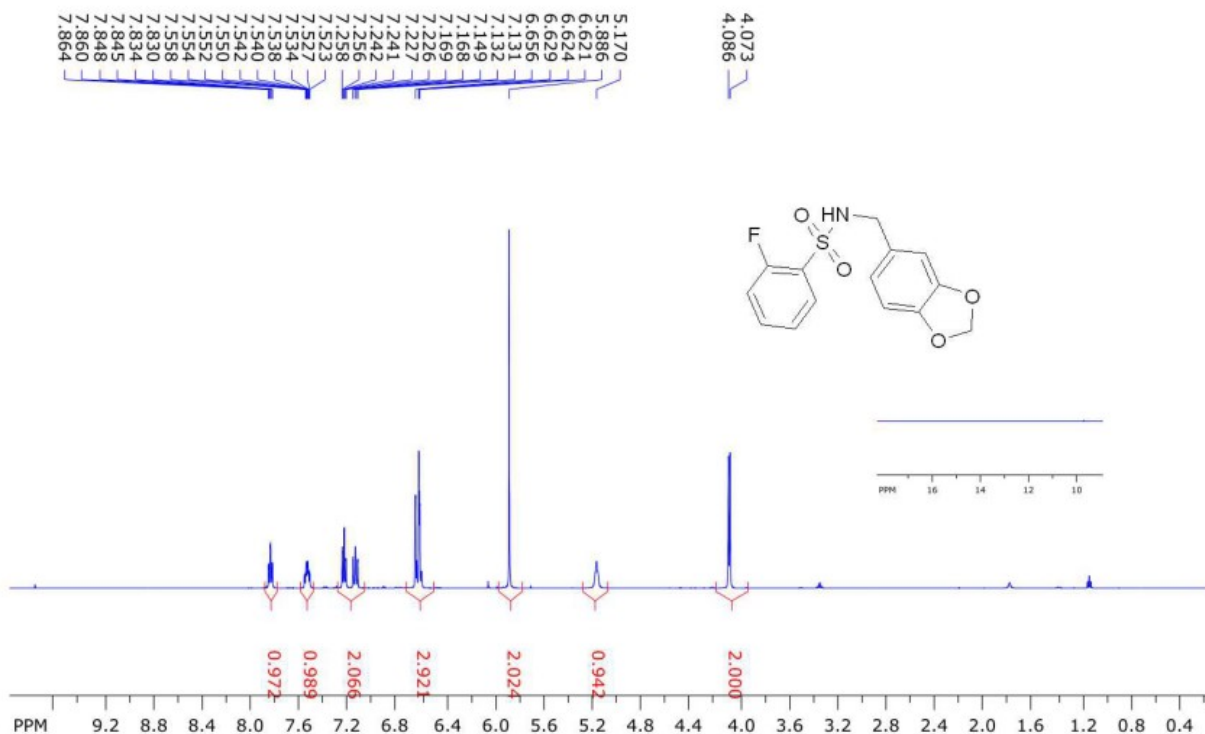

file: ...NAPO\NMR\500-2\mkr12606\9 2975\fid exp: <zg30>  
 transmitter freq.: 500.133001 MHz  
 time domain size: 65536 points  
 width: 12335.53 Hz = 24.6645 ppm = 0.188225 Hz/pt  
 number of scans: 24

freq. of 0 ppm: 500.130024 MHz  
 processed size: 65536 complex points  
 LB: 0.300 GF: 0.0000  
 Hz/cm: 197.041 ppm/cm: 0.39398



## Compound 4o

SpinWorks 4: IVA 2975 13C CDCl3

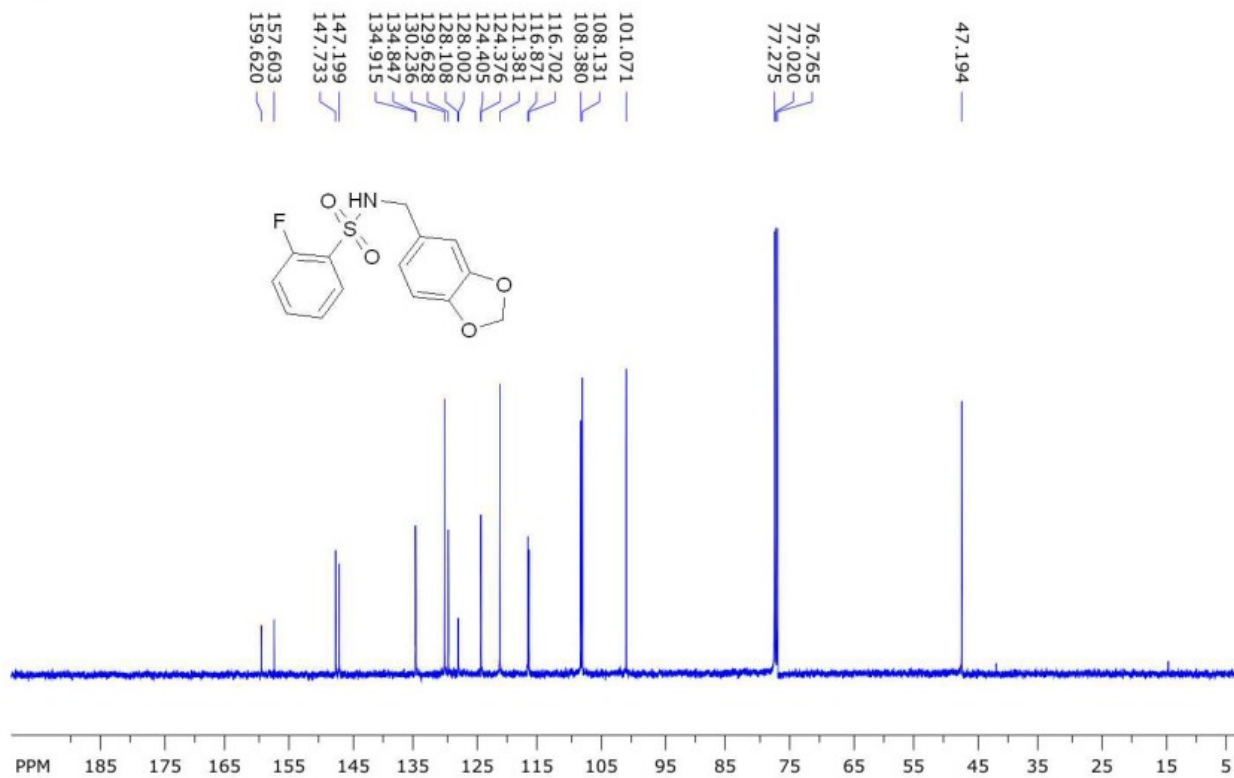

file: D:\NAPO\NMR\500-2\mkr12606\10\fid expt: <zggg30>  
transmitter freq.: 125.772879 MHz  
time domain size: 65536 points  
width: 36057.69 Hz = 286.6889 ppm = 0.550197 Hz/pt  
number of scans: 512

freq. of 0 ppm: 125.757800 MHz  
processed size: 32768 complex points  
LB: 2.000 GF: 0.0000  
Hz/cm: 997.171 ppm/cm: 7.92834

## Compound 4p

SpinWorks 4: IVA 2087 1H CDCL3

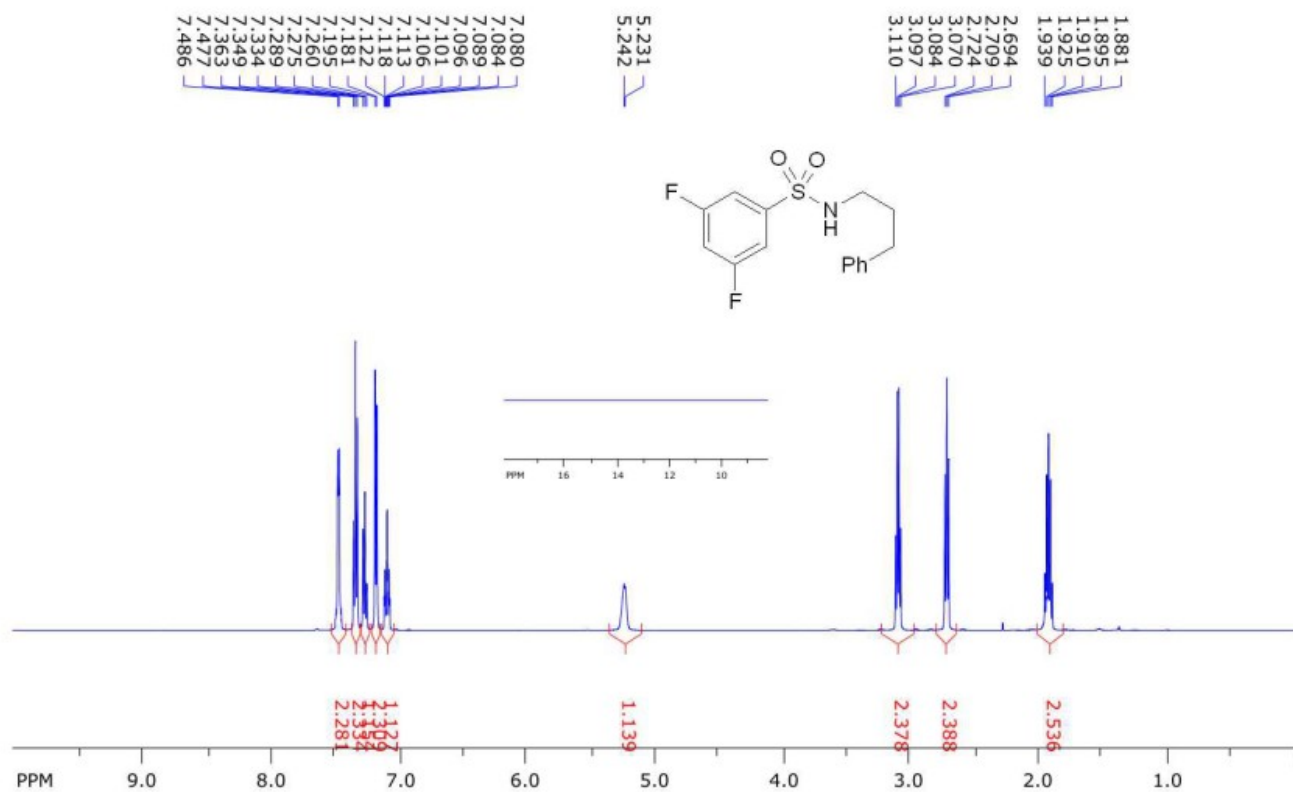

file: ...APO\NMR\500-2\mkr11306\17 2991\fid expt: <zg30>  
transmitter freq.: 500.133001 MHz  
time domain size: 65536 points  
width: 12335.53 Hz = 24.6645 ppm = 0.188225 Hz/pt  
number of scans: 24

freq. of 0 ppm: 500.129984 MHz  
processed size: 65536 complex points  
LB: 0.300 GF: 0.0000  
Hz/cm: 202.499 ppm/cm: 0.40489

**Compound 4p**

SpinWorks 4: IVA 2087 13C CDCl3

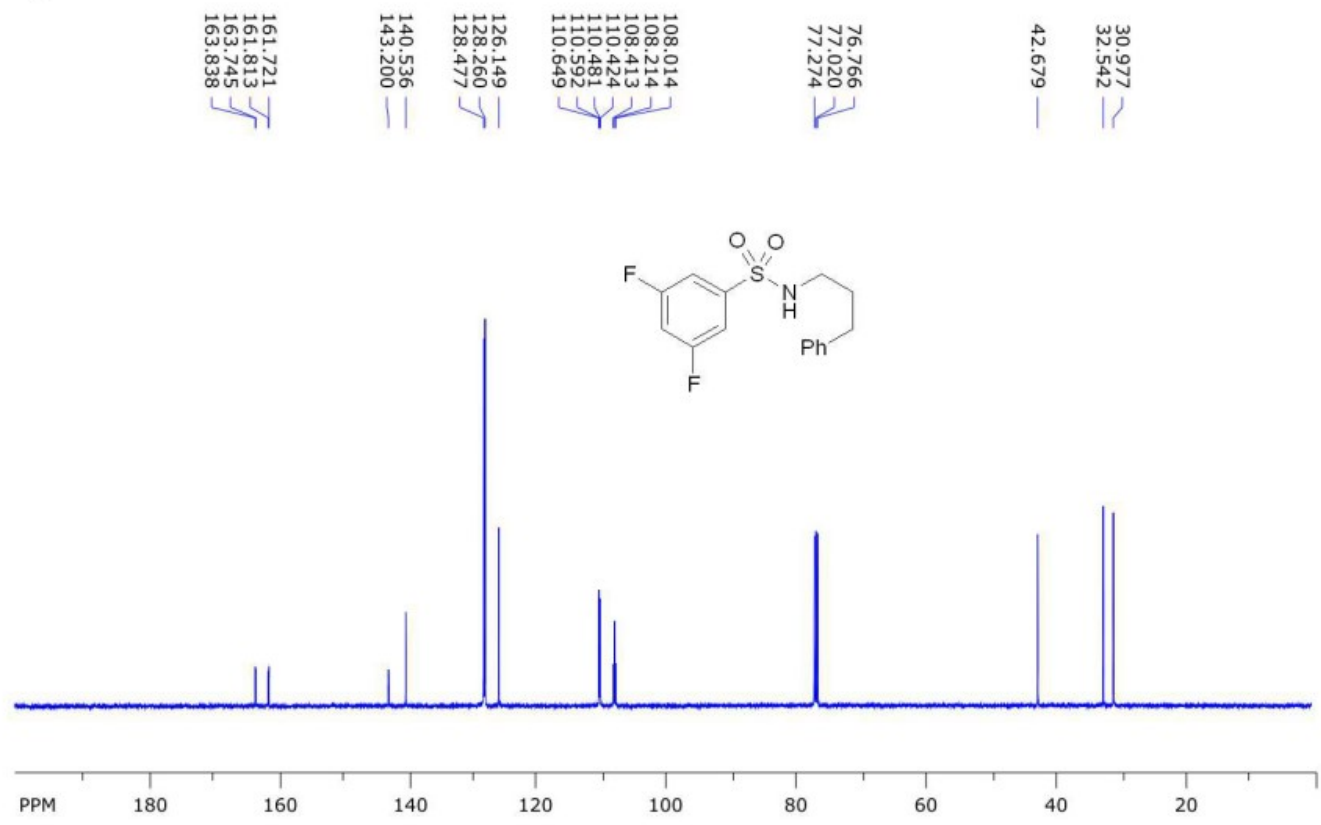

file: D:\NAPO\NMR\500-2\mkr11306\18\fid expt: <zgpg30>  
transmitter freq.: 125.772879 MHz  
time domain size: 65536 points  
width: 36057.69 Hz = 286.6889 ppm = 0.550197 Hz/pt  
number of scans: 512

freq. of 0 ppm: 125.757801 MHz  
processed size: 32768 complex points  
LB: 2.000 GF: 0.0000  
Hz/cm: 1009.934 ppm/cm: 8.02983

**Compound 4q**

SpinWorks 4: IVA 2917 1H

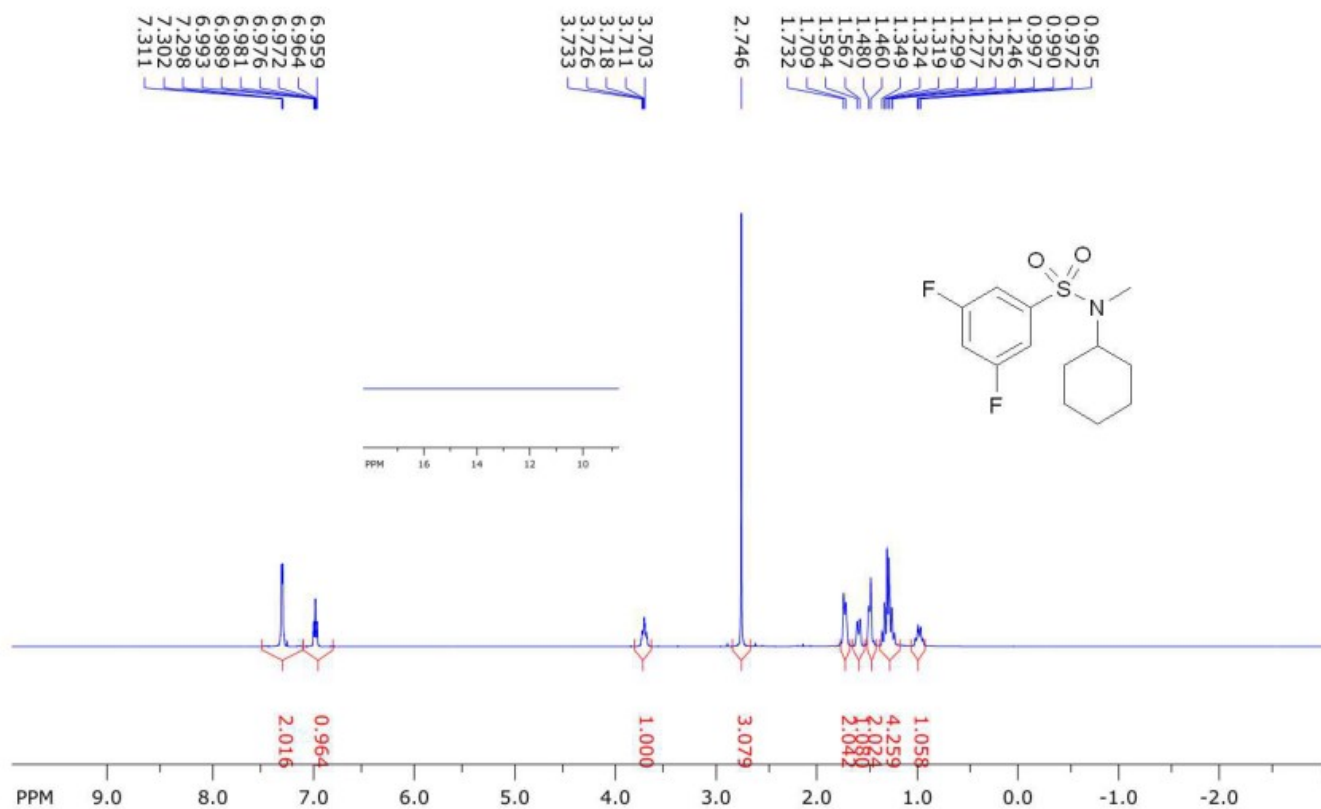

file: ...APO\NMR\500-2\mkr11106\19 2917\fid expt: <zg30>  
transmitter freq.: 500.133001 MHz  
time domain size: 65536 points  
width: 12335.53 Hz = 24.6645 ppm = 0.188225 Hz/pt  
number of scans: 24

freq. of 0 ppm: 500.130023 MHz  
processed size: 65536 complex points  
LB: 0.300 GF: 0.0000  
Hz/cm: 261.993 ppm/cm: 0.52385

Compound 4q

SpinWorks 4: IVA 2917 13C

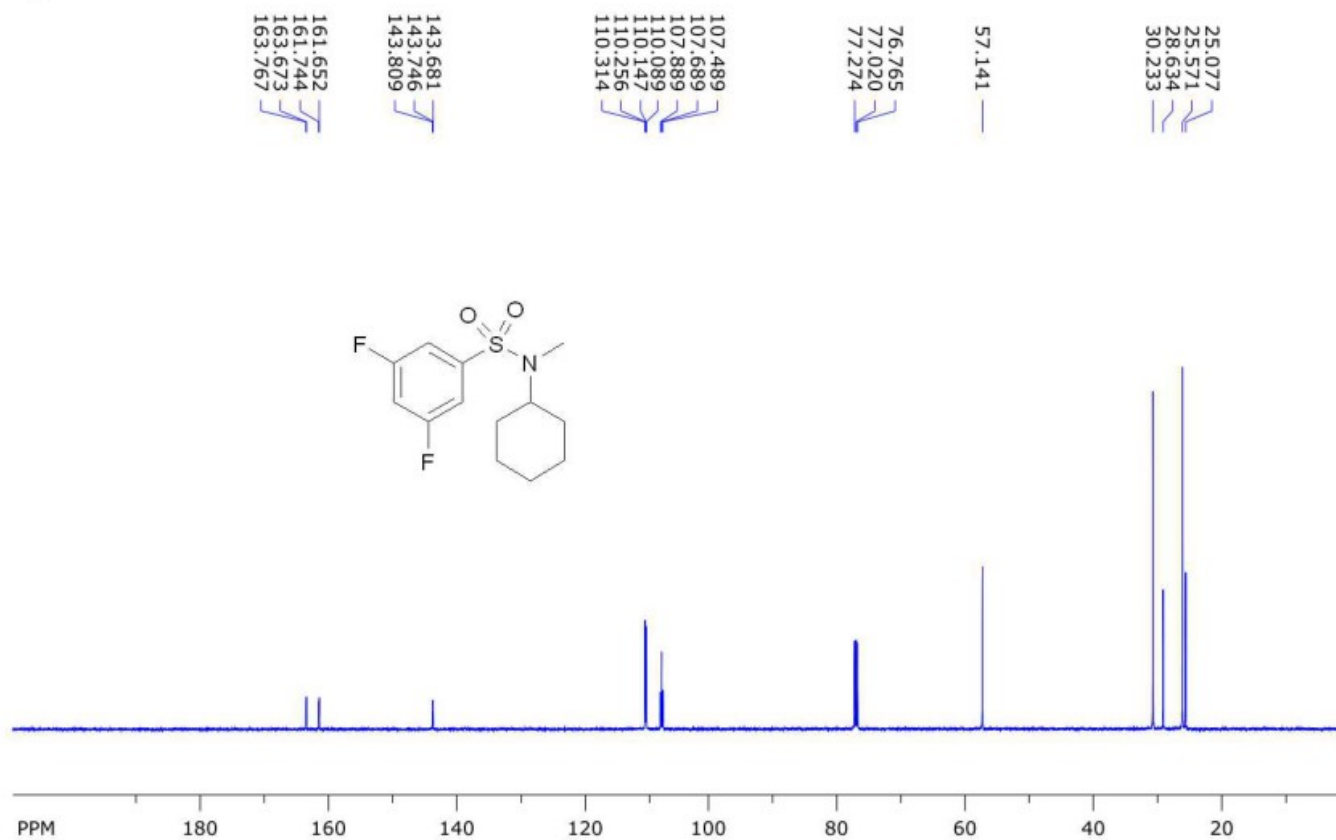

file: D:\NAPO\NMR\500-2\mkr11106\20\fid expt: <zggg30>  
transmitter freq.: 125.772879 MHz  
time domain size: 65536 points  
width: 36057.69 Hz = 286.6889 ppm = 0.550197 Hz/pt  
number of scans: 512

freq. of 0 ppm: 125.757801 MHz  
processed size: 32768 complex points  
LB: 2.000 GF: 0.0000  
Hz/cm: 1056.203 ppm/cm: 8.39770

**Compound 4r**

SpinWorks 4: IVA 2985 1H CDCl3

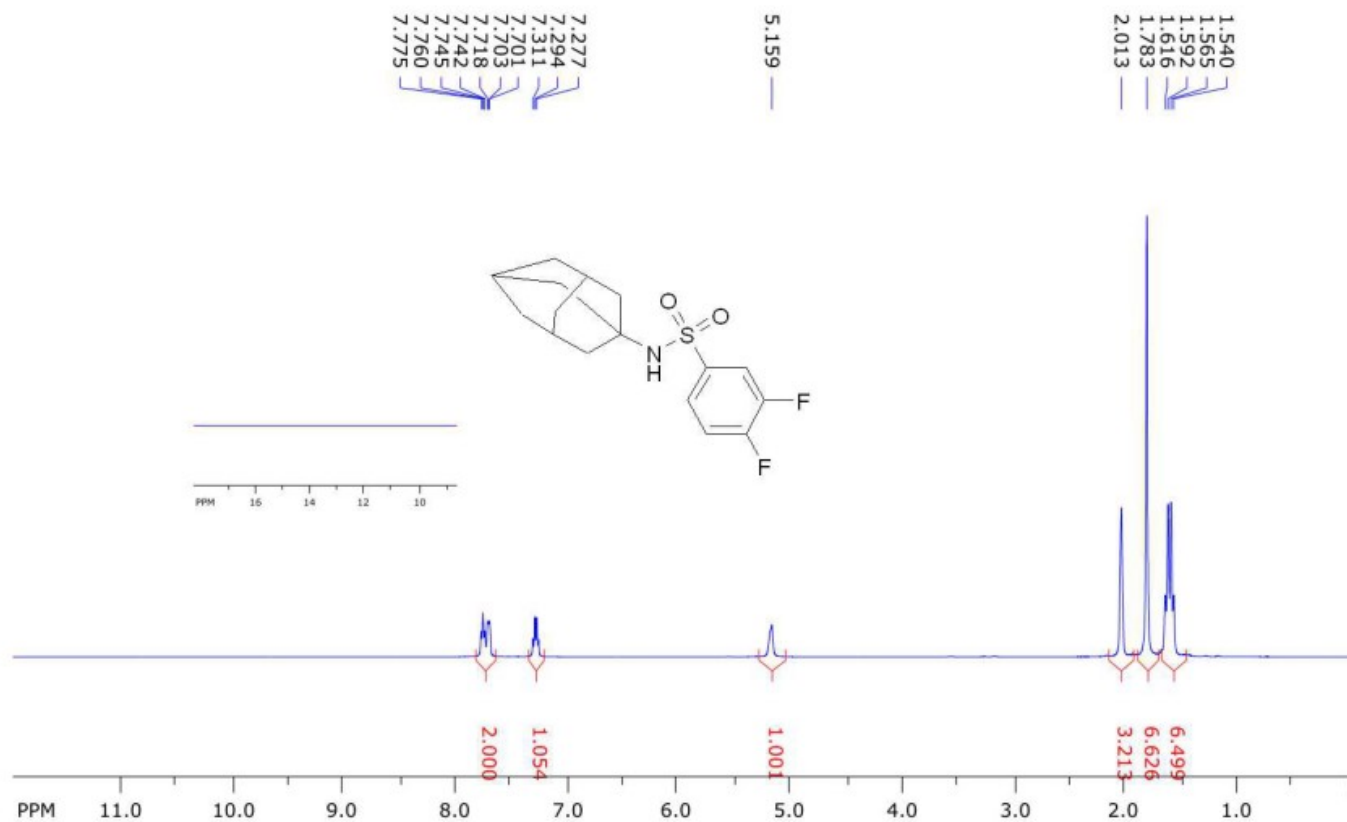

file: ...APO\NMR\500-2\mkr11306\15 2985\fid expt: <zg30>  
transmitter freq.: 500.133001 MHz  
time domain size: 65536 points  
width: 12335.53 Hz = 24.6645 ppm = 0.188225 Hz/pt  
number of scans: 24

freq. of 0 ppm: 500.130018 MHz  
processed size: 65536 complex points  
LB: 0.300 GF: 0.0000  
Hz/cm: 241.798 ppm/cm: 0.48347

**Compound 4r**

SpinWorks 4: IVA 2985 13C CDCl3

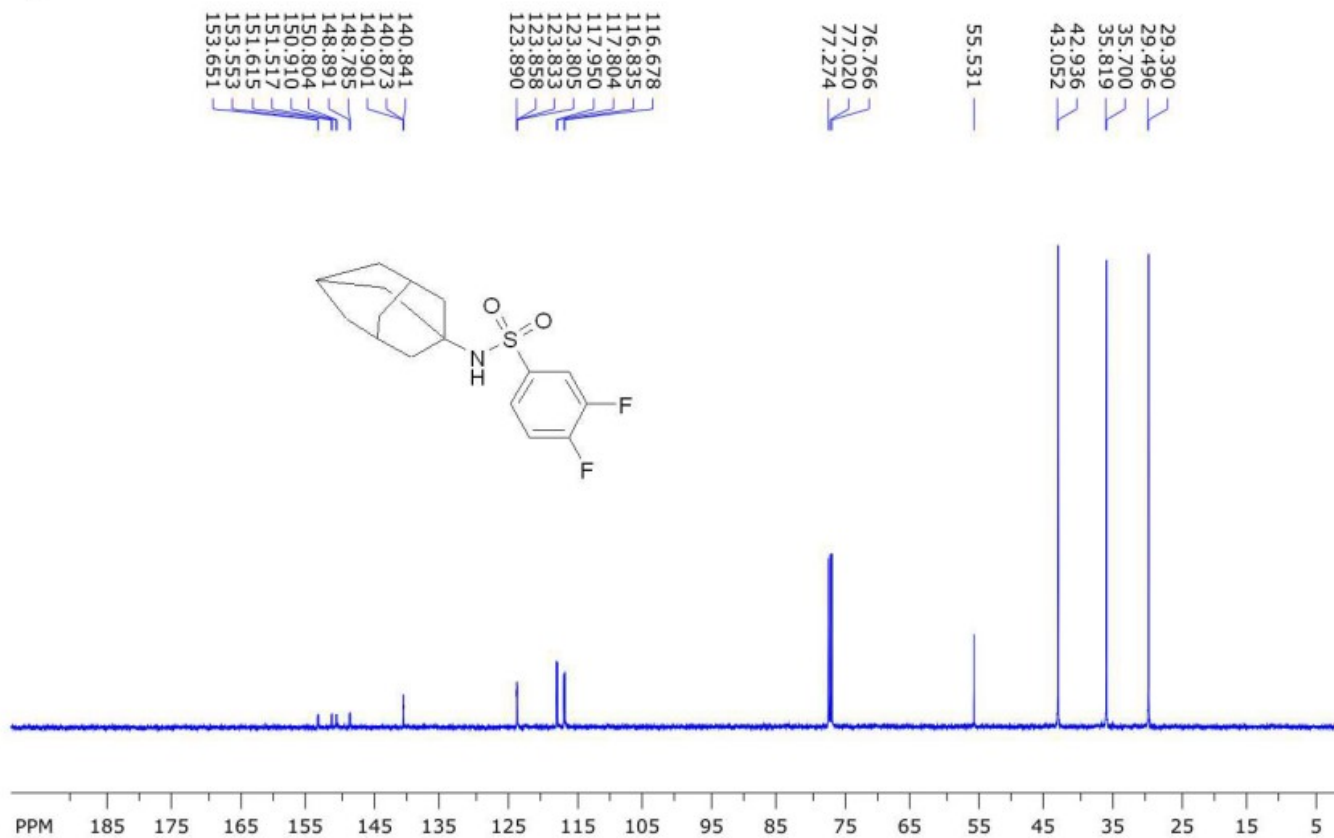

file: D:\NAPO\NMR\500-2\mkr11306\16\fid expt: <zpgg30>  
transmitter freq.: 125.772879 MHz  
time domain size: 65536 points  
width: 36057.69 Hz = 286.6889 ppm = 0.550197 Hz/pt  
number of scans: 512

freq. of 0 ppm: 125.757796 MHz  
processed size: 32768 complex points  
LB: 2.000 GF: 0.0000  
Hz/cm: 1001.957 ppm/cm: 7.96640

**Compound 4s**

SpinWorks 4: IVA 3015 1H CDCl3

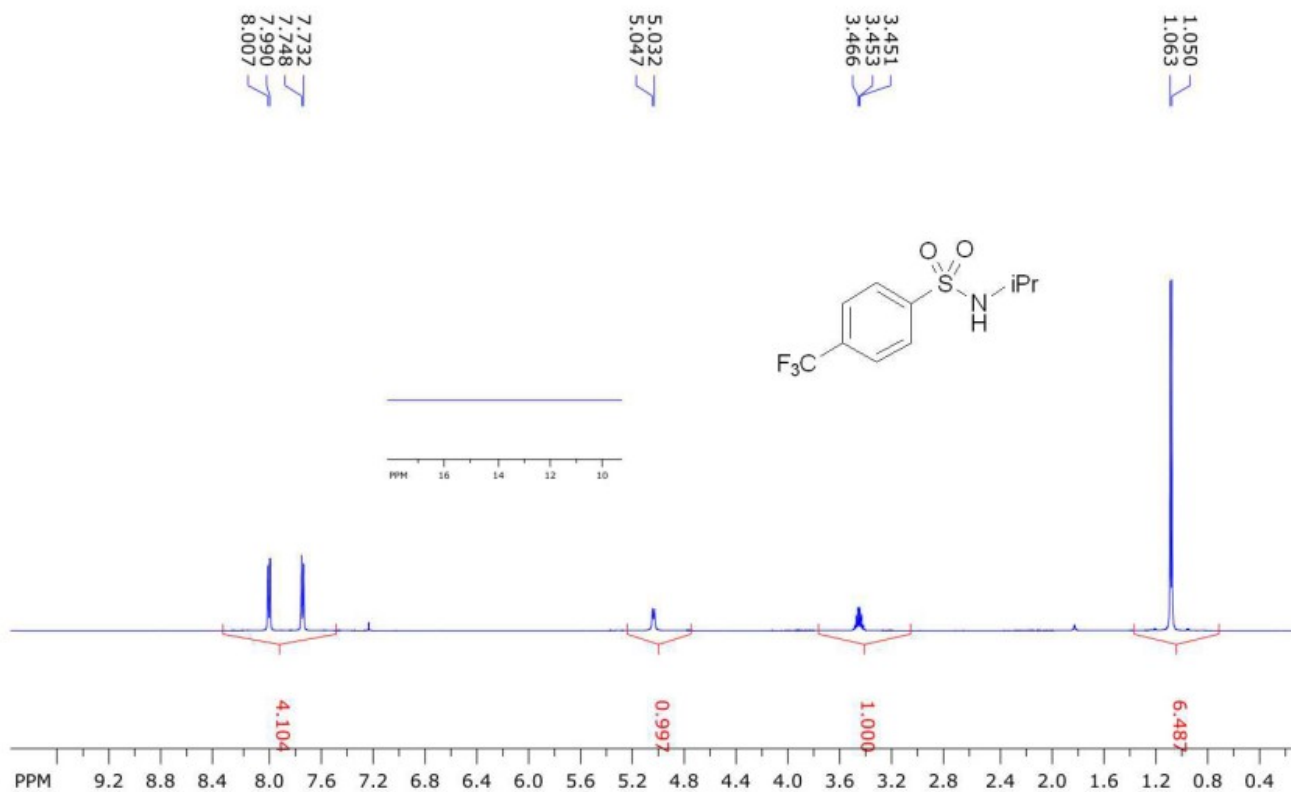

file: ...APO\NMR\500-2\mkr12806\19 3015\fid expt: <zg30>  
transmitter freq.: 500.133001 MHz  
time domain size: 65536 points  
width: 12335.53 Hz = 24.6645 ppm = 0.188225 Hz/pt  
number of scans: 24

freq. of 0 ppm: 500.130038 MHz  
processed size: 65536 complex points  
LB: 0.300 GF: 0.0000  
Hz/cm: 198.678 ppm/cm: 0.39725

**Compound 4s**



SpinWorks 4: IVA 3015 13C CDCl3

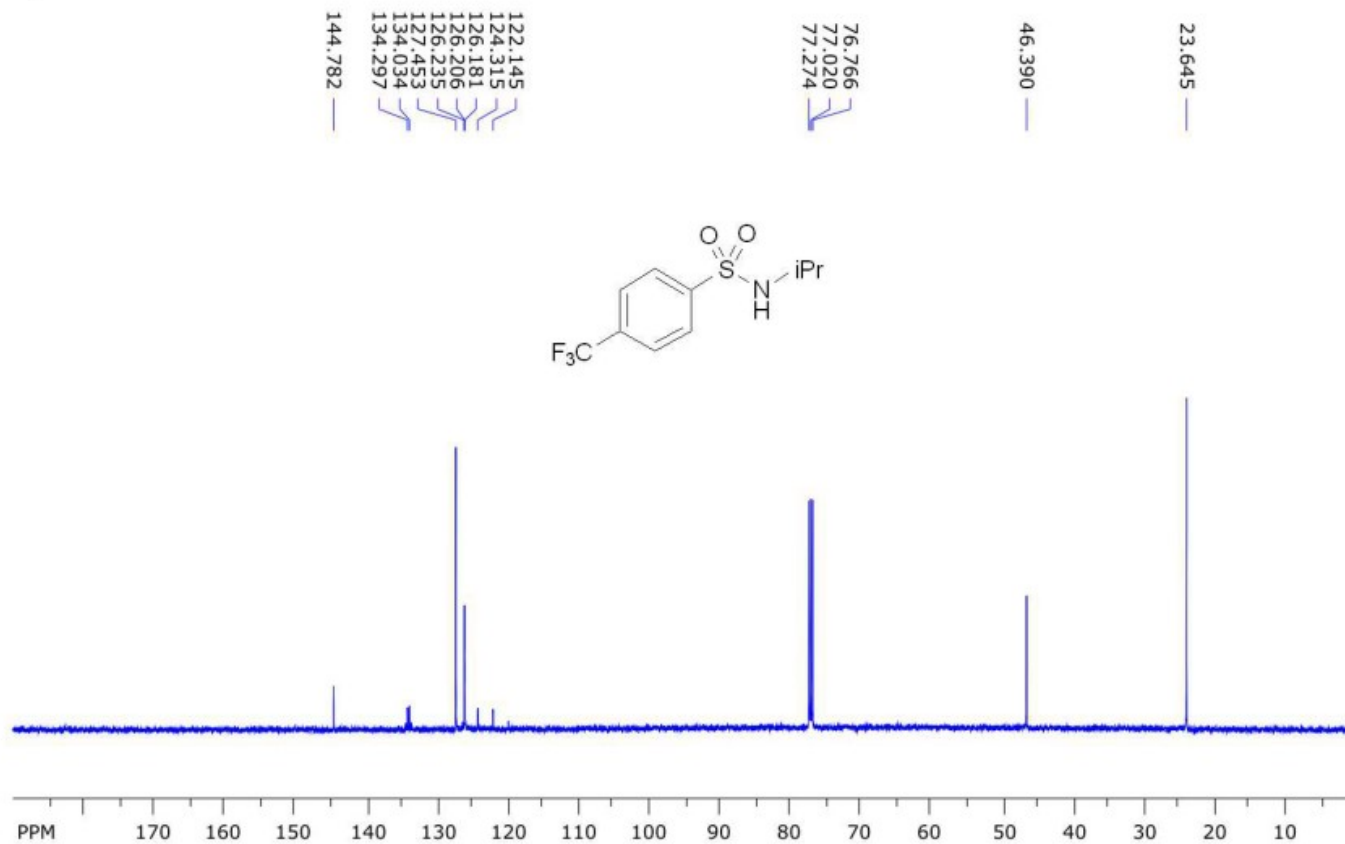

file: D:\NAPO\NMR\500-2\mkr12806\20\fid exp: <zgpg30>  
transmitter freq.: 125.772879 MHz  
time domain size: 65536 points  
width: 36057.69 Hz = 286.6889 ppm = 0.550197 Hz/pt  
number of scans: 512

freq. of 0 ppm: 125.757793 MHz  
processed size: 32768 complex points  
LB: 2.000 GF: 0.0000  
Hz/cm: 958.879 ppm/cm: 7.62390

**Compound 4t**

SpinWorks 4: IVA 3004 1H CDCl3

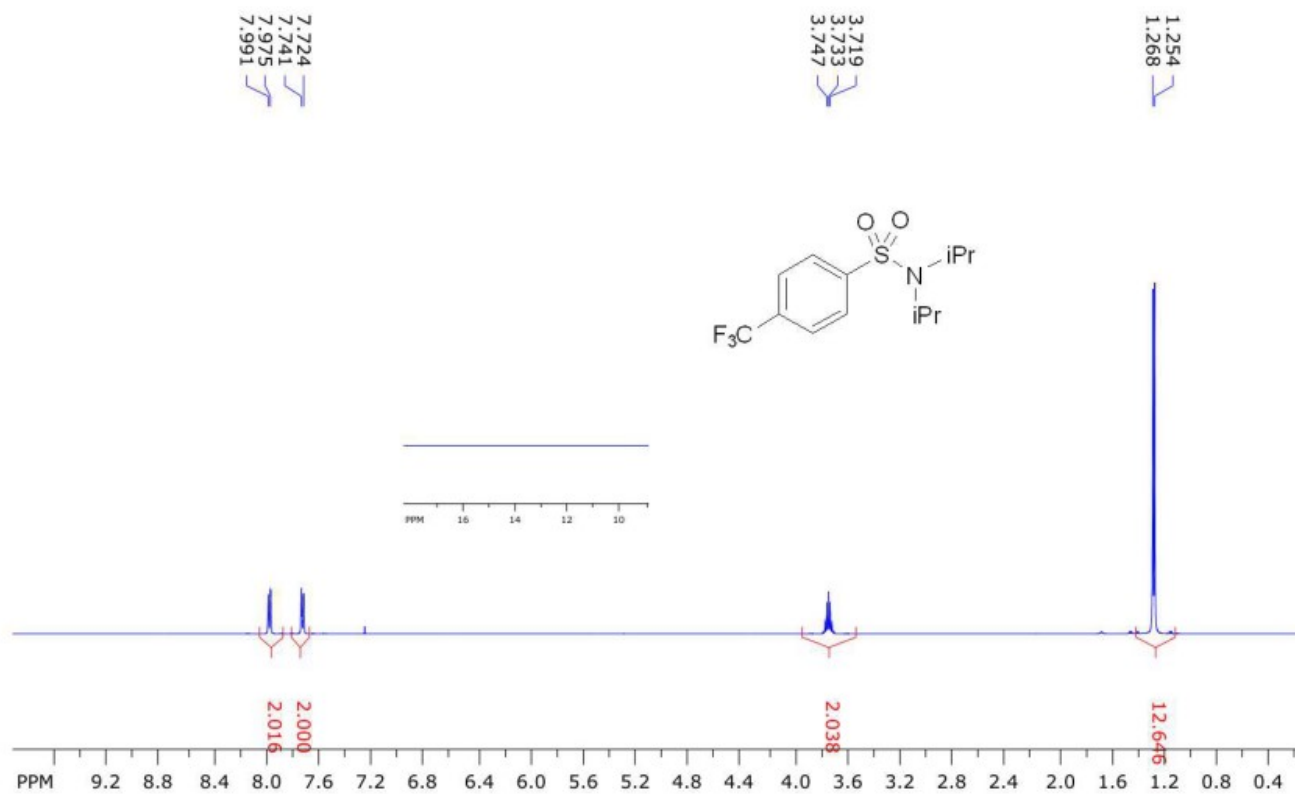

file: ...APO\NMR\500-2\mkr12606\19 3004\fid expt: <zg30>  
transmitter freq.: 500.133001 MHz  
time domain size: 65536 points  
width: 12335.53 Hz = 24.6645 ppm = 0.188225 Hz/pt  
number of scans: 24

freq. of 0 ppm: 500.130024 MHz  
processed size: 65536 complex points  
LB: 0.300 GF: 0.0000  
Hz/cm: 196.495 ppm/cm: 0.39289

**Compound 4t**

SpinWorks 4: IVA 3004 13C CDCl3

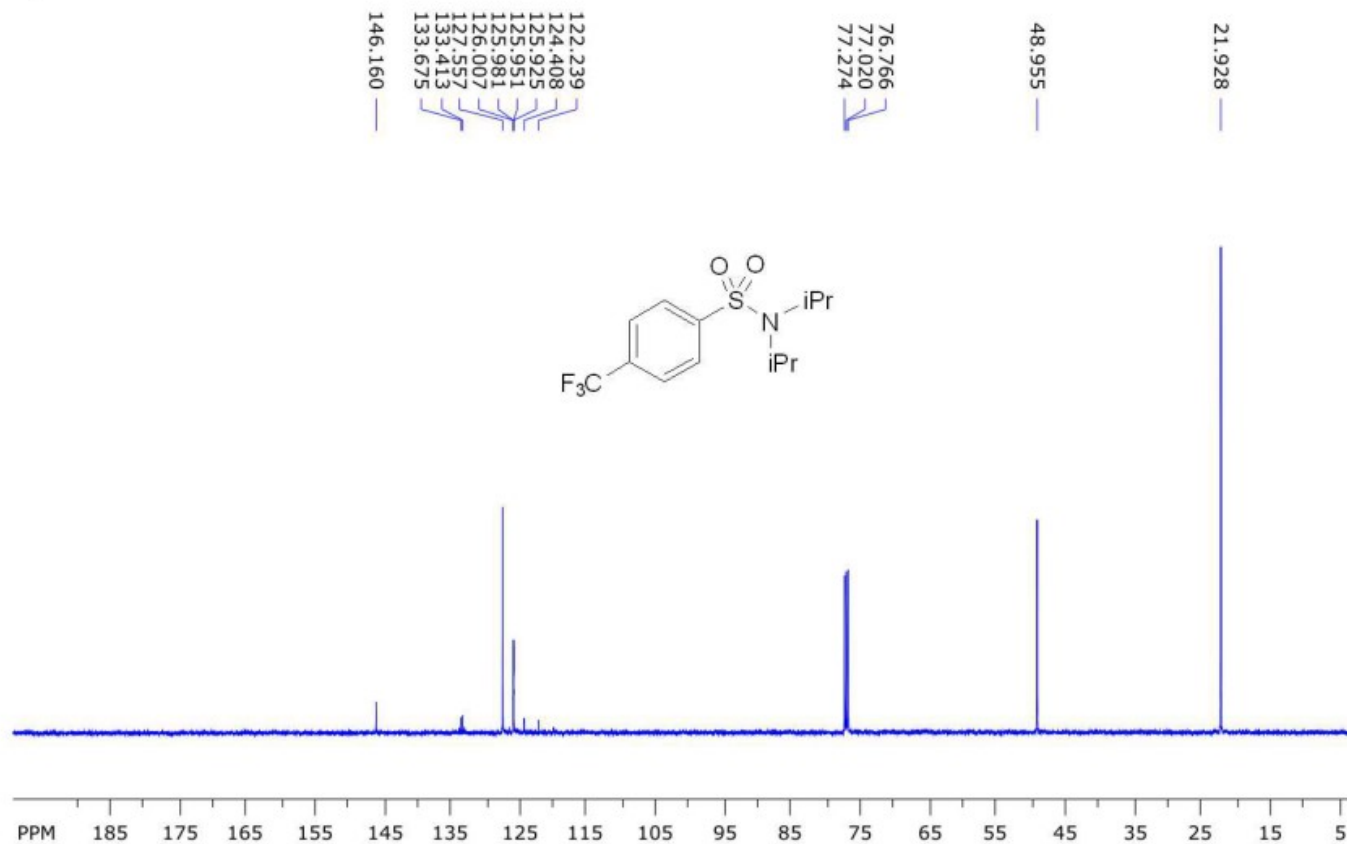

**Compound 4u**

SpinWorks 4: IVA 3018 1H CDCI3

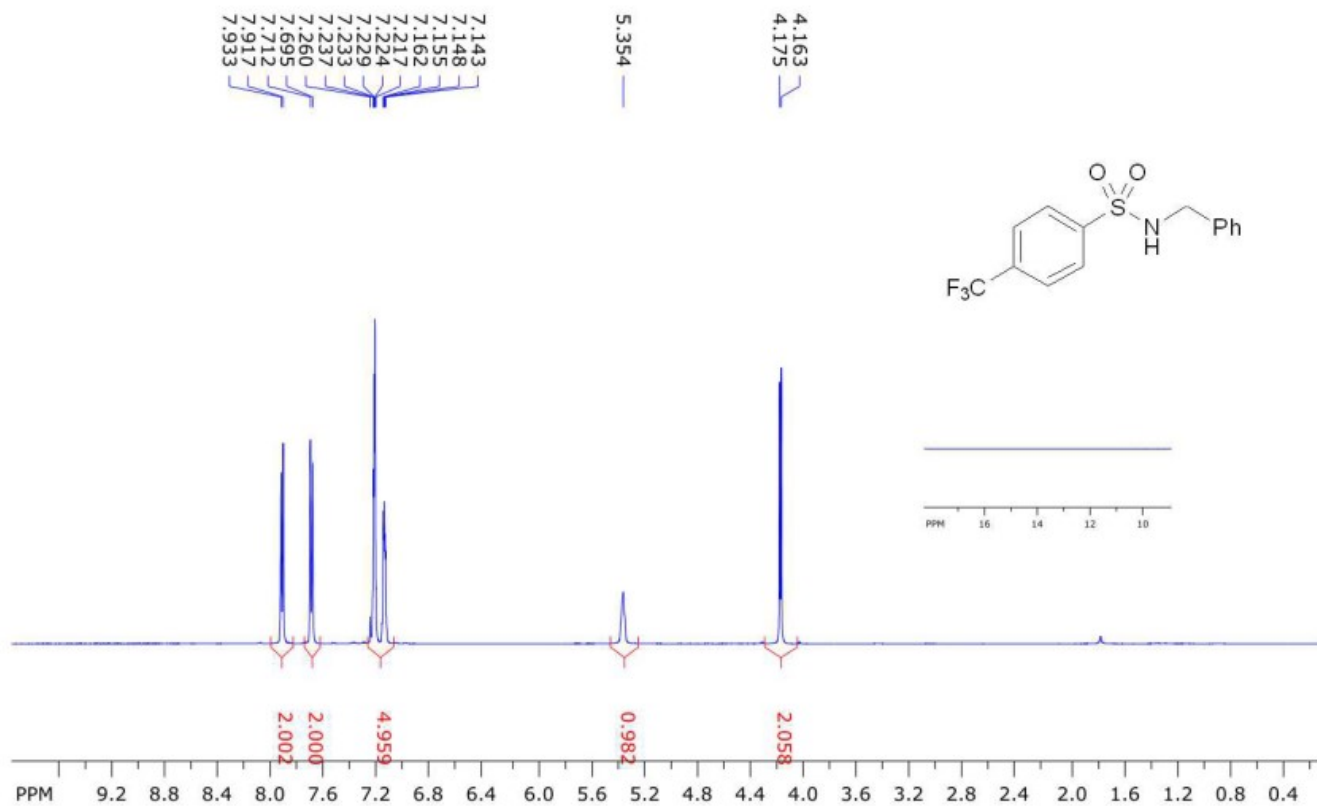

file: ...NAPO\NMR\500-2\mkr10307\3 3018\fid expt: <zg30>  
transmitter freq.: 500.133001 MHz  
time domain size: 65536 points  
width: 12335.53 Hz = 24.6645 ppm = 0.188225 Hz/pt  
number of scans: 24

freq. of 0 ppm: 500.130023 MHz  
processed size: 65536 complex points  
LB: 0.300 GF: 0.0000  
Hz/cm: 198.133 ppm/cm: 0.39616

**Compound 4u**

SpinWorks 4: IVA 3018 13C CDCl3

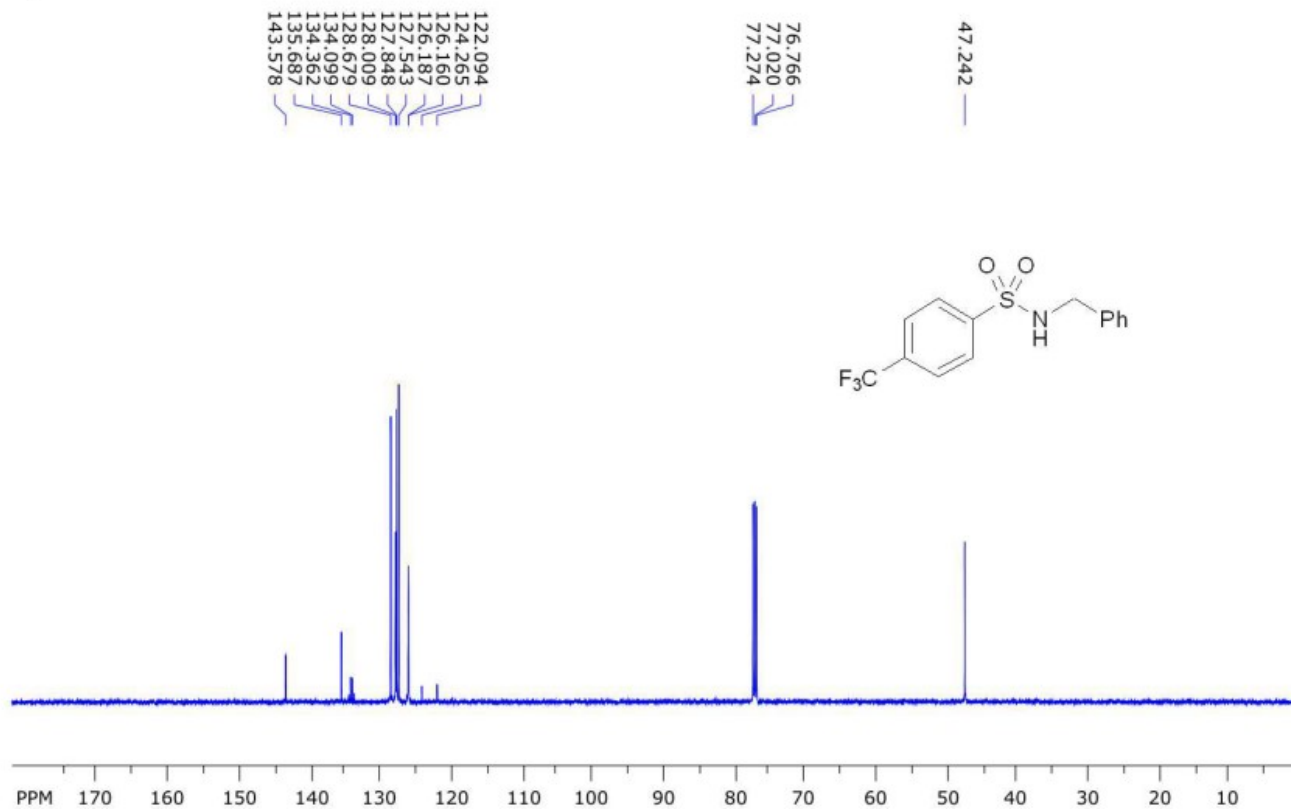

file: D:\NAPO\NMR\500-2\mkr10307\4\fid expt: <zpgg30>  
transmitter freq.: 125.772879 MHz  
time domain size: 65536 points  
width: 36057.69 Hz = 286.6889 ppm = 0.550197 Hz/pt  
number of scans: 512

freq. of 0 ppm: 125.757797 MHz  
processed size: 32768 complex points  
LB: 2.000 GF: 0.0000  
Hz/cm: 918.993 ppm/cm: 7.30676

**Compound 4v**

SpinWorks 4: IVA 2988 1H CDCL3

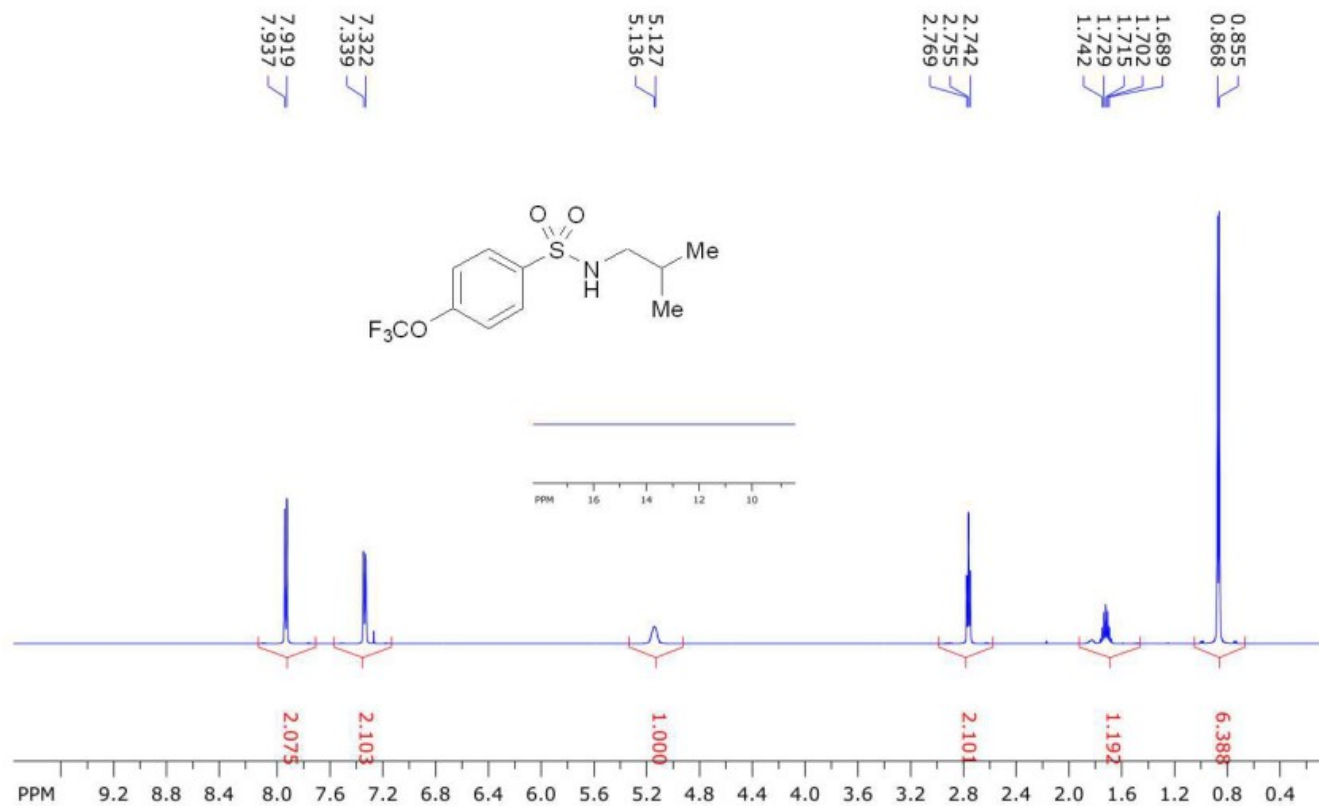

file: ...APO\NMR\500-2\mkr11406\21 2988\fid expt: <zg30>  
transmitter freq.: 500.133001 MHz  
time domain size: 65536 points  
width: 12335.53 Hz = 24.6645 ppm = 0.188225 Hz/pt  
number of scans: 24

freq. of 0 ppm: 500.130023 MHz  
processed size: 65536 complex points  
LB: 0.300 GF: 0.0000  
Hz/cm: 199.224 ppm/cm: 0.39834

**Compound 4v**

SpinWorks 4: IVA 2988 13C CDCL3

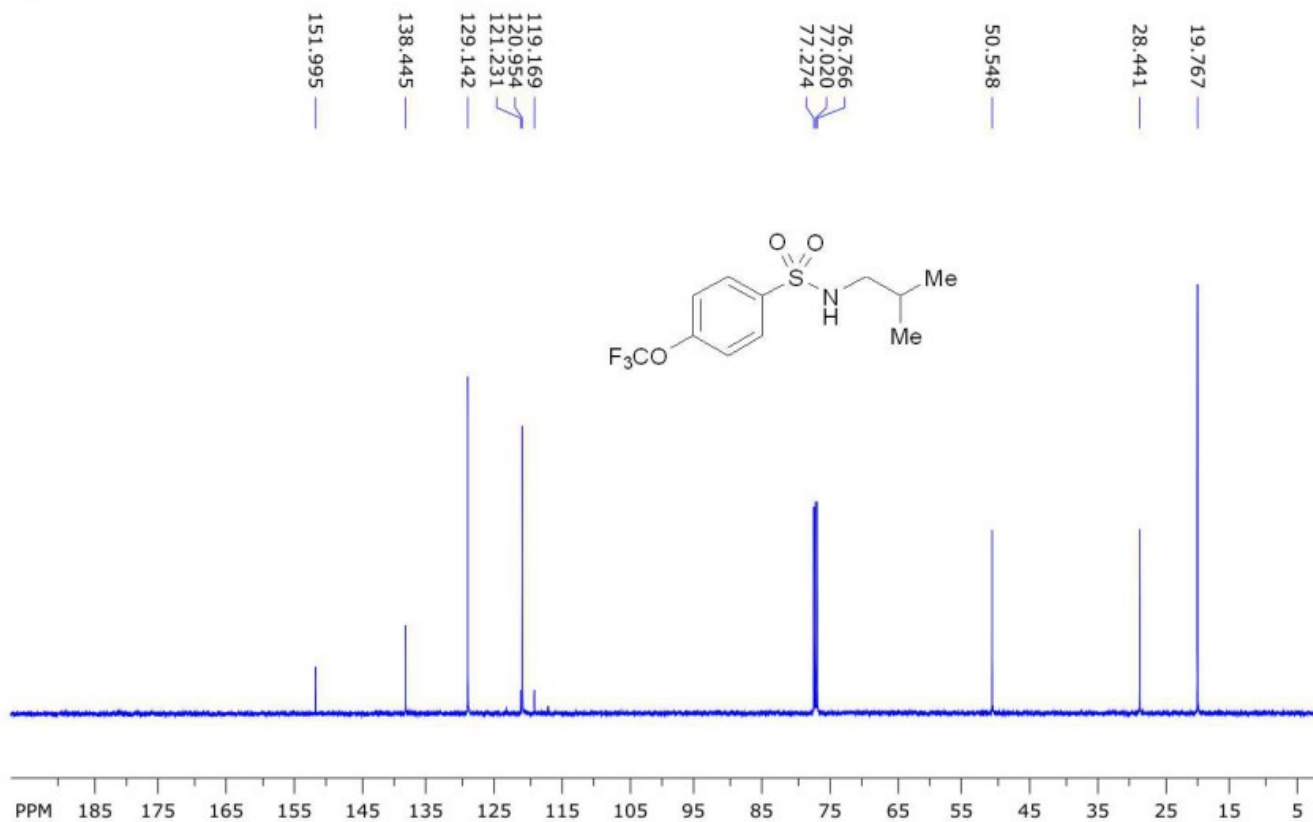

file: D:\NAPO\NMR\500-2\mkr11406\22\fid expt: <zgpg30>  
transmitter freq.: 125.772879 MHz  
time domain size: 65536 points  
width: 36057.69 Hz = 286.6889 ppm = 0.550197 Hz/pt  
number of scans: 512

freq. of 0 ppm: 125.757793 MHz  
processed size: 32768 complex points  
LB: 2.000 GF: 0.0000  
Hz/cm: 986.002 ppm/cm: 7.83955

**Compound 4w**

SpinWorks 4: IVA 2105 1H DMSO

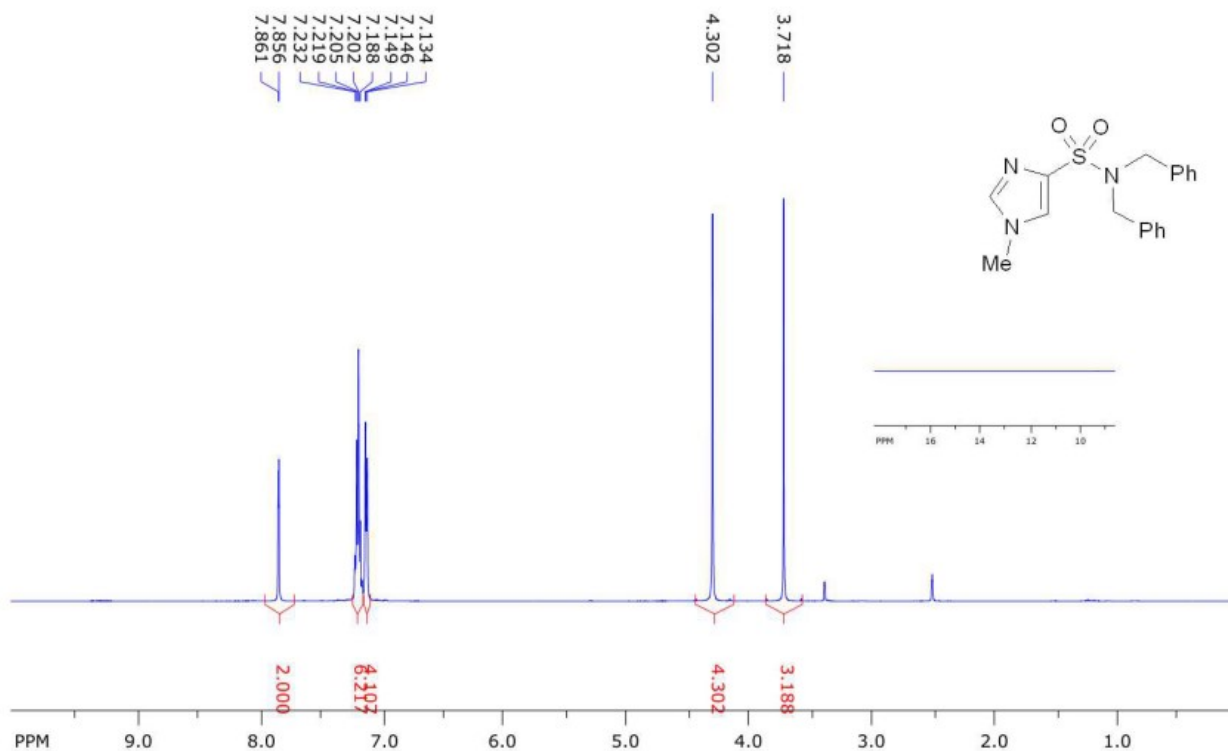

file: ...APO\NMR\500-2\mkr10608\25 2105\fid expt: <zg30>  
transmitter freq.: 500.133001 MHz  
time domain size: 65536 points  
width: 12335.53 Hz = 24.6645 ppm = 0.188225 Hz/pt  
number of scans: 24

freq. of 0 ppm: 500.130005 MHz  
processed size: 65536 complex points  
LB: 0.300 GF: 0.0000  
Hz/cm: 200.862 ppm/cm: 0.40162

**Compound 4w**



SpinWorks 4: IVA 2105 13C DMSO

125.211  
127.243  
128.101  
128.197  
136.490  
138.451  
139.936

33.512  
39.030  
39.187  
39.353  
39.520  
39.687  
39.854  
40.021  
51.437

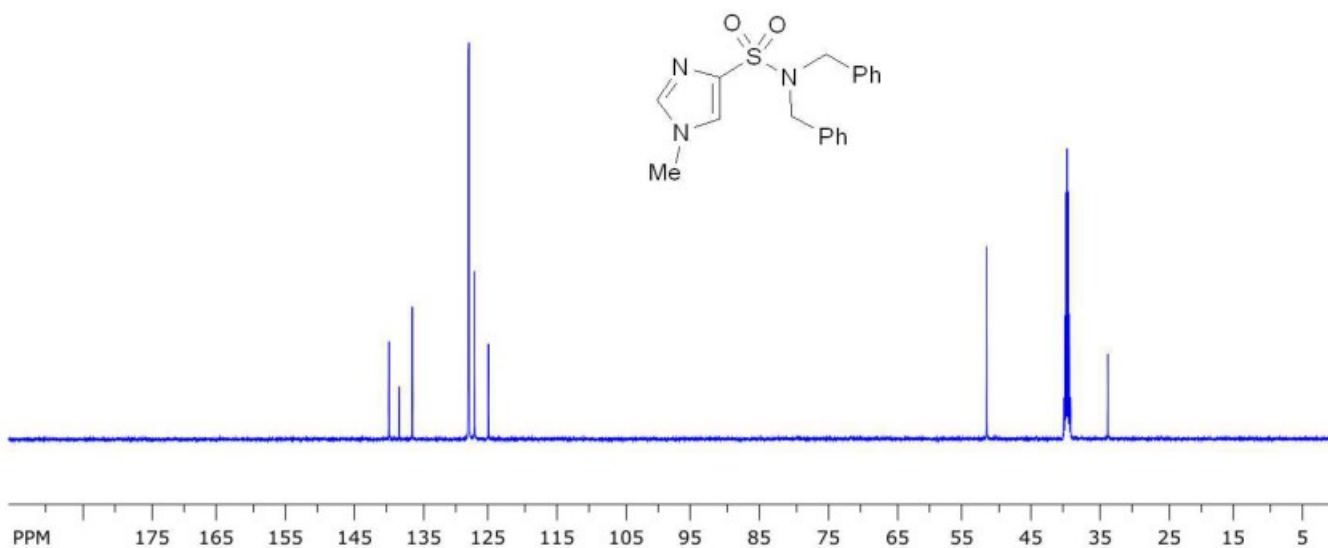

file: D:\NAPO\NMR\500-2\mkr10608\26\fid expt: <zpgg30>  
transmitter freq.: 125.772879 MHz  
time domain size: 65536 points  
width: 36057.69 Hz = 286.6889 ppm = 0.550197 Hz/pt  
number of scans: 512

freq. of 0 ppm: 125.757846 MHz  
processed size: 32768 complex points  
LB: 2.000 GF: 0.0000  
Hz/cm: 987.598 ppm/cm: 7.85223

**Compound 4x**

SpinWorks 4: IVA 2404 1H

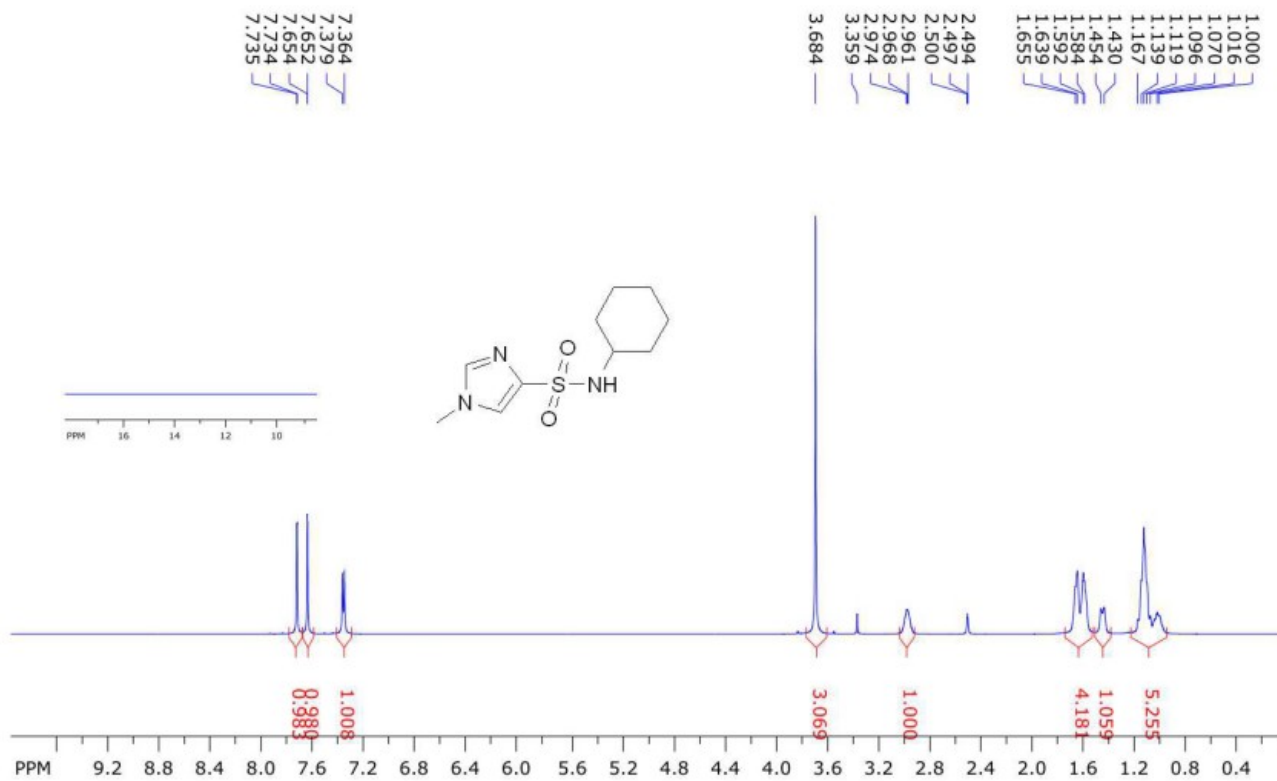

file: ...APO\NMR\500-2\mkr12506\25 2404\fid expt: <zg30>  
transmitter freq.: 500.133001 MHz  
time domain size: 65536 points  
width: 12335.53 Hz = 24.6645 ppm = 0.188225 Hz/pt  
number of scans: 24

freq. of 0 ppm: 500.130006 MHz  
processed size: 65536 complex points  
LB: 0.300 GF: 0.0000  
Hz/cm: 198.678 ppm/cm: 0.39725

Compound 4x

SpinWorks 4: IVA 2404 13C

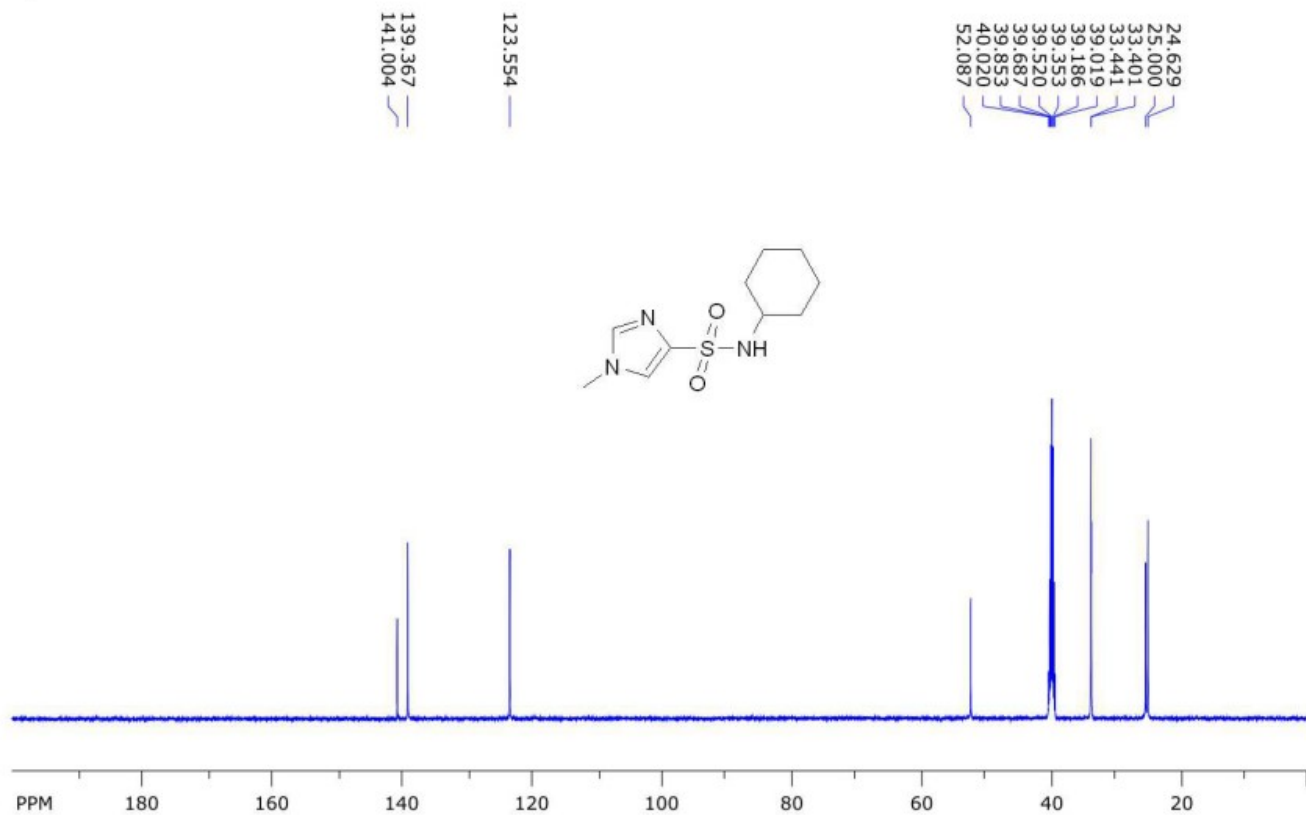

file: D:\NAPO\NMR\500-2\mkr12506\26\fid expt: <zgpg30>  
transmitter freq.: 125.772879 MHz  
time domain size: 65536 points  
width: 36057.69 Hz = 286.6889 ppm = 0.550197 Hz/pt  
number of scans: 512

freq. of 0 ppm: 125.757840 MHz  
processed size: 32768 complex points  
LB: 2.000 GF: 0.0000  
Hz/cm: 1009.934 ppm/cm: 8.02983

**Compound 4y**

SpinWorks 4: IVA 2399 1H

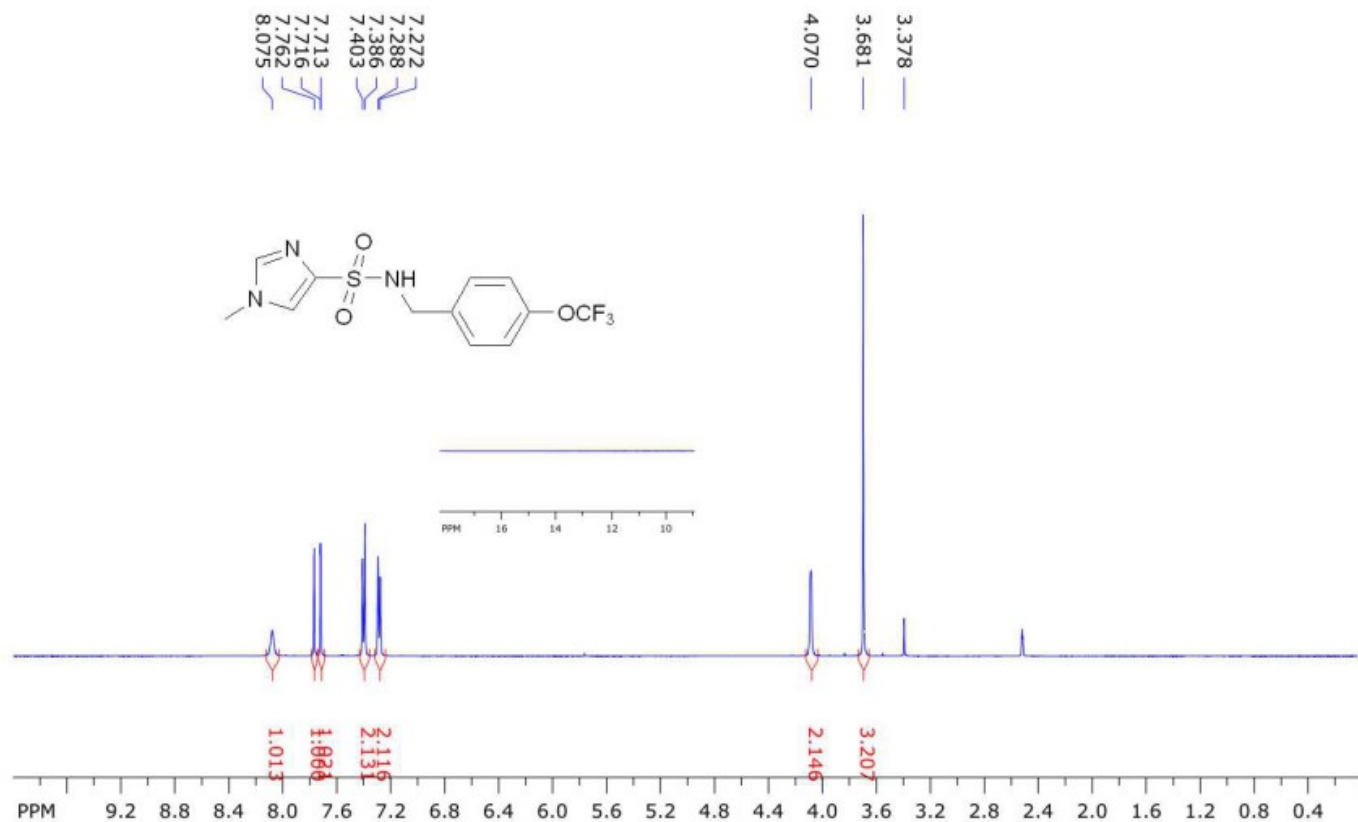

file: ...NAPO\NMR\500-2\mkr10207\5 2399\fid expt: <zg30>  
transmitter freq.: 500.133001 MHz  
time domain size: 65536 points  
width: 12335.53 Hz = 24.6645 ppm = 0.188225 Hz/pt  
number of scans: 24

freq. of 0 ppm: 500.130005 MHz  
processed size: 65536 complex points  
LB: 0.300 GF: 0.0000  
Hz/cm: 199.770 ppm/cm: 0.39943

**Compound 4y**

SpinWorks 4: IVA 2399 13C

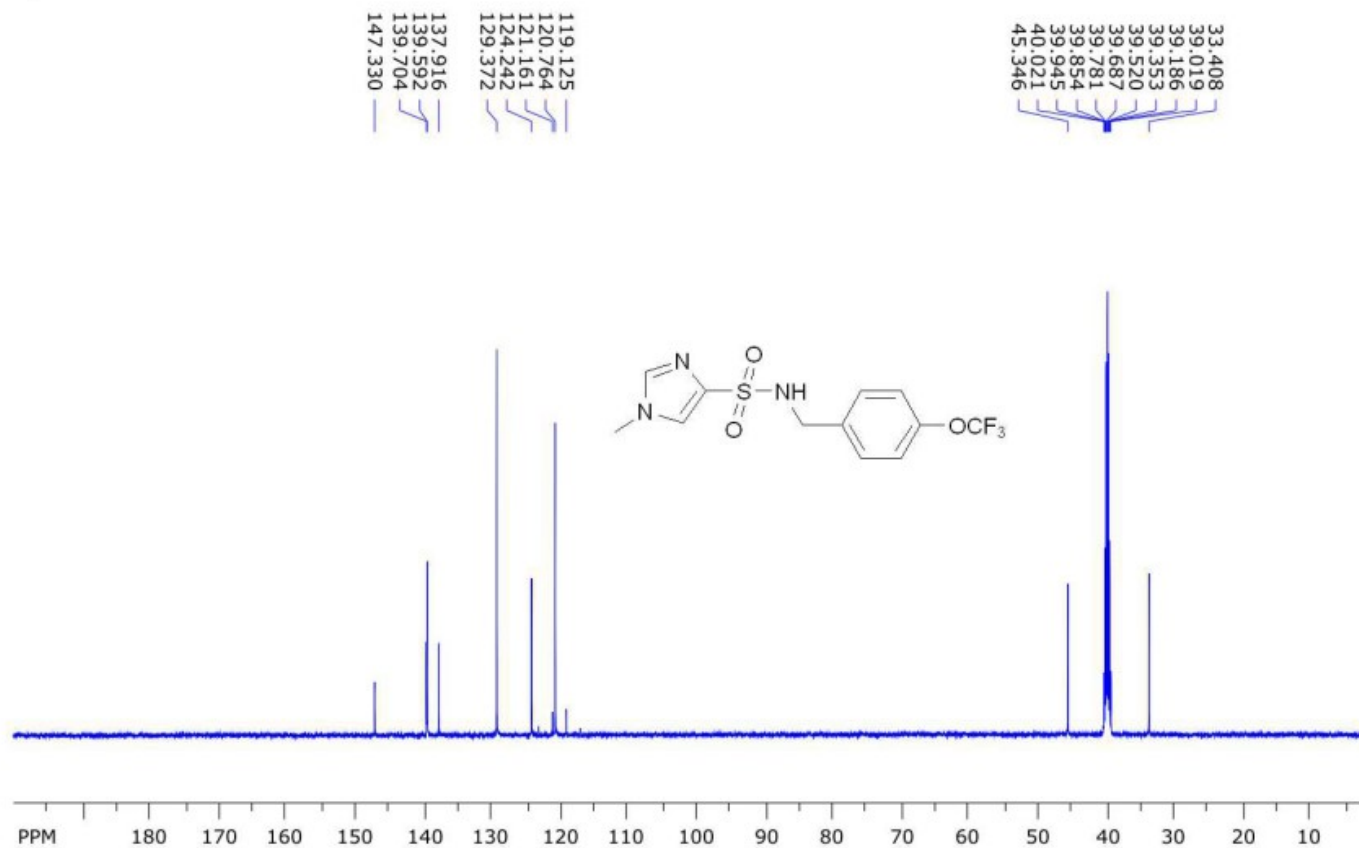

file: D:\NAPO\NMR\500-2\mkr10207\6\fid expt: <zpgg30>  
transmitter freq.: 125.772879 MHz  
time domain size: 65536 points  
width: 36057.69 Hz = 286.6889 ppm = 0.550197 Hz/pt  
number of scans: 512

freq. of 0 ppm: 125.757838 MHz  
processed size: 32768 complex points  
LB: 2.000 GF: 0.0000  
Hz/cm: 998.766 ppm/cm: 7.94103

**Compound 4z**

SpinWorks 4: IVA 2391 1H

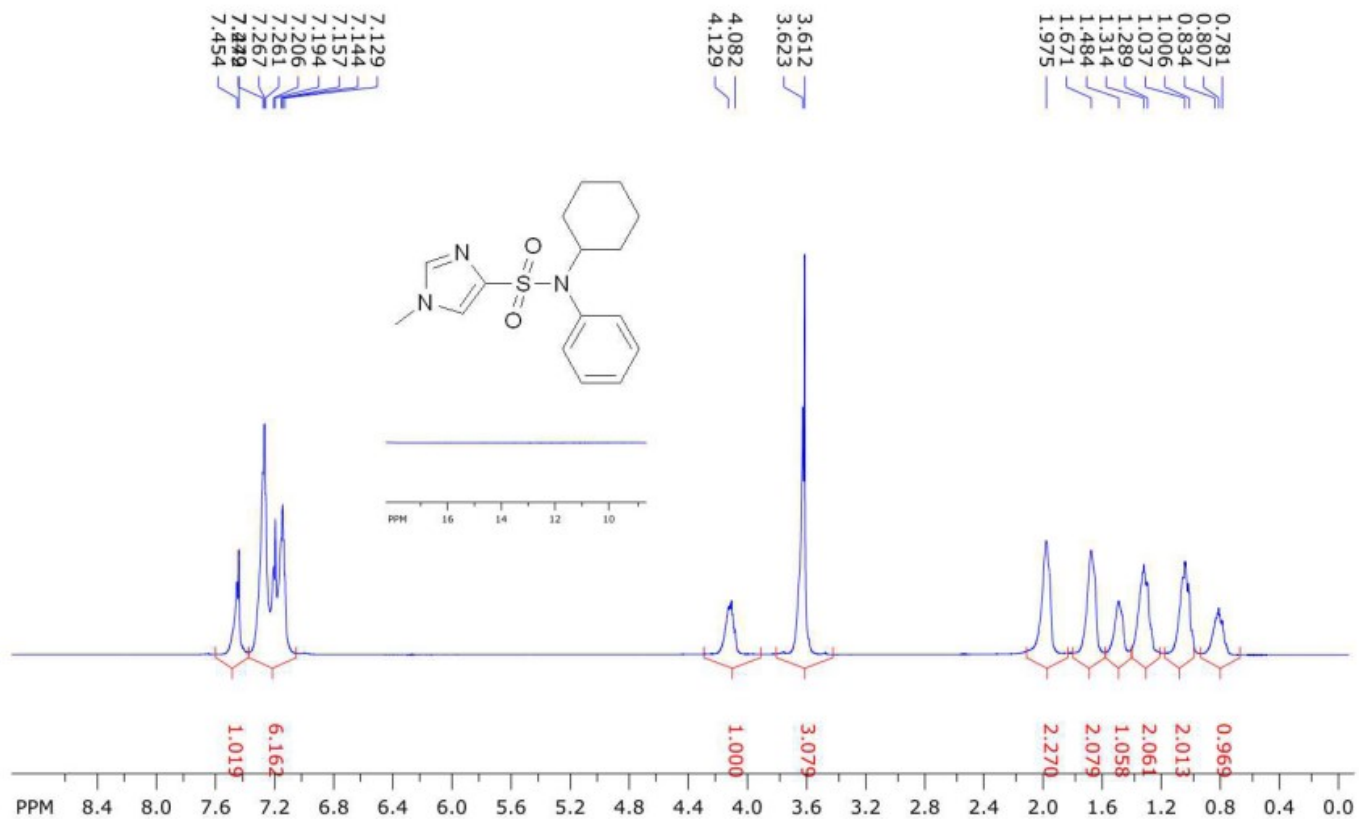

file: ...\\NMR\\500-2\\mkr12205\\9 iva 2391\\fid expt: <zg30>  
transmitter freq.: 500.133001 MHz  
time domain size: 65536 points  
width: 12335.53 Hz = 24.6645 ppm = 0.188225 Hz/pt  
number of scans: 24

freq. of 0 ppm: 500.130024 MHz  
processed size: 65536 complex points  
LB: 0.300 GF: 0.0000  
Hz/cm: 181.212 ppm/cm: 0.36233

**Compound 4z**

SpinWorks 4: IVA 2391 13C

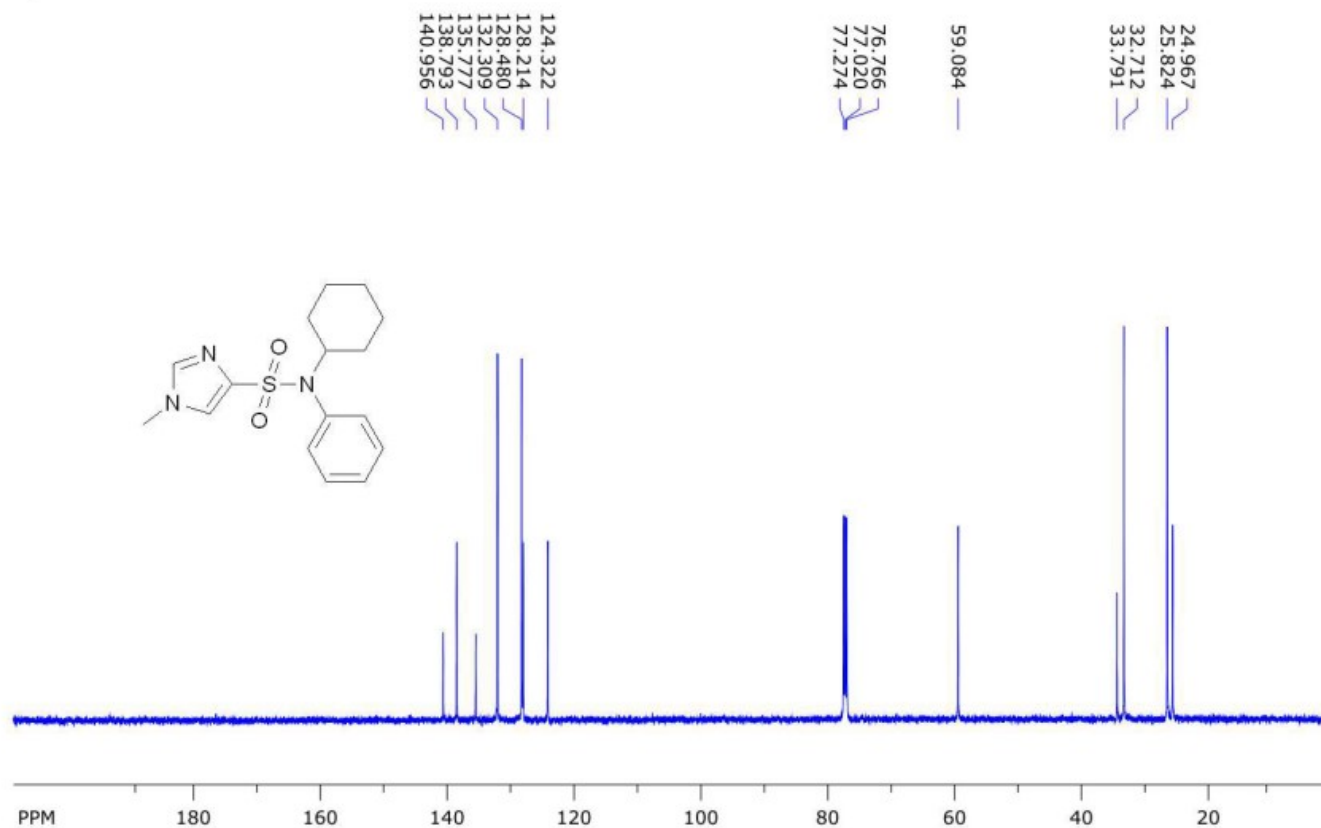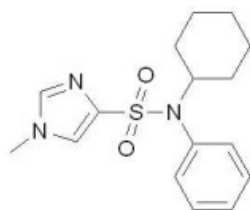

file: D:\NAPO\NMR\500-2\mkr12205\10\fid expt: <zgpg30>  
transmitter freq.: 125.772879 MHz  
time domain size: 65536 points  
width: 36057.69 Hz = 286.6889 ppm = 0.550197 Hz/pt  
number of scans: 512

freq. of 0 ppm: 125.757808 MHz  
processed size: 32768 complex points  
LB: 2.000 GF: 0.0000  
Hz/cm: 1053.012 ppm/cm: 8.37233

**Compound 4aa**

SpinWorks 4: IVA 2976 1H CDCl3

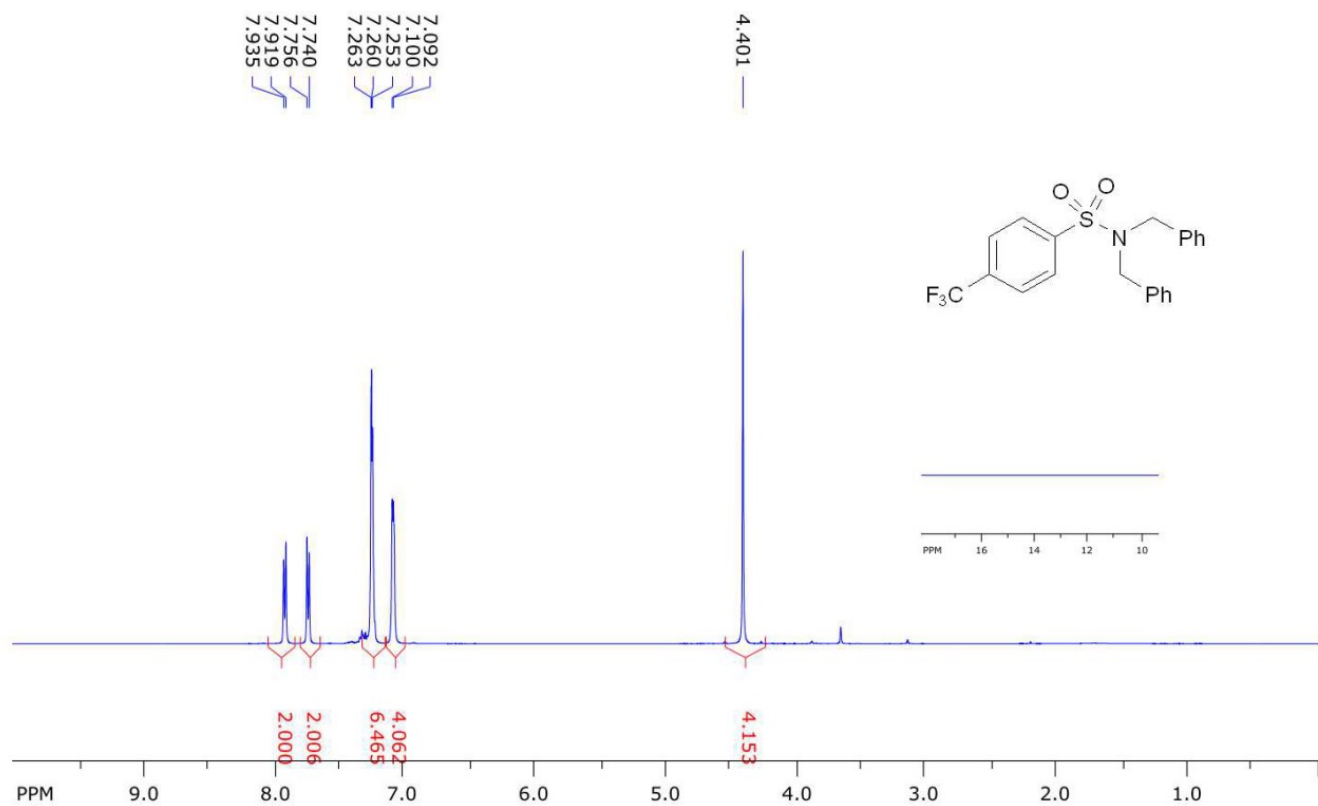

file: ...APO\NMR\500-2\mkr11406\17 2976\fid expt: <zg30>  
transmitter freq.: 500.133001 MHz  
time domain size: 65536 points  
width: 12335.53 Hz = 24.6645 ppm = 0.188225 Hz/pt  
number of scans: 24

freq. of 0 ppm: 500.130020 MHz  
processed size: 65536 complex points  
LB: 0.300 GF: 0.0000  
Hz/cm: 201.953 ppm/cm: 0.40380

**Compound 4aa**



SpinWorks 4: IVA 2976 13C CDCl3

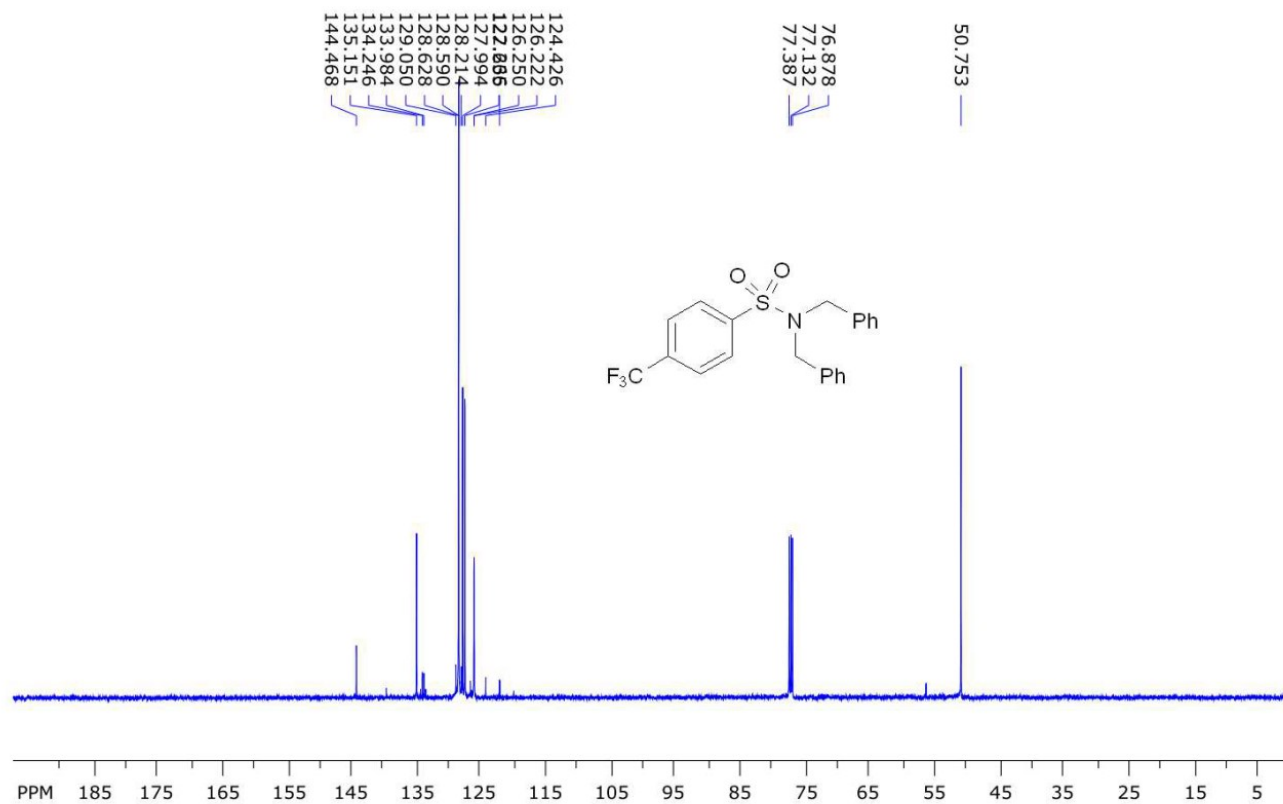

file: D:\NAPO\NMR\500-2\mkr11406\18\fid expt: <zpgg30>  
transmitter freq.: 125.772879 MHz  
time domain size: 65536 points  
width: 36057.69 Hz = 286.6889 ppm = 0.550197 Hz/pt  
number of scans: 512

freq. of 0 ppm: 125.757789 MHz  
processed size: 32768 complex points  
LB: 2.000 GF: 0.0000  
Hz/cm: 993.980 ppm/cm: 7.90297

**Compound 11**

SpinWorks 4: IVA 2489 1H CDCI3

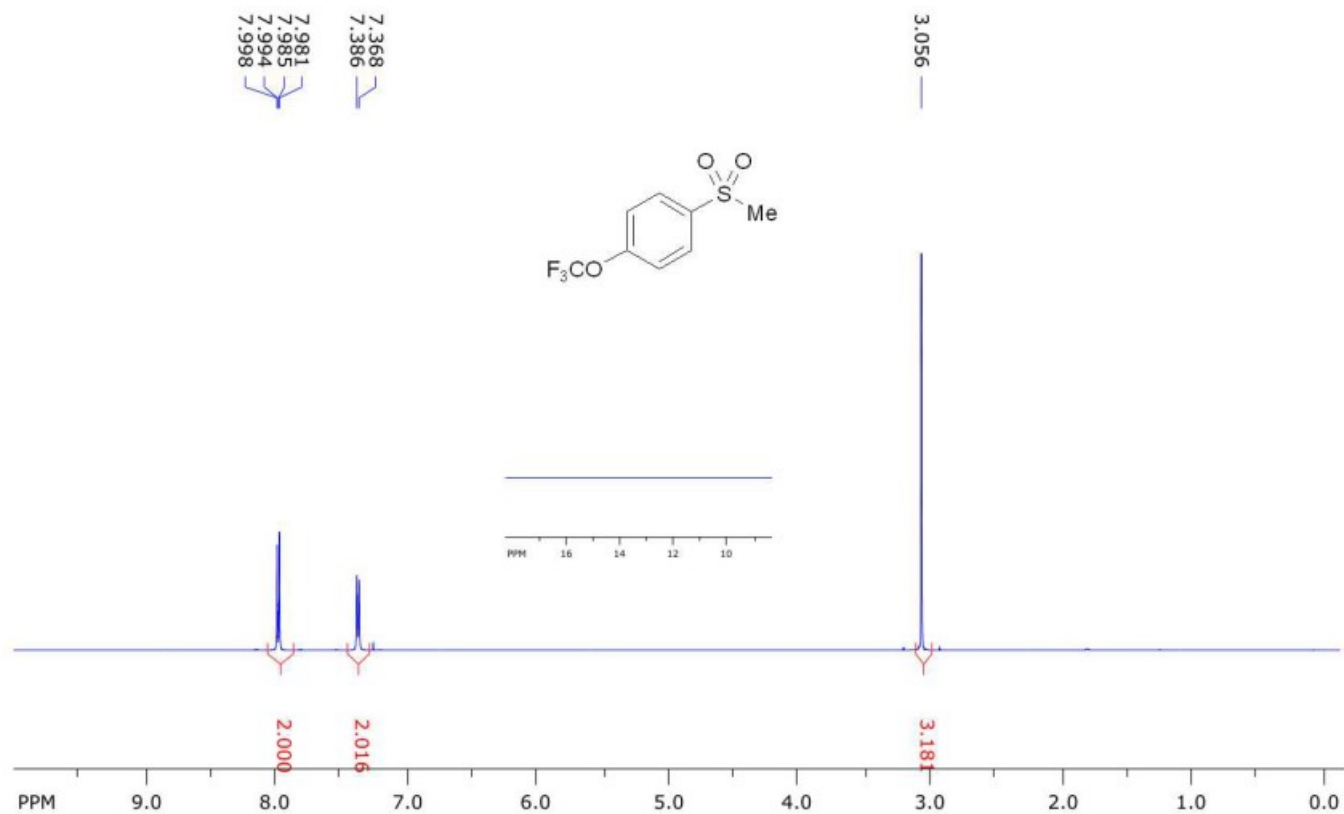

file: ...APO\NMR\500-2\mkr11906\13 2489\fid expt: <zg30>  
transmitter freq.: 500.133001 MHz  
time domain size: 65536 points  
width: 12335.53 Hz = 24.6645 ppm = 0.188225 Hz/pt  
number of scans: 24

freq. of 0 ppm: 500.130023 MHz  
processed size: 65536 complex points  
LB: 0.300 GF: 0.0000  
Hz/cm: 203.591 ppm/cm: 0.40707

**Compound 11**

SpinWorks 4: IVA 2489 13C CDCI3

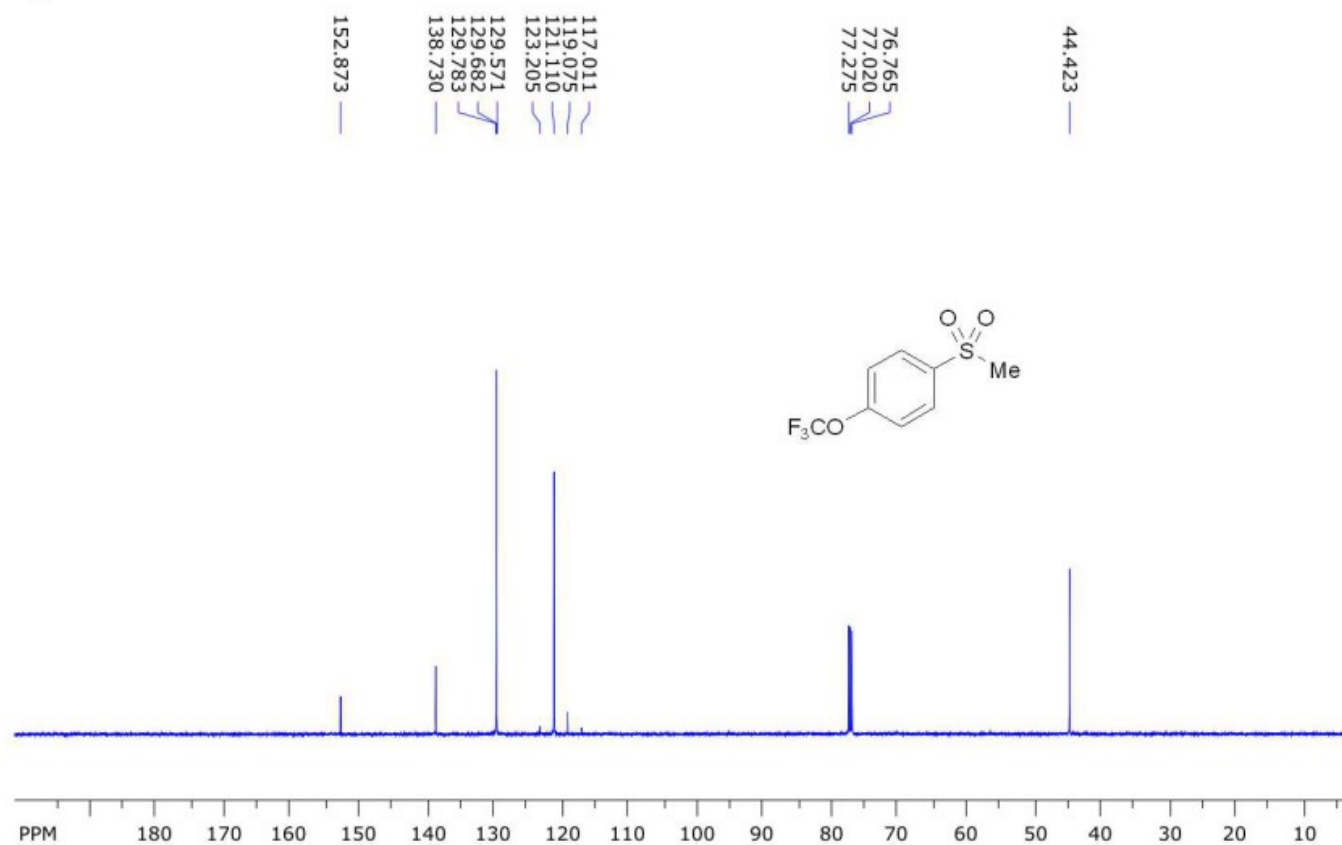

file: D:\NAPO\NMR\500-2\mkr11906\14\fid exp: <zgpg30>  
transmitter freq.: 125.772879 MHz  
time domain size: 65536 points  
width: 36057.69 Hz = 286.6889 ppm = 0.550197 Hz/pt  
number of scans: 512

freq. of 0 ppm: 125.757798 MHz  
processed size: 32768 complex points  
LB: 2.000 GF: 0.0000  
Hz/cm: 1001.957 ppm/cm: 7.96640

**Compound 13**

SpinWorks 4: IVA 2641 1H CDCl3

7.437  
7.454  
7.468  
7.497  
7.510  
7.914  
7.930

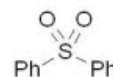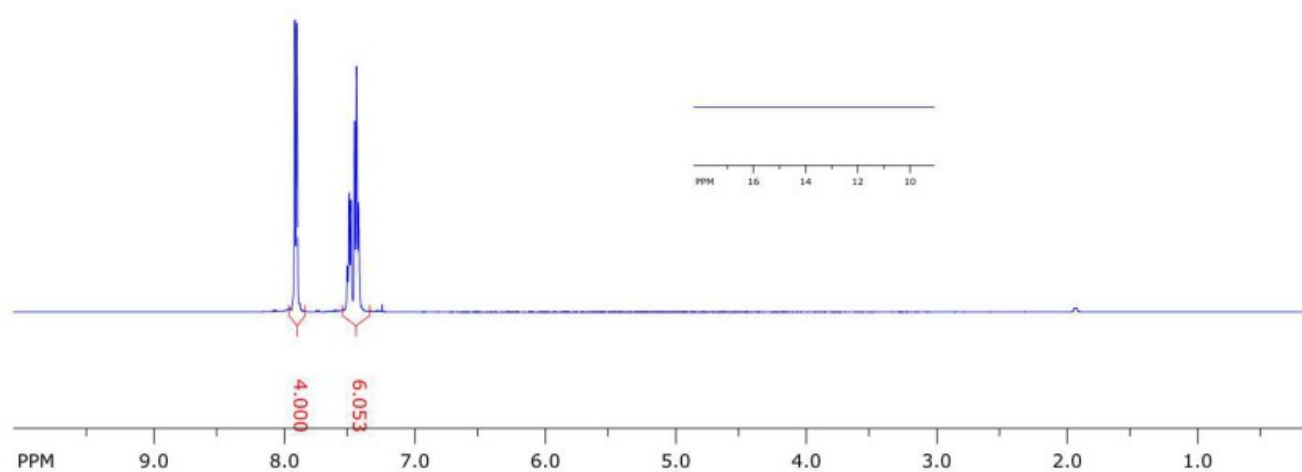

file: ...NAPO\NMR\500-2\mkr13105\7 2641\fid expt: <zg30>  
transmitter freq.: 500.133001 MHz  
time domain size: 65536 points  
width: 12335.53 Hz = 24.6645 ppm = 0.188225 Hz/pt  
number of scans: 24

freq. of 0 ppm: 500.130024 MHz  
processed size: 65536 complex points  
LB: 0.300 GF: 0.0000  
Hz/cm: 200.316 ppm/cm: 0.40053

**Compound 13**

SpinWorks 4: IVA 2641 13C CDCl3

141.335  
127.427  
129.153  
133.099

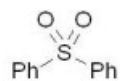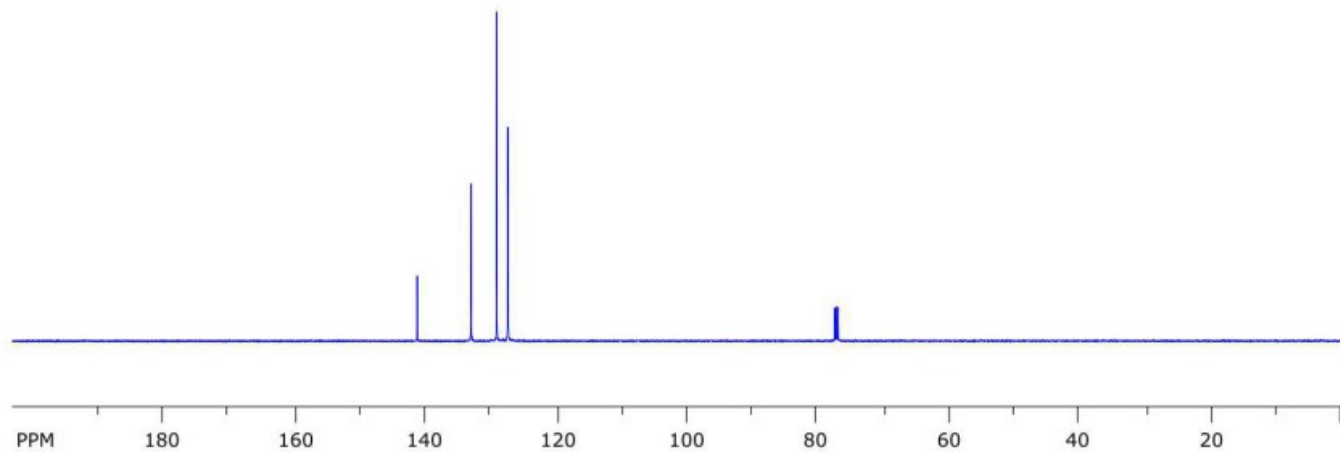

file: D:\NAPO\NMR\500-2\mkr13105\8\fid exp: <zggg30>  
transmitter freq.: 125.772879 MHz  
time domain size: 65536 points  
width: 36057.69 Hz = 286.6889 ppm = 0.550197 Hz/pt  
number of scans: 512

freq. of 0 ppm: 125.757814 MHz  
processed size: 32768 complex points  
LB: 2.000 GF: 0.0000  
Hz/cm: 1029.080 ppm/cm: 8.18205
